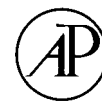

## Nuclear DNA Amounts in Angiosperms and their Modern Uses—807 New Estimates

MICHAEL D. BENNETT\*, PARMJIT BHANDOL and ILIA J. LEITCH

*Jodrell Laboratory, Royal Botanic Gardens, Kew, Richmond, Surrey TW9 3DS, UK*

Received: 6 June 2000 Returned for revision: 22 June 2000 Accepted: 28 June 2000

### CONTENTS

|                                                                            |     |
|----------------------------------------------------------------------------|-----|
| INTRODUCTION                                                               | 859 |
| <i>The Angiosperm Genome Size Workshop, September 1997</i>                 | 860 |
| IDENTIFYING GAPS IN OUR KNOWLEDGE OF PLANT C-VALUES                        | 861 |
| FILLING MAJOR GAPS IN OUR KNOWLEDGE OF PLANT C-VALUES                      | 862 |
| <i>Recent progress towards meeting the targets for angiosperms</i>         | 862 |
| <i>Recent progress towards meeting the targets for non-angiosperms</i>     | 863 |
| TECHNICAL TRENDS AND LIMITING FACTORS IN C-VALUE WORK                      | 863 |
| <i>Recent trends in methods of choice for plant C-value estimation</i>     | 863 |
| <i>The 'obsolescence time bomb' threatening plant C-value research</i>     | 864 |
| <i>Connecting C-values given only in arbitrary units with the database</i> | 865 |
| MODERN USES OF PLANT C-VALUE AND GENOME SIZE DATA                          | 865 |
| <i>DNA C-values in modern molecular practice</i>                           | 865 |
| <i>DNA C-values and mechanisms in genome size evolution</i>                | 865 |
| <i>C-value constancy and variation—a new C-value paradox?</i>              | 867 |
| <i>Using C-values to probe phylogenetic dimensions</i>                     | 867 |
| <i>DNA amounts as predictors and indicators</i>                            | 868 |
| <i>C-values as ecological and environmental indicators</i>                 | 868 |
| <i>Using inferred C-values to reveal paleobiological trends</i>            | 868 |
| <i>DNA amounts and their conservation interest</i>                         | 869 |
| LITERATURE CITED                                                           | 869 |
| APPENDIX                                                                   | 872 |
| <i>Notes to the Appendix</i>                                               | 872 |
| <i>Original references for DNA values</i>                                  | 907 |

The DNA amount in the unreplicated haploid nucleus of an organism is known as its C-value. C-values differ about 1000-fold among angiosperms and are characteristic of taxa. The data are used in many biological fields, so they should be easily available. Values for 2802 angiosperm species (1 %) were estimated during 1950–1997, and five collected lists of C-values were published for reference purposes during 1976–1997. Numbers of new angiosperm C-values published recently remained high, necessitating a further supplementary list. This paper lists DNA C-values for 807 angiosperm species from 70 original sources, including 520 (75.2 %) from sources published after 1996, and 691 for species not included in any of the previous five lists. There is a continuing need to estimate accurate DNA C-values for plant taxa, as shown in a workshop on this biodiversity topic sponsored by *Annals of Botany* and held at Kew in 1997. Its key aim was to identify major gaps in our knowledge of plant DNA amounts and to recommend targets and priorities for new work to fill them. A target of estimating first C-values for the next 1 % of angiosperm species in 5 years was set. The proportion of such C-values in the present work (85.6 %) is very high; and the number being published (approx. 220 per annum) has never been exceeded. In 1997, C-values were still unknown for most (68 %) families, so a target of complete coverage was set. This paper includes first C-values for 12 families, but as less than 2 % of such values listed here targeted new families, the need to improve familial representation remains.

© 2000 Annals of Botany Company

**Key words:** Angiosperm DNA amounts, DNA C-values, nuclear genome sizes, plant DNA database.

### INTRODUCTION

The DNA amount in the unreplicated haploid or gametic nucleus of an organism is referred to as its C-value (Swift,

1950), irrespective of the ploidy level of the taxon. C-value equals genome size in diploid species, but always exceeds genome size(s) in polyploid species. Nuclear DNA C-values differ by approx. 1000-fold among angiosperms, ranging from about 0.1 pg to about 125 pg, and tend to be characteristic for a taxon. C-values are used in many

\* For correspondence. Fax +44(0)20 8332 5310, e-mail [m.bennett@rbgkew.org.uk](mailto:m.bennett@rbgkew.org.uk)

biological fields, so they should be easily available for reference and analysis. Five collected lists of nuclear DNA amounts have been published for reference purposes (Bennett and Smith, 1976, 1991; Bennett *et al.*, 1982; Bennett and Leitch, 1995, 1997). These were recently pooled into one combined list with C-values for 2802 species from 306 original sources. A first version of the Angiosperm DNA C-values database was published electronically in April 1997, and a new relational version (release 2.0) went live in October 1998 (<http://www.rbgekew.org.uk/cval/database1.html>). The number of new angiosperm C-values published recently has continued to be high, necessitating the production of a further supplementary list. This paper lists DNA C-values for 807 angiosperm species from 70 original sources, including 520 (75.2%) from sources published or communicated after 1996, and 691 for species not included in the previous five lists.

#### *The Angiosperm Genome Size Workshop, September 1997*

Nuclear DNA C-value and genome size are important biodiversity characters. As with other factors it is important to know how much information is available, who needs it, and also to assess what it is used for and the impact of those uses (Bennett, 1998). A preliminary analysis of these questions was presented by Bennett and Leitch (1995). This led to informal discussions among a small international group of interested scientists, and later to a workshop and discussion meeting held at the Royal Botanic Gardens, Kew (RBG, Kew) in September 1997 which was sponsored by *Annals of Botany*. These were attended by about 90 scientists from 15 countries with special expertise or interest in generating and using information on plant nuclear DNA amounts, and were highly focused on the questions listed above. Fourteen papers from the discussion meeting were published in a special issue 'Genome size in plants' in *Annals of Botany* volume 82 (Supplement A) in 1998 (Bennett and Leitch, 1998). A report on the workshop's recommendations was given orally to participants at the discussion meeting, but its valuable work merits wider exposure. This paper, listing angiosperm C-values published mainly in 1997–1999, is a suitable vehicle in which to mention some key conclusions of that 1997 workshop. One recommendation was to hold a similar workshop in about 5 years to assess progress in the field. Half of that period has already elapsed, and new work on plant C-values undertaken since the 1997 workshop has begun to be published. It is timely, therefore, (1) to mention the main targets for new work agreed in 1997; (2) to assess progress towards the 5-year goals set; and (3) to monitor how plant DNA C-value information is being used.

One useful measure of interest in angiosperm DNA C-values comes from calculating the numbers of estimates communicated per year, and establishing any trend in this factor. Analysis of such estimates for the 3493 species listed in the pooled Angiosperm DNA C-values database and the present work shows a continuing strong increase in the mean number per year of total estimates and the mean number of 'prime' estimates (usually the first) for species listed for all but one of eight successive 5 year periods

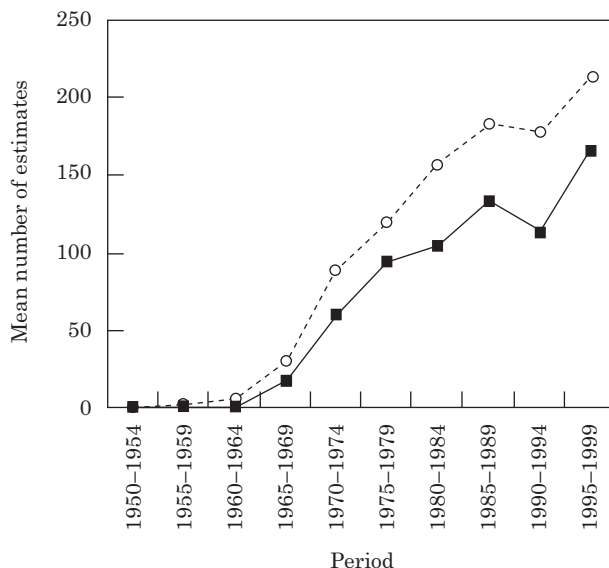

FIG. 1. Mean number per year of total (---○---) and 'prime' (—■—) DNA C-value estimates communicated in ten successive 5 year periods between 1950 and 1999. Based on analysis of 3493 DNA C-values pooled from the Angiosperm DNA C-values database (Bennett *et al.*, 1997) and this paper.

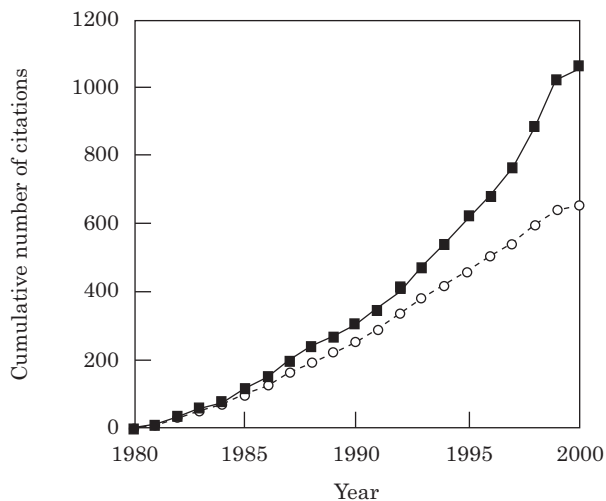

FIG. 2. Cumulative number of citations for the first nuclear DNA reference list (Bennett and Smith, 1976) (---○---) and for all DNA lists (—■—) i.e. Bennett and Smith (1976, 1991), Bennett *et al.* (1982), and Bennett and Leitch (1995, 1997) between 1980 and May 2000.

during 1960 to 1999 (Fig. 1). For example, the mean total number of new estimates per year rose over ten-fold, from about 18 in the 1960s to almost 200 in the 1990s. Clearly interest in C-values, as judged by the mean annual output of new data, continues to increase.

A further measure of the use of C-value estimates comes from how often they are cited. Analysis of the Science Citation Index shows that the first collected list (Bennett and Smith, 1976) has now been cited over 650 times, including 239 times in the last 5 years (1995–1999) (Fig. 2). Moreover, by 1999 the two most recently published lists (Bennett and Leitch, 1995, 1997) already had 94 and 22

citations listed, respectively. Altogether the various lists have been cited over 1060 times.

The Angiosperm DNA C-values database available on the internet (<http://www.rbgekew.org.uk/cval/database1.html>) has automatic logging of the e-mail address, taxonomic query, and number of species' C-values supplied (including zero), for all enquiries. The log shows that there were 6955 successful scientific enquiries in the first 18 months, and over 10 000 in the 16 months after release 2.0 went live in October 1998. So there is also a large and growing use of C-value data by this means.

Examining the database log and the Science Citations Index of DNA C-value reference lists reveals a wide range of countries and disciplines using these data. C-value enquiries logged in 1999 came from at least 43 countries on five continents. Moreover, since 1995 the DNA C-value reference lists were cited, or provided data used for comparative studies at levels ranging from the biosphere to genome organization and the size of introns, and in many diverse disciplines including: taxonomy and systematics (Kiehn, 1995; Ebert *et al.*, 1996; Cox *et al.*, 1998; Ohri *et al.*, 1998); genome evolution and phylogeny (Bennetzen and Kellogg, 1997; Bennetzen *et al.*, 1998; Kellogg, 1998; Leitch *et al.*, 1998; Voytas and Naylor, 1998; Vinogradov, 1999); ecology and the environment (MacGillivray and Grime, 1995; Bennett *et al.*, 1998); genomics (Dunford *et al.*, 1995; Moore, 1995; Foote *et al.*, 1997; Geisler *et al.*, 1999; Somerville and Somerville, 1999); plant breeding (Riera Lizarazu *et al.*, 1996); cell and molecular biology (Dean and Schmidt, 1995; Jeddloh and Richards, 1996; Vershinin and Heslop-Harrison, 1998); conservation (Rejmanek, 1996; Bennett and Leitch, 2000); and physiology and development (Butterfass, 1995; Xia Xh, 1995; Bharathan, 1996; Convey, 1996; Raven, 1999). Some of these uses are described in more detail below. Several authors have recently noted a need for additional C-value data for more plant species in order to extend their comparative studies. For example, specific needs were for more grass taxa (Jasienski and Bazzaz, 1995), and for more higher order taxa among angiosperms (Leitch *et al.*, 1998).

#### IDENTIFYING GAPS IN OUR KNOWLEDGE OF PLANT C-VALUES

Given the broad and growing demand for plant DNA C-values it is clearly important to monitor what is known, and to recognize what is unknown and needed most (Bennett, 1998). Consequently, a first key aim of the 1997 workshop was to identify major gaps in our knowledge of plant DNA C-values and to recommend targets and priorities for new work to fill them by international collaboration. Presentations on regional floras, and analysis of representation of data in the Angiosperm DNA C-values database, highlighted huge gaps in our knowledge, both in terms of the low numbers of species represented, but also in terms of systematic, life form, ecological and geographic representation. For example, a first DNA C-value estimate was still unavailable for the large majority (approx. 68 %) of angiosperm families (Table 1).

TABLE 1. The level of representation at different taxonomic levels for the 2802 species listed in the Angiosperm DNA C-values database in September 1997

| Taxonomic level | Number recognized | Number with DNA C-values available | Representation (%) |
|-----------------|-------------------|------------------------------------|--------------------|
| Families        | approx. 475*      | 151                                | approx. 31.8       |
| Genera          | approx. 13 479*   | 772                                | approx. 5.7        |
| Species         | approx. 250 000†  | 2802                               | approx. 1.1        |

\* Brummitt (1992); † Maberley (1997).

TABLE 2. The level of representation of C-value data for non-angiosperm plants in September 1997

| Group         | Number of species recognized | Number of species with DNA C-values available | Representation (%) |
|---------------|------------------------------|-----------------------------------------------|--------------------|
| Gymnosperms   | approx. 730*                 | 117                                           | approx. 16.03      |
| Pteridophytes | approx. 9250†                | 39                                            | approx. 0.42       |
| Bryophytes    | approx. 18 400‡              | 18                                            | approx. 0.10       |

\* Murray (1998); † Maberley (1997); ‡ Schofield (1995).

At the workshop Murray reviewed our knowledge of C-values in non-angiosperm plants where, in some groups, there were not 'intermittent gaps' but almost 'one continuous gap' (Table 2). Representation was much better for gymnosperms than angiosperms, as values were published for approx. 16 % of gymnosperm species (Murray, 1998) compared with approx. 1 % for angiosperms. The situation was worse for pteridophytes (approx. 0.42 %), and almost no C-value data were known for bryophytes (approx. 0.1 %), although locating data for these two groups had proved very difficult [e.g. 23 of the 39 C-values known for pteridophytes were published only in a Ph.D thesis (Bouchard, 1976)].

The workshop concluded that this level of ignorance was unsafe and unacceptable. New targeted work was essential to improve representation of both the angiosperm flora and of the other least-known plant groups. The difficulties encountered in locating DNA amount data for review at the workshop clearly demonstrated the value of user-friendly reference works. Thus, there was a clear need to bring together DNA amount data for species in other groups besides angiosperms, and make them easily accessible in one plant C-values database.

Long-term and 5-year targets were set. The ideal of a C-value for every taxon is unrealistic. However, estimates for 10–20 % of plants seemed both ultimately achievable and adequate for all conceivable uses, provided these were carefully targeted to represent the various taxonomic groups, geographical regions, and life forms in the global flora. C-values for about 2800 (approx. 1 %) angiosperm species had been estimated in the last 40 years. However, a 5-year target of estimating first C-values for the next 1 % of angiosperm species (i.e. an additional 2500 species) by 2002

seemed possible and was therefore recommended. Meeting this target would require on average at least 500 first C-value estimates per year.

#### FILLING MAJOR GAPS IN OUR KNOWLEDGE OF PLANT C-VALUES

##### *Recent progress towards meeting the targets for angiosperms*

Only 33 months elapsed between closing the angiosperm C-value list for Bennett and Leitch (1997) in January 1997, and for the present work in October 1999. This paper lists first DNA C-values for 691 angiosperm species known to us (520 published in papers dated 1997–1999), so an average of at least 165 first estimates for such species was published per annum in this period. On past record this is an underestimate, as about 25% of the values estimated in such a period are missed or uncommunicated, but are included in a later supplement (N.B.  $520/691 = 75.3\%$ ). If so, at least 220 first estimates were published in each recent year. How does this compare with the long-term historical rate, recent trends, and with the target set at the 1997 workshop?

The total number of angiosperm species whose C-values are listed in the pooled Angiosperm DNA C-values database and the present work is 3493, published since 1960 at an average rate of about 85 per year. Numbers fluctuate considerably between years (Bennett and Leitch, 1995). However, analysis shows a continuing strong increase in the mean number of 'prime' estimates (usually the first) for species (Fig. 1) listed in the four successive decades from 1960–1999. The mean total number of 'new/prime' estimates per year rose steadily from 8.6 in the 1960s to almost 140 in the 1990s, reaching 165.4 in 1995–99, and 203 in 1998–99. Thus, the output of such values is rising in the long term, and increasingly so in recent years.

Clearly, good progress has been made towards achieving the target set at the 1997 workshop. First C-value estimates for angiosperm species are being published at the highest rate known (approx. 220 per annum), but even at this record rate the total number of such values estimated by 2002 (approx. 1100) would be <50% of the minimum (2500) target set. To reach this target, output of first C-value estimates for angiosperms must triple to about 600 per annum in 2000–2002. Normally at least 2 years elapse between planning C-value research and publishing new data. Work influenced by the September 1997 workshop would not appear before late 1999, so its impact on annual output should be very minimal so far. Whether the target set in 1997 has been influential in raising the annual output of first C-values for angiosperm species significantly above the historical trend may be unclear before 2002.

It is also important to monitor other qualitative aspects of new C-value estimates. Bennett and Leitch (1995) noted a need for new work to focus on obtaining first C-values for species rather than unnecessarily multiplying DNA estimates for taxa whose C-values are already well known. Analysis shows (Fig. 3) that while the proportion of C-values for 'new' taxa tended to fall (from approx. 80% to approx. 60%) in the 1970s and 1980s, it has tended to

rise again (from approx. 60 to approx. 80%) in the 1990s, since this problem was first noted. Indeed the proportion of such C-values in the present Appendix ( $691/807 = 85.6\%$ ) is encouragingly high.

Bennett and Leitch (1995) noted that none of the 269 original references to DNA C-values listed was from China, and this remained so for 306 original references listed before the 1997 workshop. However, the present work includes values for taxa of *Vicia* from North East China (Li and Liu, 1996) and for grain amaranths (Sun *et al.*, 1999), both by first authors in China. It also lists the first estimates contributed with first authors of original sources from several other countries including: Bulgaria (Dimitrova *et al.*, 1999), Croatia (Zoldoš *et al.*, 1998), Finland (Antonius and Ahokas, 1996; Bukhari, 1997; Keskitalo *et al.*, 1998) and Turkey (Akpinar and Yildes, 1999), besides Ethiopia (Ayele *et al.*, 1996) and Colombia (Martínez *et al.*, 1994). Such work is now less concentrated in a few first world countries like the UK (down from 29.7% of 306 original sources previously, to 11.4% for the present Appendix), but Africa remains an unexplored continent. Whereas six out of 377 original sources have first authors with addresses in Africa, still none has an angiosperm C-value estimated in Africa, as all six report work done in Europe or the USA. More encouragingly, C-values for 42 *Lonchocarpus* (Leguminosae) taxa represent the first large sample (31% of species) from a tropical arboreal genus (Palomino and Sousa, 2000). Moreover, nuclear DNA amounts for 41 primitive dicot species (Morawetz and Samuel, pers. comm.) more than doubled our knowledge of C-values in this important phylogenetic group as values for only 31 species were known previously.

Bennett and Leitch (1997) also noted a need to target new work to achieve better systematic representation, as no estimate was available for about 68% of angiosperm families. The 1997 workshop confirmed this, and set a

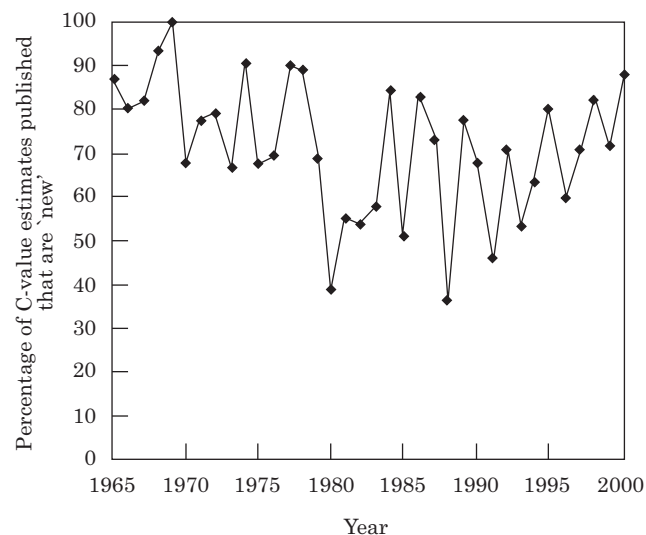

FIG. 3. Percentage of DNA C-value estimates published or communicated during 1965–2000 that are first values for species listed in the Angiosperm DNA C-values database (Bennett *et al.*, 1997) or the present work.

target of complete familial coverage by 2002. The present Appendix lists first C-values for 12 families unrepresented on previous lists (namely: Anemarrhenaceae, Calycanthaceae, Canellaceae, Chloranthaceae, Eupomatiaceae, Hernandiaceae, Juglandaceae, Monimiaceae, Myristicaceae, Paeoniaceae, Phytolaccaceae and Schisandraceae). This is useful progress, but it shows that less than 2% of the 691 first C-value estimates for angiosperms listed in the present Appendix were targeted on new families. The need to improve representation at the family level remains, so work targeted to fill this gap for 50 unrepresented families by 2001 is ongoing at RBG, Kew.

#### *Recent progress towards meeting the target for non-angiosperms*

The 1997 workshop concluded that new work on other plant groups besides angiosperms was essential, and there was a clear need to bring together published C-value data for these groups and to make them easily accessible. Soon afterwards a list of DNA C-values for 117 gymnosperm species was published (Murray, 1998), making them available in a user-friendly form as a reference source for the first time. These data, with their associated information were presented in a table similar to that used for angiosperm C-values in recent papers (Bennett and Leitch, 1995, 1997). This standard format was adopted to help users move easily from one to the other, and to facilitate combining them into a unified plant DNA C-values database in 2000.

Murray (1998) listed C-values for 12 out of 17 gymnosperm families, noting that systematic coverage was very uneven, and that 'the order Gnetales would appear to be a group where more measurements of genome size are needed if any meaningful phylogenetic relationship in genome size is to be revealed'. Few C-values have been estimated for gymnosperms since 1997. Hall *et al.* (2000) give values for 11 *Pinus* taxa from Central America, which include eight species not previously listed by Murray (1998). Estimates for six previously unlisted *Ephedra* species (Gnetales) were also made (Winfield and Leitch, unpubl. res.). Thus, scope remains to improve the systematic coverage of gymnosperms, with first C-values for the five as yet unrepresented families being addressed at RBG, Kew as a prime target.

Published estimates of C-values for pteridophytes remained rare in the 1990s. Tan and Thompson (1990) gave C-values for several subgroups in the genus *Pteridium* (including *P. aquilinum* and *P. esculentum*). Recently C-values for eight species in the Aspleniaceae (Redondo *et al.*, 1999a) and three *Polypodium* species (Redondo *et al.*, 1999b) were published. The need for targeted work on C-values in pteridophytes seems undiminished.

The most significant recent advance in systematic coverage is for mosses (Bryatae) where estimates for only about ten species were known before 1997 (Reski *et al.*, 1994; Renzaglia *et al.*, 1995). Since 1997, estimates for a further 34 species were published (Lamparter *et al.*, 1998; Tensch *et al.*, 1998, 1999; Zouhair and Lecocq, 1998). Voglmayr (2000) estimated C-values for 289 accessions of 138

different moss taxa in 34 families in a carefully targeted study whose main aim was to cover a representative spectrum of moss taxa. This benchmark study showed that 1C-values in these bryophytes varied only about 12-fold (from 0.174 to 2.16 pg), which is remarkable compared with about 1000-fold variation in angiosperms. Moreover, the relative constancy of C-values in many genera and families suggests that the incidence of secondary polyploidy among mosses is much lower than has been claimed (Ramsay, 1983; Voglmayr, 2000). These results agree with those obtained by Renzaglia *et al.* (1995) for 17 bryophyte species (hornworts, liverworts and mosses) showing only 24-fold variation. Renzaglia *et al.* (1995) suggested that selection for a narrow range of low C-values may act on the reduced efficiency of biflagellate motile sperm cells with increasing ploidy level and/or DNA C-values.

Together, the new work already completed or known to be in hand suggests that the recommendations of the 1997 workshop will have been influential in achieving some significant improvement in our knowledge of, and access to, DNA C-values in non-angiosperm groups. Thus, by 2001 we plan to release a first electronic plant DNA C-values database combining data for at least 325 species of pteridophytes, bryophytes and gymnosperms, and about 3500 angiosperms.

#### TECHNICAL TRENDS AND LIMITING FACTORS IN C-VALUE WORK

##### *Recent trends in methods of choice for plant C-value estimation*

Limited space precludes an analysis of all the technical recommendations of the 1997 workshop, so discussion here is limited to a few key points. Further details are given on the web [<http://www.rbgekew.org.uk/cval/conference.html> (under Angiosperm Genome Size Discussion Meeting)].

Several authors have discussed the choice of material(s) for use as calibration standard(s) to estimate C-values in plants, and/or the reliability of their assumed C-values (Bennett and Smith, 1976; Price *et al.*, 1980; Greilhuber and Ebert, 1994; Bennett and Leitch, 1995; Johnston *et al.*, 1999). Bennett and Leitch (1995) stated: (1) that ideally only one strain of a standard species from a single source should be used to improve comparability between laboratories; (2) for technical reasons several species are needed whose DNA C-values are distributed at suitable intervals over the large range of C-values known for plants; and (3) such calibration standards should all be calibrated against one base calibration standard. This 'ideal' is approached by the use of *Allium cepa* 'Ailsa Craig' and of defined cultivars of several other species all calibrated against it (Bennett and Smith, 1976). As noted by Bennett *et al.* (2000), *Allium cepa* has been informally adopted by common usage as the main calibration standard for C-value estimations in angiosperms. At least 143 (= 46.7%) of 306 original sources of data listed in Bennett *et al.* (1997) used *A. cepa* with an assumed 4C DNA amount of 67.1 (or 67.0) pg, as a calibration standard.

Calibration standards are of fundamental importance for accurate plant C-value estimations. Indeed, many discrepancies in C-values reported for the same species probably reflect problems associated with the choice and use of calibration standards rather than genuine intraspecific variation. C-values for chicken red blood cells (CRBC) vary between authorities and breeds. Moreover, CRBC show different hydrolysis curves from plants (Johnston *et al.*, 1999). In view of these problems the 1997 workshop recommended that animal standards, such as CRBC, should not be used as calibration standards for estimating plant C-values.

The characteristics of ideal plant calibration standards were discussed. It was agreed that they should be diploid (to minimize variation owing to aneuploidy), single cultivars of a species, easily available from more than one source, stable, and suitable for both flow cytometry and Feulgen microdensitometry. Three basic standards conforming to these criteria were recommended at the workshop (*Allium cepa* 'Ailsa Craig', *Hordeum vulgare* 'Sultan', and *Pisum sativum* 'Minerva Maple'). Collaborative work to identify and agree other suitable calibration standards is needed. Candidates included: *Raphanus sativus*, *Lycopersicon esculentum* and *Vicia faba*.

Analysis shows that 77.2% of DNA estimates in the Appendix of the present work were made using a plant calibration standard, but 22.8% used an animal calibration standard. Thus, the recommendation made by Price *et al.* (1980) and confirmed at the 1997 workshop is only partly followed as yet. However, while 97.1% of estimates based on an animal calibration standard used one species (chicken), estimates based on plant standards used many taxa for calibration [see (b) and (e) in 'Notes to the Appendix'], and no one species predominated. Analysis of the data in the Appendix shows that 237 such estimates (25.7%) used *Hordeum vulgare*, 235 (25.6%) used *Allium cepa*, but only 55 (6.0%) used *Pisum sativum*. Thus, >57% of such estimates used the three plant species recommended in 1997 as calibration standards.

Work to improve further the accuracy and reliability of, and confidence in, plant calibration standards has begun (e.g. Johnston *et al.*, 1999; Bennett *et al.*, 2000). It has also been suggested that extra calibration standards are needed which readily produce seed in tropical conditions (Guerra, pers. comm. 1998). Recommended standards which thrive in temperate environments (e.g. *Pisum sativum*, *Allium cepa* and *Hordeum vulgare*) can be difficult to maintain in tropical conditions.

A key observation regarding flow cytometry was that co-chopping of tissues from a calibration standard and an unknown is essential, as using an external standard to estimate C-values can cause unacceptable errors (Price, pers. comm. 1998). The 1997 workshop also recommended that the non-base specific intercalating stain propidium iodide be used as the fluorochrome of choice for DNA estimations by flow cytometry, at a concentration of 50 to 70 ppm. Analysis of the fluorochromes used to estimate C-values among the 447 taxa in the Appendix studied using flow cytometry (Table 3) shows that 390 and 50 (i.e. over 98%) used propidium iodide or ethidium bromide,

respectively, while only four and three used mithramycin or DAPI, respectively. These proportions represent a major shift from earlier work (Table 3). Thus, the advice to use non-base specific fluorochromes rather than base specific fluorochromes (Doležel *et al.*, 1992, 1998; Bennett and Leitch, 1995) which was recommended as best practice by the recent workshop, is now widely followed. Moreover, the use of propidium iodide (as the fluorochrome of first choice) outstrips that of ethidium bromide by almost 8:1, which may reflect health and safety concerns as the latter is a known frame shift and UV-sensitive mutagen in man.

Bennett and Leitch (1995, 1997) compared strengths and weaknesses of flow cytometry and Feulgen microdensitometry as the two main modern methods of choice for estimating DNA C-values in angiosperms, and described trends in their use. Analysis of the data for 919 C-value estimates in the present Appendix shows that 472 (51.4%) were obtained using Feulgen microdensitometry and 437 (48.6%) using flow cytometry. These proportions are similar to those for 469 estimates listed by Bennett and Leitch (1995) for original data published during 1990–1994, namely 51% flow cytometry and 49% Feulgen microdensitometry, but show a reduction in the proportion estimated by Feulgen microdensitometry from 65.6% for 629 taxa listed by Bennett and Leitch (1997). Nevertheless, these new data continue to confirm the conclusion (Bennett and Leitch, 1997) that despite its potential, flow cytometry is unlikely to replace Feulgen microdensitometry for estimating DNA C-values in the short term. Indeed, Feulgen methods will probably be preferred in many places, although an important imminent problem was identified at the workshop.

#### The 'obsolescence time bomb' threatening plant C-value research

A major factor likely to limit progress in plant C-value research is the 'obsolescence time bomb' of ageing microdensitometers. Several workers noted that the equipment they used for Feulgen microdensitometry was considered

TABLE 3. Analysis of the type of fluorochrome used to estimate C-values by flow cytometry in plant taxa listed in Bennett and Leitch (1995, 1997) and this paper

| Fluorochrome     | Number of C-values        |                           |            |
|------------------|---------------------------|---------------------------|------------|
|                  | Bennett and Leitch (1995) | Bennett and Leitch (1997) | This paper |
| Base-specific    |                           |                           |            |
| DAPI             | 27 (9%)                   | 34 (23%)                  | 3 (1%)     |
| Mithramycin      | 35 (12%)                  | 0 (0%)                    | 4 (1%)     |
| Subtotal         | 62 (21%)                  | 34 (23%)                  | 7 (2%)     |
| Intercalating    |                           |                           |            |
| Ethidium bromide | 37 (13%)                  | 13 (9%)                   | 50 (11%)   |
| Propidium iodide | 195 (66%)                 | 104 (69%)                 | 390 (87%)  |
| Subtotal         | 232 (79%)                 | 117 (77%)                 | 440 (98%)  |
| Total            | 294 (100%)                | 151 (100%)                | 447 (100%) |

DAPI, 4',6-diamidino-2-phenylindole.

obsolete and close to irreparable failure. For example, a high proportion of new C-value estimates were estimated using Vickers M85 microdensitometers made in the 1980s but now unsupported by the manufacturer. Without replacements there was already a serious risk that C-value estimation may cease in several countries (Mexico, Argentina etc.), so preventing regional and global targets from being met. Specialist replacement microdensitometers, developed mainly for medical purposes, are expensive, probably prohibitively so, especially for developing countries. Two alternative technologies considered were flow cytometry, provided that a rugged, low-cost machine suited for conditions in developing countries becomes available, and computerized image analysis systems. In 1997 the latter seemed too expensive for most users, but recently several papers have presented C-value estimates for angiosperms (Dimitrova *et al.*, 1999), bryophytes (Temsch *et al.*, 1998) and fungi (Voglmayr and Greilhuber, 1998), obtained using a basic video-based image analysis method. Unlike flow cytometry, where nuclei are unseen by the operator and chromosome numbers must be checked in separate cytological studies, this method is highly advantageous, allowing chromosome number and ploidy level to be assessed directly in Feulgen-stained nuclei on the same slide used to estimate C-values. Thus, Feulgen staining seems likely to continue as a method of choice but will increasingly use computerized image analysis techniques.

#### *Connecting C-values given only in arbitrary units with the database*

About 10% of all angiosperm DNA estimates have been published only in arbitrary units and do not connect with a database for taxa given in absolute units. Action to avoid wasting so much potential information is worthwhile. The importance of including a taxon of known C-value as a calibration standard in work to study DNA amounts in taxa where this is unknown to maximize the value of the work has often been noted (Bennett and Smith, 1976, 1991). Analysis of the new data in the Appendix shows that the practice of publishing relative DNA amounts in arbitrary units alone is now generally defunct. Data from only two original references giving DNA amounts in arbitrary units are included in the Appendix. However, both were published in 1984. These data for 37 *Carex* and 12 Marantaceae species were all converted to absolute values in our laboratory [see Appendix footnotes (ao) and (ap)]. Overall, using this approach, we have brought absolute C-values for 490 species (14% of the total) onto the quantitative list since 1976, and this contributes 'prime' values for 343 species (9.8% of the total) in the Angiosperm DNA C-values database and the present work. More opportunities to increase substantially our knowledge of C-values in this way seem unlikely, as we are unaware of further references giving significant numbers of prime DNA estimates in arbitrary units alone. However, we would welcome information of references or unpublished data of any further bodies of such data if, as seems likely, some examples still exist.

## MODERN USES OF PLANT C-VALUE AND GENOME SIZE DATA

### *DNA C-values in modern molecular practice*

DNA C-value remains a key character in biology and biodiversity. Genome size has many important practical implications at many different levels. For example, species with large DNA amounts (i.e. 1C greater than 20 pg) can be problematic when studying genome diversity using the standard AFLP™ technique [designed for genomes of 500–6000 Mbp (approx. 0.5–6 pg); Perkin-Elmer, 1996] with three selective bases on each primer, and it may be necessary to increase the number of selective bases or to change the restriction enzymes. AFLP traces for *Cypripedium calceolus* using the standard protocol are suboptimal (Fay and Cowan, pers. comm.) as a result of its large DNA amount (1C = 32.4 pg—see Appendix). Similar problems have been encountered by Han *et al.* (1999) in *Alstroemeria* species (1C = approx. 22 pg), and by Costa *et al.* (2000) in *Pinus pinaster* (1C = 24 pg).

Moreover, possession of a very small DNA content has been a major factor in determining which taxa were chosen as the first candidates for genome sequencing, and which chromosome(s) in the karyotypes of various organisms were sequenced first. *Arabidopsis thaliana* was the first plant chosen for genome sequencing, partly because it had one of the smallest C-values known for an angiosperm (NSF, 1990; Anderson, 1991). A grass in the genus *Brachypodium* (e.g. diploid *B. distachyon*—1C = 0.25–0.3 pg) was proposed as a first monocot for genome sequencing on similar grounds (Bablak *et al.*, 1995; Catalan *et al.*, 1995), but rice (*Oryza sativa*, 1C = approx. 0.5 pg) was chosen because it has the smallest C-value among the world's major cereal crops (Sasaki, 1998; Somerville and Somerville, 1999). In 1999 DNA sequences were published for the first human chromosome (number 22) as part of the human genome project (Dunham *et al.*, 1999), chosen because it is one of the smallest human chromosomes. Among autosomes only chromosome 21 is smaller (Little, 1999) and its DNA sequence was also recently published (Hattori *et al.*, 2000).

Estimates of the 1C-value for *Arabidopsis thaliana*, often taken for convenience by molecular biologists as about 100 Mbp (=approx. 0.1 pg), have increased from about 70 Mbp (Leutwiler *et al.*, 1984; Marie and Brown, 1993) to 130–155 Mbp (Arumuganathan and Earle, 1991; Somerville and Somerville, 1999), or higher (1C = approx. 0.19 pg; Doležel *et al.*, 1998), and hence towards the values obtained by Feulgen microdensitometry (0.175 pg = 170 Mbp, re-estimated by Bennett and Smith, 1991; 0.167 pg = 162 Mbp, Krisai and Greilhuber, 1997). Summing DNA sequences for each *A. thaliana* chromosome will soon yield a first angiosperm C-value based on this new approach, but it will still be a best estimate based on assumptions, as several segments containing repeated DNA sequences will remain unsequenced as gaps.

### *DNA C-values and mechanisms in genome size evolution*

Genome sizes range over five orders of magnitude in eukaryotes (Cavalier-Smith, 1985), and approx. 1000-fold

in angiosperms (Bennett and Smith, 1976). However, we are still unsure in theory or practice what are the smallest and largest C-values and/or genome sizes for taxa in different groups of organisms. Leutwiler *et al.* (1984) put the theoretical minimum C-value for an angiosperm at about  $1C = 0.025$  pg (assuming 15 000 different genes and an average of 1.5 kb of DNA per gene) and suggested that diploid *Arabidopsis thaliana* (assumed  $1C = 0.07$  pg) approached that limit within three–four fold. However, it was recently shown that duplications cover considerably more than half of the genome and at least 30% of *A. thaliana* genes are duplicated, raising the intriguing possibility that it could be a degenerate tetraploid (Blanc *et al.*, 2000). If so, diploids with only half the C-value of *A. thaliana* may exist, approaching the theoretical minimum more closely. The report that *Rosa wichuriana* had a  $1C$  DNA amount of only 0.05 pg (Bennett and Smith, 1991) must now be discounted as an artefact, perhaps caused by self-tanning, as Yokoya *et al.* (2000) recently estimated this taxon as  $1C = 0.55$  pg. Another angiosperm C-value below 0.1 pg is known ( $1C = 0.05$  pg for the crucifer *Cardamine amara*; S.R. Band pers. comm.—listed in Bennett and Smith, 1991), but its validity needs confirmation. With estimates available for only about 1% of species, the full range of C-values and genome sizes in angiosperms is still uncertain (Bennett, 1998) and may include taxa with amounts significantly larger or smaller than those already known.

What determines C-value size, and how genome size is controlled, is an ongoing debate (Beaton and Cavalier-Smith, 1999). In particular there is considerable interest in the molecular mechanisms responsible for the gain or loss of DNA. Kubis *et al.* (1998) proposed that changes in nucleosome structure and size (including potentially species-specific modifications such as histone acetylation under genetic control) may be a driver to directional changes in DNA amount. They found small differences in the average size of repeated DNA sequences coiled around nucleosomes between wheat and rye (Vershinin and Heslop-Harrison, 1998). If one repeated sequence is more stable in packing around a particular nucleosome structure and size, then its amplification could be favoured over others, leading to the gain or loss of DNA.

There is considerable new evidence for the role of retrotransposons and satellite DNA in enlarging the amount of repeated sequences and therefore DNA C-value. Elegant work on *Zea mays* has described how different retrotransposons have sequentially inserted one within another, in ‘Russian doll’ fashion, and then spread in its genomes (SanMiguel *et al.*, 1998). This phenomenon can be used as a type of molecular clock to study the sequence and timing of such events in genome evolution (Voytas and Naylor, 1998). Knowledge of this process, coupled with some phylogenetic comparisons for grasses, led Bennetzen and Kellogg (1997) to ask if plants have a one-way ticket to genomic obesity. This idea was based on the current ‘absence of a known mechanism that could substantially reduce nuclear DNA content in plants’. However, they noted that a failure to identify such processes ‘does not indicate of course that such a

mechanism is not present’. C-values may often tend to grow by such processes until selection acts on some nucleotypic character(s) related with C-value (Bennett, 1987a).

There is also good reason to believe that C-values can often decrease during evolution, although better knowledge is needed of the molecular mechanisms involved. Evidence that DNA loss can occur has been seen at the cytological level. Deletion of segments of heterochromatin from *Secale* chromosomes, known to contain highly repeated DNA sequences visible in the light microscope, were seen in *Triticale*, leading to a reduced C-value detectable by Feulgen microdensitometry (Gustafson *et al.*, 1983). Such losses, each equivalent to one–three complete *Arabidopsis* genomes, need not be detrimental to fitness. Indeed, the resulting line may be improved, as judged by the award of plant breeders rights (Bennett, 1985). Such loss was due to chromosome breakage, and may be associated with incomplete late DNA replication, although the precise molecular mechanism is uncertain. Work on insects gives an interesting insight into DNA loss at the molecular level. Petrov *et al.* (2000) tested the hypothesis that some variation in genome size can be attributed to differences in the pattern of insertion and deletion (indel) mutations among organisms. They compared the indel spectrum in *Laupala* crickets, whose genome size is 11 times larger than that of *Drosophila*. DNA loss of non-transposing copies of a ‘dead on arrival’ pseudogene was 40 times slower in the former than in the latter. They concluded that some differences in haploid genome size may result from variation in the rate of spontaneous loss of non-essential DNA.

An interesting question meriting further research concerns the proportion and parts of the genome that are dispensable in taxa with specialist life styles. Insights into molecular mechanisms influencing genome size evolution may be obtained from studies of genomes in highly specialized taxa, such as parasites and symbionts. Gilson and McFadden (1997) reported that the vestigial nucleus of a chlorarachniophyte endosymbiont, termed the nucleomorph, had a haploid genome size of 380 kbp—then ‘the smallest eukaryotic genomes known’. [The smallest eukaryote genome known now is 225 kbp (Beaton and Cavalier-Smith, 1999) in the microsporidian *Encephalitozoon intestinalis*.] They described its stripped-down eukaryotic genome, only a little larger than some chloroplast genomes, as the quintessence of compactness whose features included overlapping genes. Intensive reductive pressures had apparently squeezed spliceosome-type introns down to only 18–20 bases in length. Comparing nuclear and nucleomorph genome sizes shows such reductive pressures in natural selection can readily eliminate functionless nuclear DNA, refuting ‘selfish’ and ‘junk’ theories of secondary DNA (Beaton and Cavalier-Smith, 1999).

Comparisons of related diploids and polyploids may also increase our knowledge of changes in DNA amount and of the mechanisms involved. All else being equal, the DNA amounts for polyploids are expected to increase in direct proportion to ploidy level. Tetraploids and hexaploids are expected to show double and treble the mean C-value for diploids. This expectation is obeyed in many polyploid



series, especially those newly formed, but the literature abounds with examples where genome size in polyploids is smaller than expected. While some of these are technical artefacts, others seem real (Ohri and Khoshoo, 1986). Moreover, analysis of 2452 angiosperm taxa of known ploidy showed that mean C-values for diploids and polyploids were more similar than expected. DNA amount did not increase in direct proportion with ploidy level, and mean DNA amount per basic genome actually decreased with increasing ploidy in many cases. Polyploidy is often associated with selection and adaptation for rapid cell development, which in turn is correlated with small C-values and genome size, as in ephemeral weeds such as *Arabidopsis thaliana* (Bennett *et al.*, 1998). If so, DNA loss may commonly occur from constituent genomes in many polyploids after their formation. The alternative explanation, that C-value and genome size increase in diploids but not in their derived polyploids seems unlikely. While the case for reduced genome size in many polyploids seems strong, more work is needed to confirm this at the molecular level and to describe the sequences involved.

Recent work has focused on how repetitive DNA sequences (both tandem and dispersed repeats) evolve in polyploids. Evidence from several polyploids including wheat (*Triticum*) and cotton (*Gossypium*) showed that they behave in a dynamic and varied manner undergoing various types of concerted evolution—the non-independent evolution of sequences at multiple loci (Wendel *et al.*, 1995; Hanson *et al.*, 1998). The mechanisms involved are not well understood but include unequal crossing over, gene amplification, gene conversion and replicative transposition. The extent to which intensive selection for a reduced genome size could drive concerted evolution has yet to be investigated but may help explain how changes in genome size following polyploidy could occur. The report by Liu *et al.* (1998) that allopolyploid formation in synthetic wheat is accompanied by rapid and non-random elimination of certain low copy non-coding DNA sequences in a genome-specific manner provides direct evidence that loss of DNA from genomes in polyploids does occur. Chenuil *et al.* (1997) noted that polyploid barbel fish (*Barbus*) had fewer and shorter microsatellites than their diploid relatives. They suggested that a bias in the mismatch repair system towards deletion could account for this, providing an efficient way of eliminating excess DNA in polyploids. Further, it was recently suggested that following polyploidy, extensive methylation and other gene silencing mechanisms are activated, in part, to repress the spread of transposable elements (Matzke and Matzke, 1998). Such methylated sequences could themselves also become targets for elimination, providing a further way to remove excess DNA from genomes in polyploids.

#### *C-value variation and constancy—a new C-value paradox?*

Differences in nuclear DNA amounts among organisms arise as variation between individuals within species. However, views on the incidence and magnitude of extant intraspecific variation in C-values remain hotly debated (Bennett and Leitch, 1995, 1997). New evidence on this

issue is too extensive to review here, but many reported examples were unrepeatable using the same materials (e.g. Greilhuber and Obermayer, 1997, 1998; Baranyi and Greilhuber, 1999) and probably reflect technical artefacts of one sort or another (Greilhuber, 1998). Consequent on such studies, the idea of the plastic genome has been questioned, at least with respect to its gross size (Greilhuber and Obermayer, 1998) though not with respect to its constituent DNA sequences, as the concept of relative genome size constancy within species has recently received new support (Baranyi and Greilhuber, 1999; Bennett *et al.*, 2000).

Part of the current interest in C-values and what determines genome size focuses on a tension between the massive variation in DNA amounts existing between taxa within the angiosperms, and the surprisingly high degree of genome constancy found in many widely distributed species, including the base calibration standard for estimating C-values—*Allium cepa* (Bennett *et al.*, 2000). In view of the molecular mechanisms now known which can rapidly generate considerable variation in DNA C-value and genome size (Kubis *et al.*, 1998; SanMiguel *et al.*, 1998), the degree of C-value constancy found in many species is remarkable, and needs explanation. Indeed, it is arguable that such constancy would not be expected without some mechanism(s) to select for constancy (or against drift) in C-value, which thereby controls variation in C-value back towards some encoded norm for each species. Were it not so, the frequency and extent of intraspecific variation in DNA amount would surely be much larger, and the observed degree of species DNA constancy would present a new C-value paradox (Bennett *et al.*, 2000). Genome size is widely perceived as free to vary, changes being undetected and uncorrected by internal control mechanisms. Yet many results challenge this view, suggesting instead that DNA amount may normally be subject to innate controls by 'counting' mechanisms which somehow detect, quantify and regulate genomic size characters within quite tightly defined or preselected limits (Bennett, 1987*b*; Bennett *et al.*, 2000).

Thus, C-value and genome size can be perceived as characters subject to a tight genotypic control, rather than as merely the end product of the interaction of evolutionary drift and natural selection against the consequences of disadvantageous obesity. DNA C-value can be perceived as a genetically set 'mould' within whose constraint different families of repeated sequences may compete and vary rapidly in identity and copy number, subject to their competitive strengths as preferred replicators, etc. This view sees nuclear DNA not only or just as the genotype, but as the environment of the essential information encoded in its genes, with its own ecology represented by different competing species of non-essential repetitive DNA elements.

#### *Using C-values to probe phylogenetic dimensions*

C-values are increasingly useful in a phylogenetic context. Much research has looked for evolutionary trends in DNA amount at the species, genus and family level, but

most studies were flawed by the lack of a rigorous phylogenetic framework on which to analyse the data. However, there is a phylogenetic component to genome size variation which needs evaluation before any evolutionary significance of C-value variation can be explained fully (Bharathan, 1996). New availability for angiosperms of both a DNA C-values database and a consensus higher level phylogeny recently opened the way for such studies, super-imposing data from the former on the latter (Cox *et al.*, 1998; Kellogg, 1998; Leitch *et al.*, 1998), which support a range of interesting conclusions. Leitch *et al.* (1998) compared C-value data for 152 families covering all four major subdivisions and 15 out of 20 higher level groups among angiosperms. Every higher level group for which data were available contained species with small C-values (3.5 pg or less) and (with one exception) very small C-values (1.4 pg or less). Species with large C-values (14.0 pg or more) were found in only six groups, while only two had very large C-values (35.0 pg or more). It seems that ancestral angiosperm genomes were small, whereas very large C-values represent a derived condition that arose at least twice in angiosperm evolution, in the higher eudicots and in the monocots (Bharathan, 1996; Leitch *et al.*, 1998). Such analysis not only provides information on the direction of genome size evolution in different plant groups but, as noted above, it can also provide a framework essential for directing studies on the mechanism(s) and timing of genome size changes at many taxonomic levels ranging from grass tribes (Kellogg, 1998), to species such as *Zea mays* (SanMiguel *et al.*, 1998; Voytas and Naylor, 1998).

#### *DNA amounts as predictors and indicators*

Nuclear DNA amount shows nucleotypic correlations with many widely different phenotypic and phenological characters at cell, tissue and organismic levels. C-value is, therefore, an important fundamental factor involved in scaling of living systems. The extensive literature on nucleotypic correlations is reviewed elsewhere (Bennett, 1973, 1987a; Cavalier-Smith, 1985). The 70 new original sources listed in the Appendix report or confirm several relationships between nuclear DNA amounts and widely different characters, including C-value and genomic chromosome volume in *Zingiber officinale* cultivars (Rai *et al.*, 1997) and C-value and nuclear size in *Hedysarum* taxa (Akpınar and Yildez, 1999). Among relationships with reproductive characters, C-value was directly correlated with chiasma frequency in *Mammillaria* species (Das *et al.*, 1997); and pollen diameter significantly correlated to DNA content for populations of *Armeria maritima* (Vekemans *et al.*, 1996) 'confirming the relationship between genome size and pollen size (Bennett, 1972), but at the intraspecific level'. Baranyi and Greilhuber (1999) found significant negative correlations between genome size and first month of flowering for *Allium* taxa, confirming the hypothesis (Grime and Mowforth, 1982) that species flowering very early in spring have large genomes. Significant negative correlations were also noted between DNA amount per nucleus or per genome and the probability of being a

recognized weed species (Bennett *et al.*, 1998). Correlations vary in 'tightness', but are often surprisingly close for biological systems and more reminiscent of chemical or physical relationships (Bennett, 1977). The closer the correlation between a character and C-value, the greater the utility of C-value data as a predictor.

#### *C-values as ecological or environmental indicators*

Clearly interest in C-values is not limited to biological matters internal to organisms, such as genome evolution, but extends to a broad range of external ecological issues and environmental concerns (Grime, 1983, 1996, 1998). Thus, DNA amounts are known to correlate with plant life histories (Bennett, 1972, 1987a), the geographical distribution of crop plants (Bennett, 1976), plant phenology (Grime and Mowforth, 1982; Grime *et al.*, 1985), biomass (Jasienski and Bazzaz, 1995), sensitivity of growth to environmental variables such as temperature and frost (Grime, 1983; MacGillivray and Grime, 1995), besides predicting changes in vegetation caused by long-term changes such as global warming (Grime, 1990, 1996). Moreover, C-value has been suggested as a prime predictor of the likely responses of vegetation to man-made catastrophes such as nuclear winter (Grime, 1986), or other nuclear incidents. Experimental results relating plant DNA amounts with known doses of ionizing radiation (Sparrow and Miksche, 1961; Underbrink and Pond, 1976) obtained at the Brookhaven National Laboratory in the 1960s and 1970s, were used to predict the effects of radiation on vegetation in the Ukraine after the accident at Chernobyl in 1986 (Van't Hof, pers. comm.).

#### *Using inferred C-values to reveal paleobiological trends*

Not only do C-values have predictive value based on their close relationships with phenotypic characters (Bennett, 1996, 1998), but conversely such correlations allow C-values to be predicted from such characters. For example, it seems possible to infer the genome content of fossils, as cell size is proportional to quantity of DNA. If so, in prospect is the possibility of investigating changes in genome size through geological time and on a macro-evolutionary scale encompassing the origin of major groups and the effects of extinctions. A pioneering survey of inferred variation in genome content in fossils was based on measurements of epithelial cells in extinct conodonts over a period of 270 million years (Conway Morris and Harper, 1988). These inferred C-values in extinct taxa vary by at least one, and perhaps two orders of magnitude (approx. 1–150 pg). Even when they entered their final Triassic decline, inferred C-values remained widely variable, showing no evidence that conodont extinction was linked to increasingly small genome size. Relationships between cell size and DNA amount also mean that sizes of defined cell types (such as stomatal guard cells) can be used to estimate DNA amounts in fossil plants, and to track evolutionary trends in C-values over geological time (Masterson, 1994).

## DNA amounts and their conservation interest

We face a mass extinction of biodiversity, losing plant species at 10 000 times the normal rate (May *et al.*, 1995). Knowledge of C-values and genome sizes may also be significant for conservation. Whether relationships exist between genome size and species loss is unknown, but it seems likely. Slow-developing gymnosperm taxa with long minimum generation times, which produce relatively few large seeds, are probably at increased risk of extinction (Rejmanek, 1996). These characters, obligately associated with very high C-values, occur in many perennial monocots. Massive C-values may identify over-specialized end products of evolutionary lineages with slim chances of a return from extreme genomic obesity, and also confer increased chances of extinction (Bennett and Leitch, 2000). Prospects for survival may reflect genome size more than C-value, and hence may be modified by ploidy level. We need to know if, for a given high C-value, diploids and polyploids are equally at risk. If so, because allopolyploidy is common, the loss of genomes may be proportionally more than the loss of species. However, if polyploids are more adaptable, and more likely to survive than parental diploids, as many have argued, then the proportion of polyploids among surviving taxa in the angiosperm flora will increase, while mean genome size (taken as C-value divided by ploidy level) will decrease during a wave of extinction.

## LITERATURE CITED

- Akpınar N, Yildez B. 1999. Nuclear DNA contents of some endemic *Hedysarum* L. species. *Turkish Journal of Botany* 23: 229–232.
- Anderson GC. 1991. Green scheme avoids quarrels. *Nature* 345: 654.
- Angiosperm Phylogeny Group. 1998. An ordinal classification for the families of flowering plants. *Annals of the Missouri Botanical Garden* 85: 531–553.
- Antonius K, Ahokas H. 1996. Flow cytometric determination of ploidy level in spontaneous clones of strawberries. *Hereditas* 124: 285.
- Arumaganathan K, Earle ED. 1991. Nuclear DNA content of some important plant species. *Plant Molecular Biology Reporter* 9: 208–219.
- Ayele M, Doležel J, van Duren M, Brunner H, Zapata-Arias FJ. 1996. Flow cytometric analysis of nuclear genome of the Ethiopian cereal *Tef* [*Eragrostis tef* (Zucc.) Trotter]. *Genetica* 98: 211–215.
- Bablak P, Draper J, Davey MR, Lynch PT. 1995. Plant regeneration and micropropagation of *Brachypodium distachyon*. *Plant Cell, Tissue and Organ Culture* 42: 97–107.
- Baranyi M, Greilhuber J. 1999. Genome size in *Allium*: in quest of reproducible data. *Annals of Botany* 83: 687–695.
- Barkworth ME, Dewey DR. 1985. Genomically based genera in the perennial Triticeae of North America: identification and membership. *American Journal of Botany* 72: 767–776.
- Beaton MJ, Cavalier-Smith T. 1999. Eukaryotic non-coding DNA is functional: evidence from the differential scaling of cryptomonad genomes. *Proceedings of the Royal Society of London B* 266: 2053–2059.
- Bennett MD. 1972. Nuclear DNA content and minimum generation time in herbaceous plants. *Proceedings of the Royal Society of London B* 181: 109–135.
- Bennett MD. 1973. Nuclear characters in plants: Basic mechanisms in plant morphogenesis. Brookhaven Symposium in Biology 25: 344–366.
- Bennett MD. 1976. DNA amount, latitude and crop plant distribution. *Environmental and Experimental Botany* 16: 93–108.
- Bennett MD. 1977. The time and duration of meiosis. *Philosophical Transactions of the Royal Society of London B* 277: 201–277.
- Bennett MD. 1985. Intraspecific variation in DNA amount and the nucleotypic dimension in plant genetics. In: Freeling M, ed. *UCLA symposia on molecular and cellular biology. New series volume 35, 'Plant genetics'*. New York: Alan Liss, 283–302.
- Bennett MD. 1987a. Variation in genomic form in plants and its ecological implications. *New Phytologist* 106 (Supplement): 177–200.
- Bennett MD. 1987b. Nucleotypic change and its consequences. *Symposium on mechanisms of karyotype evolution 'XIV International Botanical Congress', Berlin (West), Germany*, p. 153 (Abstract).
- Bennett MD. 1996. The nucleotype, the natural karyotype and the ancestral genome. In: Heslop-Harrison JS, ed. *Unifying plant genomes*. Symposia of the Society for Experimental Biology, Number L. Cambridge: Society for Experimental Biology, 45–52.
- Bennett MD. 1998. Plant genome values—how much do we know? *Proceedings of the National Academy of Sciences (USA)* 95: 2011–2016.
- Bennett MD, Leitch IJ. 1995. Nuclear DNA amounts in angiosperms. *Annals of Botany* 76: 113–176.
- Bennett MD, Leitch IJ. 1997. Nuclear DNA amounts in angiosperms—583 new estimates. *Annals of Botany* 80: 169–196.
- Bennett MD, Leitch IJ. 1998. Nuclear DNA amount and genome size in angiosperms. *Annals of Botany* 82 (Supplement A): 1.
- Bennett MD, Leitch IJ. 2000. Variation in nuclear DNA amount (C-value) in monocots and its significance. In: Wilson KL, Morrison DA, eds. *Monocots: systematics and evolution*. Melbourne: CSIRO, 137–146.
- Bennett MD, Smith JB. 1976. Nuclear DNA amounts in angiosperms. *Philosophical Transactions of the Royal Society of London B* 274: 227–274.
- Bennett MD, Smith JB. 1991. Nuclear DNA amounts in angiosperms. *Philosophical Transactions of the Royal Society of London B* 334: 309–345.
- Bennett MD, Cox AV, Leitch IJ. 1997. Angiosperm DNA C-values database. <http://www.rbgekew.org.uk/cval/database1.html>.
- Bennett MD, Johnston S, Hodnett GL, Price HJ. 2000. *Allium cepa* L. cultivars from four continents compared by flow cytometry show nuclear DNA constancy. *Annals of Botany* 85: 351–357.
- Bennett MD, Leitch IJ, Hanson L. 1998. DNA amounts in two samples of angiosperm weeds. *Annals of Botany* 82 (Supplement A): 121–134.
- Bennett MD, Smith JB, Heslop-Harrison JS. 1982. Nuclear DNA amounts in angiosperms. *Proceedings of the Royal Society of London B* 216: 179–199.
- Bennetzen JL, Kellogg EA. 1997. Do plants have a one-way ticket to genomic obesity? *Plant Cell* 9: 1509–1514.
- Bennetzen JL, SanMiguel P, Chen M, Tikhonov A, Francki M, Avramova Z. 1998. Grass genomes. *Proceedings of the National Academy of Sciences (USA)* 95: 1975–1978.
- Bharathan G. 1996. Reproductive development and nuclear DNA content in angiosperms. *Genome* 39: 379–394.
- Blanc G, Barakat A, Guyot R, Cooke R, Delseny M. 2000. Extensive duplication and reshuffling in the *Arabidopsis thaliana* genome. *Plant Cell* 12: 1093–1102.
- Blondon F, Marie D, Brown S. 1994. Genome size and base composition in *Medicago sativa* and *M. truncatula* species. *Genome* 37: 264–270.
- Bouchard RA. 1976. *DNA amount and organisation in some lower vascular plants*. PhD Thesis. University of Chicago, USA.
- Bräutigam S, Bräutigam E. 1996. Determination of the ploidy level in the genus *Hieracium* subgenus *Pilosella* (Hill) S.F. Gray by flow cytometric DNA analysis. *Folia Geobotanica and Phytotaxonomica* 31: 315–321.
- Brummitt RK. 1992. *Vascular plant families and genera*. Kew: Royal Botanic Gardens.
- Bukhari YM. 1997. Nuclear DNA amounts in *Acacia* and *Prosopis* (Mimosaceae) and their evolutionary implications. *Hereditas* 126: 45–51.
- Butterfass T. 1995. Reproduction and continuity of chloroplasts in spermatophytes. *Botanical Review* 61: 1–27.

- Catalan P, Shi Y, Armstrong L, Draper J, Stace CA. 1995. Molecular phylogeny of the grass genus *Brachypodium* P. Beauv. based on RFLP and RAPD analysis. *Botanical Journal of the Linnean Society* 117: 263–280.
- Cavaliere-Smith T. 1985. *The evolution of genome size*. Chichester: John Wiley and Sons.
- Ceccarelli M, Morosi L, Cionini PG. 1998. Chromocenter association in plant cell nuclei: determinants, functional significance, and evolutionary implications. *Genome* 41: 96–103.
- Chenuil A, Desmarais E, Pouyaud L, Berrebi P. 1997. Does polyploidy lead to fewer and shorter microsatellites in *Barbus* (Teleostei: Cyprinidae)? *Molecular Ecology* 6: 169–178.
- Convey P. 1996. Reproduction of Antarctic flowering plants. *Antarctic Science* 8: 127–134.
- Conway Morris S, Harper E. 1988. Genome size in Conodonts (Chordata): inferred variation during 270 million years. *Science* 241: 1230–1232.
- Costa P, Pot D, Dubos C, Frigerio JM, Pion C, Bodenes C, Berticchi E, Cervera M-T, Remington DL, Plomion C. 2000. A genetic map of maritime pine based on AFLP, RAPD and protein markers. *Theoretical and Applied Genetics* 100: 39–48.
- Cox AV, Abdelnour GJ, Bennett MD, Leitch IJ. 1998. Genome size and karyotype evolution in the slipper orchids (Cypripedioideae: Orchidaceae). *American Journal of Botany* 85: 681–687.
- Creber HMC, Davies MS, Francis D, Walker HD. 1994. Variation in DNA C value in natural populations of *Dactylis glomerata* L. *New Phytologist* 128: 555–561.
- Cremonini R, Colonna N, Stefani A, Galasso I, Pignone D. 1994. Nuclear DNA content, chromatin organization and chromosome banding in brown and yellow seeds of *Dasyphyrum villosum* (L.) P. Candargy. *Heredity* 72: 365–373.
- Cros J, Gavalda MC, Chabrilange N, Récalc C, Duperray C, Hamon S. 1994. Variations in the total nuclear DNA content in African *Coffea* species (Rubiaceae). *Café Cacao* 38: 3–10.
- Das AB, Mohanty S, Das P. 1997. Meiotic behaviour and nuclear DNA variation in some species of *Mammillaria* (Cactaceae). *Cytologia* 62: 253–257.
- De Rocher EJ, Harkins KR, Galbraith DW, Bohnert HJ. 1990. Developmentally regulated systemic endopolyploidy in succulents with small genomes. *Science* 250: 99–101.
- Dean C, Schmidt R. 1995. Plant genomes—a current molecular description. *Annual Review of Plant Physiology and Plant Molecular Biology* 46: 395–418.
- Dewey DR. 1984. The genomic system of classification as a guide to intergeneric hybridization with the perennial Triticeae. In: Gustafson JP, ed. *Gene manipulation in plant improvement. 16th Stadler Genetics Symposium, Columbia, MO*. New York: Plenum Press, 209–279.
- Dimitrova D, Ebert I, Greilhuber J, Kozuharov S. 1999. Karyotype constancy and genome size variation in Bulgarian *Crepis foetida* s.l. (Asteraceae). *Plant Systematics and Evolution* 217: 245–257.
- Doležel J, Sgorbati S, Lucretti S. 1992. Comparison of three DNA fluorochromes for flow cytometry estimation of nuclear DNA content in plants. *Physiologia Plantarum* 85: 625–631.
- Doležel J, Greilhuber J, Lucretti S, Meister A, Lysak MA, Nardie L, Obermayer R. 1998. Plant genome size by flow cytometry: Inter-laboratory comparison. *Annals of Botany* 82 (Supplement A): 17–26.
- Dunford RP, Kurata N, Laurie DA, Money TA, Minobe Y, Moore G. 1995. Conservation of fine-scale DNA marker order in the genomes of rice and the Triticeae. *Nucleic Acid Research* 23: 2724–2728.
- Dunham I, and 216 others. 1999. The DNA sequence of human chromosome 22. *Nature* 402: 489–495.
- Ebert I. 1993. *Systematische Karyologie und Embryologie von Prospero Salisb. und Barnardia Lindl. (Hyacinthaceae)*. PhD Thesis, University of Vienna, Austria.
- Ebert I, Greilhuber J, Speta F. 1996. Chromosome banding and genome size differentiation in *Prospero* (Hyacinthaceae): Diploids. *Plant Systematics and Evolution* 203: 143–177.
- Evans GM, Rees H, Snell CL, Sun S. 1972. The relation between nuclear DNA amount and the duration of the mitotic cycle. *Chromosomes Today* 3: 24–31.
- Foote T, Roberts M, Kuruta N, Sasaki T, Moore G. 1997. Detailed comparative mapping of cereal chromosome regions corresponding to the Ph1 locus in wheat. *Genetics* 147: 801–807.
- Galbraith DW, Harkins KR, Maddox JM, Ayres NM, Sharma DP, Firoozabady E. 1983. Rapid flow cytometric analysis of the cell cycle in intact plant tissues. *Science* 220: 1049–1051.
- Geisler R, and 40 others. 1999. A radiation hybrid map of the zebra fish. *Nature Genetics* 23: 86–89.
- Gilson PR, McFadden GI. 1997. Good things in small packages: the tiny genomes of chlorarachniophyte endosymbionts. *BioEssays* 19: 167–173.
- Greilhuber J. 1998. Intraspecific variation in genome size: a critical reassessment. *Annals of Botany* 82 (Supplement A): 27–35.
- Greilhuber J, Baranyi M. 1999. Feulgen densitometry: Importance of a stringent hydrolysis regime. *Plant Biology* 1: 538–540.
- Greilhuber J, Ebert I. 1994. On genome size in *Pisum sativum*. *Genome* 37: 646–655.
- Greilhuber J, Obermayer R. 1997. Genome size and maturity group in *Glycine max* (soybean). *Heredity* 78: 547–551.
- Greilhuber J, Obermayer R. 1998. Genome size variation in *Cajanus cajan* (Fabaceae): a reconsideration. *Plant Systematics and Evolution* 212: 135–141.
- Greuter W, Barrie FR, Burdet HM, Chaloner WG, Demoulin V, Hawksworth DL, Jørgensen PM, Nicolson DH, Silva PC, Trehane P, McNeil J. 1994. International code of botanical nomenclature (Tokyo Code) adopted by the Fifteenth International Botanical Congress, Yokohama, August–September 1993. *Regnum Vegetabile* 131.
- Grime JP. 1983. Prediction of weed and crop response to climate based upon measurements of nuclear DNA content. *Aspects of Applied Biology* 4: 87–98.
- Grime JP. 1986. Prediction of terrestrial vegetation responses to nuclear winter conditions. *International Journal of Environmental Studies* 28: 11–19.
- Grime JP. 1990. Ecological effect of climate change on plant populations and vegetative composition with particular reference to the British flora. In: Jackson M, Ford BV, Parry ML, eds. *Climatic change and plant genetic resources*. London: Belhaven Press, 40–60.
- Grime JP. 1996. Testing predictions of the impacts of global change on terrestrial ecosystems. *Aspects of Applied Biology* 45: 3–13.
- Grime JP. 1998. Plant classification for ecological purposes: is there a role for genome size? *Annals of Botany* 82 (Supplement A): 117–120.
- Grime JP, Mowforth MA. 1982. Variation in genome size—an ecological interpretation. *Nature* 209: 151–153.
- Grime JP, Shacklock JML, Band SR. 1985. Nuclear DNA contents, shoot phenology and species co-existence in a limestone grassland community. *New Phytologist* 100: 435–445.
- Gustafson JP, Lukaszewski AJ, Bennett MD. 1983. Somatic deletion and redistribution of telomeric heterochromatin in the genus *Secale* and in *Triticale*. *Chromosoma* 88: 293–298.
- Hall SE, Dvorak WS, Johnston JS, Price HJ, Williams CG. 2000. Flow cytometric analysis of DNA content for tropical and temperate New World pines. *Annals of Botany* 86 (in press).
- Han TH, van Eck HJ, De Jeu MJ, Jacobsen E. 1999. Optimization of AFLP fingerprinting of organisms with a large-sized genome: a study on *Alstroemeria* spp. *Theoretical and Applied Genetics* 98: 465–471.
- Hanson RE, Zhao X-P, Islam-Faridi MN, Paterson AH, Zwick MS, Crance CF, McKnight TD, Stelly DM, Price HJ. 1998. Evolution of interspersed repetitive elements in *Gossypium* (Malvaceae). *American Journal of Botany* 85: 1364–1368.
- Hattori M, and 61 others. 2000. The DNA sequence of human chromosome 21. *Nature* 405: 311–319.
- Hopkins AA, Taliaferro CM, Murphy CD, Christian D. 1996. Chromosome number and nuclear DNA content of several switchgrass populations. *Crop Science* 36: 1192–1195.
- Hopping ME. 1994. Flow cytometric analysis of *Actinidia* species. *New Zealand Journal of Botany* 32: 85–93.
- Horjales M, Redondo N, Pérez B, Brown S. 1995. Presencia en Galicia de *Dactylis glomerata* L. Hexaploide. *Boletim da Sociedade Broteriana (Ser. 2)* 67: 223–230.

- Hultquist SJ, Vogel KP, Lee DJ, Arumuganathan K, Kaeppler S. 1997. DNA content and chloroplast DNA polymorphisms among switchgrasses from remnant midwestern prairies. *Crop Science* 37: 595–598.
- Jasienski M, Bazzaz FA. 1995. Genome size and high CO<sub>2</sub>. *Nature* 376: 559–560.
- Jeddeloh JA, Richards EJ. 1996. (m)CCG methylation in angiosperms. *Plant Journal* 9: 579–586.
- Johnston JS, Bennett MD, Rayburn AL, Galbraith DW, Price HJ. 1999. Reference standards for determination of DNA content of plant nuclei. *American Journal of Botany* 86: 609–613.
- Jones RN, Brown LM. 1976. Chromosome evolution and DNA variation in *Crepis*. *Heredity* 36: 91–104.
- Jones WE, Kuehnle AR. 1998. Ploidy identification using flow cytometry in tissues of *Dendrobium* species and cultivars. *Lindleyana* 13: 11–18.
- Jones WE, Kuehnle AR, Arumuganathan K. 1998. Nuclear DNA content of 26 Orchid (Orchidaceae) genera with emphasis on *Dendrobium*. *Annals of Botany* 82: 189–194.
- Kellogg EA. 1998. Relationships of cereal crops and other grasses. *Proceedings of the National Academy of Sciences (USA)* 95: 2005–2010.
- Keskitalo M, Lindén A, Valkonen JPT. 1998. Genetic and morphological diversity of Finnish tansy (*Tanacetum vulgare* L., Asteraceae). *Theoretical and Applied Genetics* 96: 1141–1150.
- Kiehn M. 1995. Chromosome survey of the Rubiaceae. *Annals of the Missouri Botanical Garden* 82: 398–408.
- Kubis S, Schmidt T, Heslop-Harrison JS. 1998. Repetitive DNA elements as a major component of plant genomes. *Annals of Botany* 82 (Supplement A): 44–55.
- Krisai R, Greilhuber J. 1997. *Cochlearia pyrenaica* DC., das Löffelkraut, in Oberösterreich (mit Anmerkungen zur Karyologie und zur Genomgröße). *Beiträge zur Naturkunde Oberösterreichs* 5: 151–160.
- Lamparter T, Brückner G, Esch H, Hughes J, Meister A, Hartmann E. 1998. Somatic hybridisation with aphotrophic mutants of the moss *Ceratodon purpureus*: genome size, phytochrome reversibility, tip-cell phototropism and chlorophyll regulation. *Journal of Plant Physiology* 153: 394–400.
- Leitch IJ, Chase MW, Bennett MD. 1998. Phylogenetic analysis of DNA C-values provides evidence for a small ancestral genome size in flowering plants. *Annals of Botany* 82 (Supplement A): 85–94.
- Leutwiler LS, Hough-Evans BR, Meyerowitz EM. 1984. The DNA of *Arabidopsis thaliana*. *Molecular and General Genetics* 194: 15–23.
- Li R, Liu C. 1996. DNA content of some taxa of *Vicia* sect. *Vicilla* in northeast China. *Cytologia* 61: 225–228.
- Lindsay GC, Hopping ME, O'Brien IEW. 1994. Detection of protoplast-derived DNA tetraploid *Lisianthus* (*Eustoma grandiflorum*) plants by leaf and flower characteristics and by flow cytometry. *Plant Cell, Tissue and Organ Culture* 38: 53–55.
- Little P. 1999. The book of genes. *Nature* 402: 467–468.
- Liu B, Vega JM, Segal G, Abbo S, Rodova M, Feldman M. 1998. Rapid genomic changes in newly synthesized amphiploids of *Triticum* and *Aegilops*. I. Changes in low-copy non-coding DNA sequences. *Genome* 41: 272–277.
- Lu K, Kaeppler SM, Vogel KP, Arumuganathan K, Lee DJ. 1998. Nuclear DNA content and chromosome numbers in switchgrass. *Great Plains Research* 8: 269–280.
- Lysák MA, Doležal J. 1998. Estimation of nuclear DNA content in *Sesleria* (Poaceae). *Caryologia* 52: 123–132.
- Mabberley DJ. 1997. *The plant book*. Cambridge: Cambridge University Press.
- MacGillivray CW, Grime JP. 1995. Genome size predicts frost-resistance in British herbaceous plants—Implications for rates of vegetation response to global warming. *Functional Ecology* 9: 320–325.
- Marie D, Brown SC. 1993. A cytometric exercise in plant DNA histograms, with 2C values for 70 species. *Biology of the Cell* 78: 41–51.
- Martínez CP, Arumuganathan K, Kikuchi H, Earle ED. 1994. Nuclear DNA content of ten rice species as determined by flow cytometry. *Japanese Journal of Genetics* 69: 513–523.
- Masterson J. 1994. Stomatal size in fossil plants: evidence for polyploidy in majority of angiosperms. *Science* 264: 421–424.
- Matzke MA, Matzke AJM. 1998. Polyploidy and transposons. *Trends in Ecology and Evolution* 13: 241.
- May RM, Lawton JH, Stork NE. 1995. Assessing extinction rates. In: Lawton JH, May RM, eds. *Extinction rates*. Oxford: Oxford University Press, 1–24.
- Moore G. 1995. Cereal genome evolution—pastoral pursuits with lego genomes. *Current Opinion in Genetics and Development* 5: 717–724.
- Morgan ER, Burge GK, Seelye JF, Grant JE, Hopping ME. 1995. Interspecific hybridisation between *Limonium perigrinum* Bergius and *Limonium purpuratum* L. *Euphytica* 83: 215–224.
- Morgan ER, Burge GK, Seelye JF, Hopping ME, Grant JE. 1998. Production of inter-specific hybrids between *Limonium perezii* (Stapf) Hubb. and *Limonium sinuatum* (L.) Mill. *Euphytica* 102: 109–115.
- Murray BG. 1998. Nuclear DNA amounts in gymnosperms. *Annals of Botany* 82 (Supplement A): 3–15.
- Narayan RKJ, Parida A, Vij SP. 1989. DNA variation in Orchidaceae. *Nucleus* 32: 71–75.
- Nishikawa K, Furuta Y, Ishitoba K. 1984. Chromosomal evolution in genus *Carex* as viewed from nuclear DNA content, with special reference to its aneuploidy. *Japanese Journal of Genetics* 59: 465–472.
- NSF. 1990. *Document 90-80. A long range plan for the multinational coordinated Arabidopsis thaliana genome research project*. Washington, DC: National Science Foundation.
- Ohri D, Khoshoo TN. 1986. Plant DNA contents and systematics. In: Dutta SK, ed. *DNA systematics. Vol II. Plants*. Florida: CRC Press, 2–19.
- Ohri D, Fritsch RM, Hanelt P. 1998. Evolution of genome size in *Allium*. *Plant Systematics and Evolution* 210: 57–86.
- Ohri D, Jha SS, Kumar S. 1994. Variability in nuclear DNA content within pigeonpea (*Cajanus cajan* (L.) Millsp.). *Plant Systematics and Evolution* 189: 211–216.
- Ollitrault P, Dambier D, Luro F, Duperray C. 1994. Nuclear genome size variation in *Citrus*. *Fruits* 49: 390–393.
- Palomino G, Sousa SM. 2000. Variation of nuclear DNA content in the biflorous species of *Lonchocarpus* (Leguminosae). *Annals of Botany* 85: 69–76.
- Palomino G, Doležal J, Cid R, Brunner I, Méndez I, Rublío A. 1999. Nuclear genome stability of *Mammillaria san-angelensis* (Cactaceae) regenerants induced by auxins in long-term *in vitro* culture. *Plant Science* 141: 191–200.
- Perkin-Elmer. 1995. *AFLP™ Plant mapping kit Protocol*. (P/N 402083).
- Petrov DA, Sangster TA, Johnson JS, Hartu DL, Shaw KL. 2000. Evidence for DNA loss as a determinant of genome size. *Science* 287: 1060–1062.
- Price HJ, Bachmann K, Chambers KL, Riggs J. 1980. Detection of intraspecific variation in nuclear DNA content in *Microseris douglasii*. *Botanical Gazette* 141: 195–198.
- Rai S, Das AB, Das P. 1997. Estimation of 4C DNA and karyotype analysis in ginger (*Zingiber officinale* Rosc.). *Cytologia* 62: 133–141.
- Ramsay HP. 1983. Cytology of mosses. In: Schuster RM, ed. *New manual of bryology Vol. 1*. Japan: The Hattori Botanical Laboratory Nichinan, Miyuzaki, 149–221.
- Raven JA. 1999. The size of cells and organisms in relation to the evolution of embryophytes. *Plant Biology* 1: 2–12.
- Redondo N, Horjales M, Blanco A. 1999a. Cantidades de DNA nuclear eporas en Asplenaceae: *Asplenium* L. *Phyllitis* Hill y *Ceterach* Willd. *Polypodium* L. *Nova Acta Científica Compostelana (Biología)* 9: 99–107.
- Redondo N, Blanco A, Horjales M. 1999b. Estudio del género *Polypodium* L. del noroeste Ibérico: Cantidades de DNA nuclear. *Nova Acta Científica Compostelana (Biología)* 9: 109–116.
- Rejmanek M. 1996. A theory of seed plant invasiveness: the first sketch. *Biological Conservation* 78: 171–181.
- Renzaglia KS, Rasch EM, Pike LM. 1995. Estimates of nuclear DNA content in bryophyte sperm cells: phylogenetic considerations. *American Journal of Botany* 82: 18–25.

- Reski R, Faust M, Wang Xiao-Ho, Wehe M, Abel WO. 1994.** Genome analysis of the moss *Physcomitrella patens* (Hedw.) B. S. G. *Molecular and General Genetics* **244**: 352–359.
- Riera Lizarazu O, Rines HW, Phillips RL. 1996.** Cytological and molecular characterisation of oat × maize partial hybrids. *Theoretical and Applied Genetics* **93**: 123–135.
- SanMiguel P, Gault BS, Tikhonov A, Nakajima Y, Bennetzen JL. 1998.** The paleontology of intergene retrotransposons of maize. *Nature Genetics* **20**: 43–45.
- Sasaki T. 1998.** The rice genome project in Japan. *Proceedings of the National Academy of Sciences (USA)* **95**: 2027–2028.
- Schifino MT, Winge H. 1983.** Systematics and evolution of the *Briza* complex (Gramineae). 2. Karyotypes and nuclear-DNA content of species of the *Briza* complex and some other genera of Poaceae (Gramineae). *Revista Brasileira de Genética* **6**: 245–259.
- Schofield WB. 1995.** *Introduction to bryology*. London: WH Freeman.
- Sharma AK, Mukhopadhyay S. 1984.** Feulgen microspectrophotometric estimation of nuclear DNA of species and varieties of three different genera of Marantaceae. *Proceedings of the Indian Academy of Science (Plant Science)* **93**: 337–347.
- Soltis DE, Soltis PS. 1999.** Polyploidy: recurrent formation and genome evolution. *Trends in Ecology and Evolution* **14**: 348–352.
- Somerville C, Somerville S. 1999.** Plant functional genomics. *Science* **285**: 380–383.
- Sparrow AH, Miksche JP. 1961.** Correlations of nuclear volume and DNA content with higher plant tolerance to chronic radiation. *Science* **134**: 282–283.
- Strauss NA. 1971.** Comparative DNA renaturation kinetics in amphibians. *Proceedings of the National Academy of Sciences (USA)* **68**: 799–802.
- Sun M, Hu YZ, Chen H. 1999.** Genome size, copy number of Copia-like retrotransposons and phylogenetic relationships of grain amaranths and their wild relatives. *XVI International Botanical Congress, St. Louis, USA, August 1–7, 1999, Poster Abstracts*, No 306, 344.
- Swift H. 1950.** The constancy of desoxyribose nucleic acid in plant nuclei. *Proceedings of the National Academy of Sciences (USA)* **36**: 643–654.
- Tan MK, Thompson JA. 1990.** Variation in genome size in *Pteridium*. In: Thomson JA, Smith RT, eds. *Bracken biology and management*. Occasional Publication 40, Sydney: Australian Institute of Agricultural Science, 87–93.
- Temsch EM, Greilhuber J, Krisai R. 1998.** Genome size in *Sphagnum* (peat moss). *Botanica Acta* **111**: 325–330.
- Temsch EM, Greilhuber J, Voglmayr H, Krisai R. 1999.** Genomegrößen-Bestimmung bei *Sphagnum*: ein Methodenvergleich. In: Zechmeister HG, ed. *Bryologische Forschung in Österreich. Abhandlungen der Zoologisch-Botanischen Gesellschaft in Österreich* **30**: 159–167.
- Tiersch TR, Chandler RW, Wachtel SS, Elias S. 1989.** Reference standards for flow cytometry and application in comparative studies of nuclear DNA content. *Cytometry* **10**: 706–710.
- Underbrink AG, Pond V. 1976.** Cytological factors and their predictive role in comparative radiosensitivity. *Current Topics in Radiation Research Quarterly* **11**: 251–306.
- Valkonen JPT. 1994.** Nuclear DNA content of the *Solanum* spp. in the series *Etuberosa* as determined by laser flow cytometry. *Annals of Applied Biology* **125**: 589–600.
- van Raamsdonk LWD, de Vries T. 1992.** Systematics and phylogeny of *Allium cepa* L. and allies. In: Hanelt P, Hammer K, Knupffer H, eds. *The genus Allium—taxonomic problems and genetic resources. Proceedings of an International Symposium held at Gatersleben, Germany, June 11–13, 1991*, 257–263.
- Vekemans X, Lefévre C, Coulaud J, Blaise S, Gruber W, Šiljak-Yakovlev S, Brown SC. 1996.** Variation in nuclear DNA content at the species level in *Armeria maritima*. *Hereditas* **124**: 237–242.
- Vershinin AV, Heslop-Harrison JS. 1998.** Comparative analysis of the nucleosomal structure of rye, wheat and their relatives. *Plant Molecular Biology* **36**: 149–161.
- Vinogradov AE. 1999.** Intron-genome relationship on a large evolutionary scale. *Journal of Molecular Evolution* **49**: 376–384.
- Vogel KP, Arumuganathan K, Jensen KB. 1999.** Nuclear DNA content of perennial grasses of the Triticeae. *Crop Science* **39**: 661–667.
- Voglmayr H. 2000.** Nuclear DNA amounts in mosses (Musci). *Annals of Botany* **85**: 531–546.
- Voglmayr H, Greilhuber J. 1998.** Genome size determination in Peronosporales (Oomycota) by Feulgen image analysis. *Fungal Genetics and Biology* **25**: 181–195.
- Vosa CG, Bassi P. 1991.** Chromosome [sic.] studies in the Southern African flora. The basic karyotype of eight species of succulent *Euphorbia* L. *Caryologia* **44**: 27–33.
- Voytas DF, Naylor GJP. 1998.** Rapid flux in plant genomes. *Nature Genetics* **20**: 6–7.
- Wendel JF, Schnabel A, Seelanan T. 1995.** Bidirectional interlocus concerted evolution following allopolyploidy speciation in cotton (*Gossypium*). *Proceedings of the National Academy of Sciences (USA)* **92**: 280–284.
- Xia Xh. 1995.** Body-temperature, rate of biosynthesis, and evolution of body size. *Molecular Biology and Evolution* **12**: 834–842.
- Yokoya K, Roberts AV, Mottley J, Lewis R, Brandham PE. 2000.** Nuclear DNA amounts in roses. *Annals of Botany* **85**: 557–562.
- Zoldoš V, Papeš D, Brown SC, Panaud O, Šiljak-Yakovlev S. 1998.** Genome size and base composition of seven *Quercus* species: inter- and intra-population variation. *Genome* **41**: 162–168.
- Zouhair R, Lecocq M. 1998.** Organisation nucléaire et teneur en ADN de plusieurs espèces de cryptogames. *Revue de Cytologie et Biologie Végétale—Le Botaniste* **21**: 15–32.

### Notes to the Appendix

The Appendix appears on pp. 878–906.

Named references in the following notes are given above in ‘Literature cited’, while numbered references are given in ‘Original references for DNA values’ below.

(a) The original references for species DNA amounts in the Appendix are given in a numbered list following the ‘Notes to the Appendix’. Reference numbers follow on sequentially from those given in ‘Notes to Table 8’ by Bennett and Smith (1976; references 1–54), ‘Notes to Table 1’ by Bennett *et al.* (1982; references 55–107) and Bennett and Smith (1991; references 108–163), ‘Notes to the Appendix’ by Bennett and Leitch (1995; references 165–269), and in ‘Notes to the Appendix’ by Bennett and Leitch (1997; references 270–306).

(b1) Bennett and Smith (1991) gave absolute 4C DNA values for 11 angiosperm species recommended for use as calibration standards to estimate DNA amounts in other species. The 11 standard species and their 4C DNA amounts are shown in Table 4. If a species was calibrated in direct comparison with any one or more of the 11 standard species then the standard species used is identified in column 15 of the Appendix by the appropriate Key letter

TABLE 4. *The 11 angiosperm species recommended for use as calibration standards*

| Key | Standard species                          | Amount (pg) |
|-----|-------------------------------------------|-------------|
| A   | <i>Triticum aestivum</i> ‘Chinese Spring’ | 69.27       |
| B   | <i>Allium cepa</i> ‘Ailsa Craig’          | 67.00       |
| C   | <i>Vicia faba</i> PBI, inbred line 6      | 53.31       |
| D   | <i>Anemone virginiana</i> line AV 200     | 35.67       |
| E   | <i>Secale cereale</i> ‘Petkus Spring’     | 33.14       |
| F   | <i>Hordeum vulgare</i> ‘Sultan’           | 22.24       |
| G   | <i>Pisum sativum</i> ‘Minerva Maple’      | 19.46       |
| H   | <i>Zea mays</i> ‘W64A’                    | 10.93       |
| I   | <i>Senecio vulgaris</i> (PBI population)  | 6.33        |
| J   | <i>Vigna radiata</i> ‘Berken’             | 2.12        |
| K   | <i>Oryza sativa</i> ‘IR36’                | 2.02        |

(e.g. F is *Hordeum vulgare*, etc.). If a species was first calibrated using a standard species listed in Table 4, then the original standard species is identified first and the intermediate standard species used to calibrate those species listed with it is also denoted by its number in column 1 of the Appendix. For instance, standard J (*V. radiata*) was used to calibrate *Carex ciliatomarginata* (species 198 in the Appendix) which was then used as an intermediate assumed standard to calibrate other *Carex* species given by Nishikawa *et al.* (1984; Ref. 357). The calibration standard for such *Carex* species is therefore given as J-198.

(b2) In Ref. 338, Keskitalo *et al.* (1998) used *Hordeum vulgare* 'Sultan' as the calibration standard but assumed a 4C DNA value of 21.88 pg (Valkonen, 1994) instead of 22.24 pg which is the value given in Bennett and Smith (1976). The 4C value of *H. vulgare* 'Sultan' used by Keskitalo *et al.* (Ref. 338) was estimated using *Gallus* as the calibration standard with an assumed 4C DNA content of 4.66 pg. Similarly, in Refs 348 (Grauke *et al.*, pers. comm.), 349 (Wendel *et al.*, pers. comm.), and 373 (Bennett *et al.*, pers. comm.) *Pisum sativum* 'Minerva Maple' was used as the calibration standard but with a 4C value of 19.12 pg (Johnston *et al.*, 1999) instead of 19.46 pg, the value given in Bennett and Smith (1976). The 4C value of *P. sativum* 'Minerva Maple' used in Refs 348, 349, and 373 was estimated using *H. vulgare* 'Sultan' as the calibration standard with an assumed 4C DNA content of 22.24 pg.

(c) In several of the references listed in 'Original references for DNA values' the authors used a cultivar of a standard species different from that listed in note (b1) above. Thus for *Allium cepa* the following cultivars were used instead of 'Ailsa Craig': 'Alice' (Ref. 371), 'Wolska' (Ref. 326), 'Deshi' (Refs 324, 334), 'Frühstamm' (Refs 350, 360), 'Kantar Topu' (Ref. 363), 'Stuttgart Riesen' (Ref. 341) and 'Madras Local' (Ref. 364). For *Zea mays*, cultivars 'Va35' and 'CE-777' were used instead of 'W64A' in Refs 311, 344 and 370 respectively. For *Pisum sativum*, the following cultivars were used instead of 'Minerva Maple': 'Express Long' (Ref. 342) and 'Kleine Rheinländerin' (Refs 350, 360, 361). For *Hordeum vulgare*, the cultivar 'Stark' was used in Refs 343, 345, and 368 and the cultivar 'Ditta' was used in Ref. 371 instead of 'Sultan'. For *Vicia faba*, the cultivar 'Aquadulce' was used instead of PBI inbred line 6 in Ref. 310. In Ref. 343, the cultivar 'Arapahoe' of *Triticum aestivum* was used instead of 'Chinese Spring'. In Ref. 329

plants from the Palmerston North population in New Zealand of *Senecio vulgaris* were used instead of the PBI population.

In some cases the C-value of the cultivar used was assumed or estimated to be the same as that of the standard species listed in note (b1). Evidence of intraspecific variation in a number of species suggests that such assumptions may sometimes be incorrect. In other cases the C-value of the cultivar was determined by the authors and was different from that of the standard species listed in (b1). For example Ref. 342 used the cultivar 'Express Long' of *Pisum sativum* with a 4C DNA value of 16.74 pg. This value is lower than the 4C DNA amount of the cultivar 'Minerva Maple' of 19.46 pg. Similarly Refs 350, 360 and 361 used the cultivar 'Kleine Rheinländerin' with a 4C DNA amount of 17.68 pg. Other examples of this include a low assumed value for *Hordeum vulgare* 'Stark' (4C = 21.36 pg used in Refs 343, 345, 368) relative to the 4C DNA amount of 'Sultan' (22.24 pg).

(d) In Ref. 313 (Ceccarelli *et al.*, 1998) the cultivar of *Vicia faba* used as a calibration standard was not given even though the authors assumed the same 4C value as for PBI inbred line 6 (i.e. 53.3 pg). If this species exhibits intraspecific variation then such assumptions may be incorrect. In Ref. 344 (Hopping, 1994) the cultivar of *Hordeum vulgare* used as the calibration standard was not given. Hopping (loc. cit.) estimated the 4C DNA amount for the material to be 20.14 pg.

(e) In a number of original references for DNA values the authors used a plant species not listed in note (b) as a calibration standard. These are listed in Table 5.

(f) Several papers listed in 'Original references for DNA values' used animal cells as the calibration standards. Thus Refs 307, 309, 320, 337, 339, 351, 352, 358, 362, 365, 367 all used chicken erythrocytes with an assumed 4C DNA value of 4.66 pg (Galbraith *et al.*, 1983). The calibration standard is abbreviated to *Gallus* in column 15 of the Appendix. In Ref. 331 blood cells from the catfish *Ictalurus punctatus* were used as a calibration standard with an assumed 4C value of 4.00 pg (Tiersch *et al.*, 1989); this is abbreviated to *Ictal.* in column 15 of the Appendix.

If a species was first calibrated using an animal species, then the original animal species is identified first and the intermediate standard species used to calibrate those species listed with it is denoted by its number in column 1 of the

TABLE 5. Plant species used as a calibration standard but not listed in note (b1)

| Original ref.              | Plant calibration standard used                                        | Assumed 4C DNA amount (pg)             | Abbreviation used in column 15 of Appendix |
|----------------------------|------------------------------------------------------------------------|----------------------------------------|--------------------------------------------|
| 308                        | <i>Medicago sativa</i> ssp. × <i>varia</i> 'Rambler'                   | 6.94 (Blondon <i>et al.</i> , 1994)    | <i>Medic.</i>                              |
| 314, 318, 323,<br>330, 366 | <i>Petunia hybrida</i> 'P × Pc6'                                       | 5.7 (Marie and Brown, 1993)            | <i>Petunia</i>                             |
| 325                        | <i>Petunia hybrida</i> cv. not given<br><i>Lycopersicon esculentum</i> | 5.7 (Marie and Brown, 1993)            | <i>Petunia</i><br><i>Lycopers.</i>         |
| 328, 332                   | 'Stupické polni rané'                                                  | 3.92 (Doležel <i>et al.</i> , 1992)    |                                            |
| 330, 356                   | 'Montfàvet 63/5'                                                       | 4.02 (Marie and Brown, 1993)           |                                            |
| 331                        | 'Rutgers'                                                              | 4.0 (no reference given)               |                                            |
| 360, 361, 369              | <i>Glycine max</i> 'Ceresia'                                           | 4.54 (Greilhuber and Obermayer, 1997)  | <i>Glycine</i>                             |
| 335                        | <i>Citrus limon</i> 'Lisbon'                                           | 1.58 (Ollitrault <i>et al.</i> , 1994) | <i>Citrus</i>                              |

Appendix. For example, in Ref. 352, Bräutigam and Bräutigam (1996) used *Gallus* with an assumed 4C DNA amount of 4.66 pg to calibrate *Hieracium lactucella* (species 388 in the Appendix) which was then used as an internal standard to estimate the DNA C-values of other *Hieracium* species given by Bräutigam and Bräutigam (loc. cit.). The calibration standard for these *Hieracium* species is given as *Gallus*-388. Similarly, Ollitrault *et al.* (1994, Ref. 358) used *Gallus* to estimate the DNA C-value of *Citrus* 'Tahiti Lime' (species 236 in the Appendix) which was then used to estimate the DNA C-values of other *Citrus* species listed in Ref. 358. The calibration standard for these *Citrus* species is given as *Gallus*-236.

(g) When a new estimate (or estimates) is given for a species or subspecies already listed by Bennett and Smith (1976, 1991), Bennett *et al.* (1982) or Bennett and Leitch (1995, 1997) the estimate is given a number and a lower case letter in column 1 of the Appendix. An 'a' implies that the value is preferred to any estimate for that species listed previously by the first author. Where several estimates are available for the same species, the 'a' value would be automatically chosen to represent the species in any arithmetical or statistical calculations. In this context, single estimates for species and 'a' values are referred to as 'prime entries'.

(h) Intraspecific variation in nuclear DNA amount is claimed to occur in this species. Consequently the values given in the Appendix should not be assumed to be correct for all accessions of the species. Where several DNA C-values are listed for a single species with the same ploidy level, or chromosome number, within a taxon then only the minimum and maximum values reported from a single reference are listed in the Appendix (e.g. *Coffea* species listed in Ref. 309 by Cros *et al.*, 1994).

(i) A range of nuclear DNA amounts was reported for this species in the reference cited in column 13 of the Appendix. Intraspecific variation was not claimed to occur, so the nature of this variation is unclear. Where the estimates differed by more than 10% the minimum and maximum values are given for the same ploidy level or chromosome number in the Appendix, otherwise only the highest value is given.

(j) According to the International Code of Botanical Nomenclature (Greuter *et al.*, 1994) the names of plant families must end in -aceae. However, eight plant families are exceptions in that each has two alternative names, both of which are correct under the Botanical Code. One is a standard name, ending in -aceae, the other is an exception, sanctioned by long usage. These and their alternatives are the following: Palmae (Arecaceae), Gramineae (Poaceae), Cruciferae (Brassicaceae), Leguminosae (Fabaceae), Guttiferae (Clusiaceae), Umbelliferae (Apiaceae), Labiatae (Lamiaceae) and Compositae (Asteraceae). To be consistent with previous DNA lists (Bennett and Smith, 1976, 1991; Bennett *et al.*, 1982; Bennett and Leitch, 1995, 1997) the 'non-standard' plant names are retained in the present work.

(k) Recent cladistic analysis using both molecular and non-molecular phylogenetic data has resulted in a revised classification of 464 flowering plant families [Angiosperm

Phylogeny Group (APG), 1998]. The familial names used in the APG classification are followed in the Appendix of this paper. Thus, although Bukhari (1997, Ref. 320) placed the genera *Acacia* and *Prosopis* in Mimosaceae, recent molecular and non-molecular phylogenetic data recognize that this family (although monophyletic) is embedded within the Leguminosae (APG, 1998) so Leguminosae is given as the family in the Appendix. This also agrees with previous DNA C-value lists (i.e. Bennett and Leitch, 1995, 1997) where both *Acacia* and *Prosopis* were listed under Leguminosae. Similarly, the APG (1998) now recognizes that Chenopodiaceae is embedded within the Amaranthaceae, so *Chenopodium album* which was placed in Chenopodiaceae in Ref. 375 (Bennett *et al.*, 1998) is listed under Amaranthaceae in the Appendix.

(l) The authority for this species is either unknown or unclear to the present authors.

(m) Whether or not voucher specimens exist for this species is unknown to the present authors.

(n) The chromosome number of this species is either unknown or unclear to the present authors.

(o) The chromosome count for this species was taken from the literature and not determined by the authors of the reference cited.

(p) The ploidy level of this species is either uncertain or unclear to the present authors.

(q) The life cycle type of this species is either unknown or unclear to the present authors.

(r) The method used to measure the DNA amount is unclear.

(s) DNA amounts are often given in picograms (pg) or megabase pairs (Mbp). Hitherto, collected lists of DNA amounts by Bennett and co-authors gave DNA amounts only in picograms, noting a conversion factor from Strauss (1971) of 1 pg = 965 Mbp. The Appendix of the present work gives a range of C-values in picograms for each taxon as before, except that the 3C value is omitted here as this value is rarely used today. (3C values are easily obtained from the data given, but to minimize rounding errors they should be calculated as 0.75 of the 4C value, rather than three times the 1C value.)

The present work also gives 1C values in Mbp for the first time (see column 9 of the Appendix). Please note that the factor used to convert picograms to Mbp differs from that given previously. Thus, a value of 1 pg = 980 Mbp (Cavalier-Smith, 1985) was used, rather than that from Strauss (1971) mentioned above.

When converting picogram values to base pairs it is often permissible to use the rough approximation 1 pg  $\approx$  1 million base pairs  $\approx$  1000 Mbp. The conversion factor used in the present work (1 pg = 980 Mbp) is more accurate, but it is also an approximation. Different factors for converting picograms and daltons may reflect authors using different approximations for the atomic weights of elements in DNA (i.e. 1 or 1.00797 for hydrogen), or assuming different states of the DNA molecule (i.e. dissociated or non-dissociated). Assuming the following atomic weights (H = 1.00797; C = 12.0115; N = 14.0067; O = 15.9994; and P = 30.9738), 1 dalton =  $1.65979 \times 10^{-24}$  g), and an AT:GC base ratio of 1:1, then a more accurate factor for



converting pg to Mbp is  $1 \text{ pg} = 978.3 \text{ Mbp}$  for dissociated DNA and  $975.0 \text{ Mbp}$  for non-dissociated DNA. The molecular weights of the nucleotide pairs are, for A-T, 615.39361 and 617.40955 in dissociated and non-dissociated DNA, respectively, and for C-G 616.38119 and 618.39713 in dissociated and non-dissociated DNA, respectively. The AT:GC base ratios vary between taxa, e.g. the % GC ranges from 38.0 to 45.4% in angiosperms (Marie and Brown, 1993). As noted above the molecular weights of the nucleotide pairs A-T and G-C differ slightly (by about 0.15%). Thus, small additional errors are caused by variation in AT:GC ratios of the nuclear DNA among different taxa. While the values for A-T and C-G differ slightly, the difference is insufficient to require a different conversion factor for transforming pg to Mbp in taxa with different DNA base pair ratios. The resulting error (no more than 0.15%) is similar to the accepted error of 0.5% caused by the approximation which rounds  $1 \text{ pg} = 975 \text{ Mbp}$  to  $1 \text{ pg} = 980 \text{ Mbp}$  for non-dissociated DNA.

(t) In Refs 307, 332, 351, 363, 366 and 370, 1C DNA values are given in Mbp calculated from DNA estimates expressed in picograms using a factor other than  $1 \text{ pg} = 980 \text{ Mbp}$ . Refs 307, 332, 351 and 370 used a conversion factor of  $1 \text{ pg} = 965 \text{ Mbp}$ , whereas Ref. 363 used  $1 \text{ pg} = 912 \text{ Mbp}$ . For each of these original references, the 1C DNA values in Mbp were re-calculated using the factor  $1 \text{ pg} = 980 \text{ Mbp}$  [see note (s)] before listing in column 9 of the Appendix.

(u) There is no obvious basic number for the genus *Carex* due to the presence of holocentric chromosomes, it is therefore impossible to allocate *Carex* species with high chromosome numbers to any ploidy level with certainty.

(v) In several original references the DNA C-value of a taxon to be used as an internal standard was determined from a regression of nuclear fluorescence vs. nuclear DNA content for a few calibration standards whose DNA C-values were already known. For example, Morgan *et al.* (1995, Ref. 315) and Morgan *et al.* (1998, Ref. 316) obtained the regression from *Zea mays* inbred line Va35, *Hordeum vulgare* 'Sultan' and *Triticum aestivum* 'Chinese Spring' with assumed 4C DNA values of 10.30, 21.88 and 69.26 pg, respectively (but note that all of these 4C DNA amounts are non-standard values compared with 4C values given for these species in note (b1) above). Morgan *et al.* (1995, Ref. 315) used this regression to determine the nuclear DNA content of *Avena sativa* 'Awapuni' ( $4C = 50.10 \text{ pg}$ ) which was added to *Limonium* extractions to serve as an internal standard. The calibration standard was abbreviated to *Avena* in column 15 of the Appendix. Morgan *et al.* (1998, Ref. 316) also used this regression to determine the DNA content of *Secale cereale* 'Rahu' ( $4C = 31.78 \text{ pg}$ ) which was added to *Limonium* extractions as an internal standard. Yokoya *et al.* (1999, Ref. 346) used a similar approach to obtain their regression from *Vigna radiata* 'Berken' ( $4C = 2.12 \text{ pg}$ ), *Lycopersicon esculentum* 'Stupické polni rané' ( $4C = 3.92 \text{ pg}$ ), *Glycine max* 'Polanka' ( $4C = 5.00 \text{ pg}$ ) and *Hordeum vulgare* 'Sultan' ( $4C = 22.24 \text{ pg}$ ). They used this regression to determine the DNA content of *Petroselinum crispum* 'Champion Moss

Curled' ( $4C = 8.92 \text{ pg}$ ) which was added to many *Rosa* samples studied by flow cytometry as an internal standard. This calibration standard was abbreviated to *Petrosel.* in column 15 of the Appendix.

(w) The standard species used to convert arbitrary units into absolute DNA amounts is unclear to the present authors.

(x) The DNA value given for this species in the original reference differs considerably (i.e. > 100%) from that given in other original references cited in previous compiled lists of DNA amounts (i.e. Bennett and Smith, 1976, 1991; Bennett *et al.*, 1982; Bennett and Leitch, 1995, 1997). The reason(s) for this is unknown. Thus this C-value should be used with caution until the question is resolved.

(y) The specific status of the material available for study is unclear. The data are included since information on DNA amounts for this genus is relatively sparse so an indication of genome size in the genus may be useful.

(z) Jones *et al.* (1998, Ref. 307) and Jones and Kuehnle (1998, Ref. 362) estimated the 4C DNA amount of *Dendrobium moschatum* as 7.0 pg. This value differs considerably from the 4C value of 18.6 pg obtained by Narayan *et al.* (1989). The discrepancy was noted by Jones *et al.* (1998) who stated 'The reason for this is unknown but could arise from differences between varieties or between methods of DNA content analysis'.

(aa) Cremonini *et al.* (1994, Ref. 310) studied C-values in *Dasypyrum villosum* (syn. *Haynaldia villosa*) and reported 4C amounts of 23.7 and 19.1 pg for yellow and brown caryopses respectively. They used *Vicia faba* as the calibration standard, but did not state the assumed 4C DNA amount. Cremonini *et al.* (loc. cit.) stated that their values contradicted a previous report by Bennett (1972). However, the 3C value (19.6 pg) given by Bennett (1972) was later corrected and a recalibrated value ( $4C = 21.4 \text{ pg}$ ) was given by Bennett and Smith (1976) using *Hordeum vulgare* 'Sultan' ( $4C \text{ DNA amount} = 22.24 \text{ pg}$ ) as the calibration standard. Contrary to Cremonini *et al.* (1994) the most recent 4C estimate for *Dasypyrum villosum* given by Bennett and Smith (1976) does not contradict their results, but is within their range of reported values (19.1–23.7 pg) and identical with their mean of 21.4 pg.

(ab) In Ref. 311 (Lindsay *et al.*, 1994), the DNA amount was estimated in *Eustoma grandiflorum* 'Hakusen' using flow cytometry. Although no chromosome counts were made it was assumed that the DNA content from the flow cytometric histograms corresponded to the 2C value. Only if this assumption is correct is the C-value valid.

(ac) Horjales *et al.* (1995, Ref. 314) checked the chromosome number ( $2n = 42$ ) cytologically in their hexaploid plants. However, their claim that DNA measurements made by flow cytometry, without such counts, offer a reliable method to detect ploidy level/chromosome number routinely (see their English abstract) in these materials may be premature. The 2C DNA amounts for diploid and tetraploid *Dactylis glomerata* estimated by flow cytometry in Horjales *et al.* (1995) are about half as large as those reported for this taxon by several previous authors using Feulgen microdensitometry (Table 6).

TABLE 6. 2C DNA amounts for diploid and polyploid *Dactylis glomerata*

| Original ref.                       | 2n | 2C DNA amount (pg) | Method  |
|-------------------------------------|----|--------------------|---------|
| 1 (Bennett, 1972)                   | 14 | 9.8                | Fe      |
| 154 (Band, pers. comm., 1984)       | 14 | 8.7                | Fe      |
| 275 (Creber <i>et al.</i> , 1994)   | 14 | 6.6                | Fe      |
| 314 (Horjales <i>et al.</i> , 1995) | 14 | 3.5                | FC:DAPI |
| 117 (Schifino and Winge, 1983)      | 28 | 12.4               | Fe      |
| 275 (Creber <i>et al.</i> , 1994)   | 28 | 11.2               | Fe      |
| 371 (Greilhuber and Baranyi, 1999)  | 28 | 8.3                | Fe      |
| 371 (Greilhuber and Baranyi, 1999)  | 28 | 8.2                | FC:PI   |
| 314 (Horjales <i>et al.</i> , 1995) | 28 | 6.4                | FC:DAPI |
| 314 (Horjales <i>et al.</i> , 1995) | 42 | 8.8                | FC:DAPI |

The reason(s) for this divergence is uncertain. Schifino and Winge (1983) expressed reservations about the reliability of their measurements including those for *D. glomerata* (see footnote 'o' in Bennett and Smith, 1991) while Creber *et al.* (1994) claimed considerable intraspecific variation in C-values in this species estimated by Feulgen microdensitometry. However, Creber *et al.* (loc. cit.) also reported that *D. glomerata* needed a considerably longer hydrolysis time (62 min at 25°C with 5 M HCl) than the standard species *Hordeum vulgare* (20 min in otherwise the same conditions), an observation that Greilhuber and Baranyi (1999) could not reproduce. These observations suggest that C-value estimates for *D. glomerata* taxa should be treated with caution until the nature and extent of the variation is determined.

(ad) The genus *Prospero* Salisb. was first used to describe a natural group of species formerly in the genus *Scilla* L. sharing the synapomorphy of a certain micropyle type not found in other related taxa (Ebert, 1993). The species included in this genus were *P. autumnalis* (= *Scilla autumnalis*) and *P. obtusifolia* (= *Scilla obtusifolia*), although given the considerable morphological and chromosomal variation described in the genus, other species have since been described (e.g. see Ebert *et al.*, 1996, Ref. 321). Given the variation encountered and the taxonomic uncertainties surrounding the delimitation of the species in the genus *Prospero*, Ebert *et al.* (loc. cit.) used the name *P. autumnalis* s.l. to describe the material of *P. autumnalis* rather than *P. autumnalis* (L.) Speta, which they considered to belong to the widely-distributed tetraploid which occurs in Italy and parts of France.

Genome size data for 15 accessions of *P. autumnalis* s.l. with either 2n = 12 or 2n = 14 were reported. Significant differences in C-values between populations were found. Consequently only the lowest and highest DNA amounts for each chromosome number are given in the Appendix.

(ae) Hopkins *et al.* (1996, Ref. 331) estimated nuclear DNA contents in 34 different populations of switchgrass (*Panicum virgatum*) with ploidy levels of 4, 6 or 8x. In the Appendix only the largest and smallest DNA amounts are given for each ploidy level. The mean 4C nuclear DNA

contents for verified tetraploid and octoploid populations were estimated to be 6.2 and 10.4 pg, respectively.

(af) In Ref. 332, Ayele *et al.* (1996) stated 'To our knowledge, the genomic size of *Eragrostis tef* has not been reported'. They were the first to use flow cytometry for this purpose, but they did not make the first estimate for this species. Their 4C nuclear DNA contents of 2.96–3.02 pg for four cultivars are similar to the 4C value of 2.70 pg given by Bennett and Smith (1976). Surprisingly, Ayele *et al.* (loc. cit.) seemed unaware of this earlier estimate, yet they cited Bennett and Smith (1976) for a different reason when listing their DNA values for the Ethiopian cereal, tef, in their Table 1.

(ag) The range of C-values (4C = 37.0–57.4 pg) given for eight species of *Euphorbia* by Vosa and Bassi (1991, Ref. 333) differ considerably (i.e. sometimes more than ten-fold) from two estimates of *Euphorbia pulcherrima* by Galbraith *et al.* (1983: 4C = 5.2 pg estimated by flow cytometry using mithromycin), and Bennett *et al.* (Ref. 373 in this paper: 4C = 6.6 pg estimated by flow cytometry using propidium iodide). Vosa and Bassi (loc. cit.) did not estimate a C-value for *E. pulcherrima* nor did they comment on the large difference between their values for *Euphorbia* taxa and that of Galbraith *et al.* (1983). While up to nine-fold variation in C-values has been reported within a genus (e.g. *Crepis*; Jones and Brown, 1976) it is uncommon and so further work is needed to confirm that such large differences in C-values within the genus *Euphorbia* are real.

(ah) The range of C-values (4C = 18.4–27.8 pg) for seven species of Cactaceae in the genus *Mammillaria* given by Das *et al.* (1997, Ref. 334) is more than two-fold greater than three other estimates for *Mammillaria* species by Barlow (pers. comm., cited in Bennett and Smith, 1976; *M. bocasana* 4C = 8.2 pg and *M. woodsii* 4C = 6.2 pg estimated by Feulgen microdensitometry), and Palomino *et al.* (1999, Ref. 328 in this paper: *M. san-angelensis* 4C = 6.4 pg estimated by flow cytometry using propidium iodide). In particular, the 4C estimate of *M. bocasana* given by Das *et al.* (loc. cit.) of 19.5 pg was 2.4-fold greater than the value reported by Barlow (loc. cit.) for the same species (4C = 8.2 pg). The values in Ref. 334 also fall outside the range of C-values reported for eight other diploid species of Cactaceae (4C = 4.1–7.8 pg) given by Barlow (loc. cit.) and De Rocher *et al.* (1990). The reason(s) for this discrepancy is unknown, thus the C-value estimates of Ref. 334 should be viewed with caution until the question is resolved.

(ai) Ref. 336 (Baranyi and Greilhuber, 1999) estimated the C-values of 57 accessions or cultivars of 28 different *Allium* species. Variation in DNA content of 1.08-fold or less was reported for all species except *A. carinatum* where C-values for different accessions varied by 1.10-fold. The authors suggested that a real difference in DNA amount existed between diploid *A. carinatum* accessions. The C-value variation reported for the 27 other species was not statistically significant and Baranyi and Greilhuber (loc. cit.) proposed that the data 'give an indication of the variation in measurement values that is to be expected between investigators working with the same material, technique and instrumentation at a given sample size'. Consequently the mean DNA C-values are given in the

Appendix for all species except diploid *A. carinatum* where the highest and lowest values are listed.

(aj) Baranyi and Greilhuber (1999, Ref. 336) estimated the 4C DNA amount of *Allium cepa* var. *viviparum* to be 57.5 pg. This estimate is very similar to the 4C value of 59.8 pg for the F<sub>1</sub> hybrid *A. cepa* × *A. fistulosum* reported by Evans *et al.* (1972). Both values differ considerably from other reported 4C values of *A. cepa* which range from 65.4–69.5 pg [listed in Bennett and Smith (1976) and Bennett and Leitch (1995, 1997)]. The similarity in DNA values between *A. cepa* var. *viviparum* and *A. cepa* × *A. fistulosum* support the theory that the former is an ancient hybrid of the latter (van Raamsdonk and de Vries, 1992), and the considerable difference in C-value between *A. cepa* var. *viviparum* and the other *A. cepa* estimates suggest that this variety is more taxonomically distinct from *A. cepa* than is currently recognized by its nomenclature. Further work is needed to investigate this.

(ak) Valkonen (1994, Ref. 337) estimated the C-values of three species of *Solanum* from Section *Etuberosa* under two different temperature regimes [18°C and 25/22°C (day/night)]. He found that *S. fernandezianum* grew vigorously and produced flowers at 18°C whereas growth was poor at 25/22°C. In contrast, *S. brevidens* and *S. etuberosum* grew well at 25/22°C but poorly at 18°C with the plants remaining stunted. These results were shown to reflect the different natural habitats of the species. DNA C-values were estimated at each temperature. For *S. brevidens* and *S. etuberosum*, a small decrease in DNA amount was reported at 18°C compared with 25/22°C. In contrast, DNA amount increased in *S. fernandezianum* grown at 18°C compared with 25/22°C. To reflect the different temperature requirements of the three species the highest DNA amounts recorded for *S. brevidens* and *S. etuberosum* grown at 25/22°C are given in the Appendix whereas for *S. fernandezianum* the DNA amount for plants grown at 18°C is listed.

(al) In Ref. 343, Vogel *et al.* (1999) used the genomically-based nomenclature system of Dewey (1984) and Barkworth and Dewey (1985). In these two papers, tables are presented showing the genomically-based nomenclature together with common synonyms and traditional nomenclature. To check for synonyms in previously published lists of DNA C-values (i.e. Bennett and Smith, 1976, 1991; Bennett *et al.*, 1982; Bennett and Leitch, 1995, 1997), a species name listed by Vogel *et al.* (loc. cit.) was located in the genomically-based nomenclature list of Dewey (1984) or Barkworth and Dewey (1985) and then the common synonyms given were checked against previously published DNA lists. For example, *Thinopyrum elongatum*, listed by Vogel *et al.* (loc. cit.), has the common synonym *Agropyron elongatum* (Dewey, 1984) which was listed by Bennett and Smith (1976). Synonyms could not be checked for 15 species given in Vogel *et al.* (loc. cit.) because they were not listed by Dewey (1984) or Barkworth and Dewey (1985).

(am) Lu *et al.* (1998, Ref. 345) reported DNA C-values for two tetraploid and four octoploid populations of switchgrass (*Panicum virgatum*) which were cytologically analysed. Since the DNA C-values given for each ploidy level differed by less than 10% and intraspecific variation

was not reported, only the mean DNA amount for the two ploidy levels is given in the Appendix. The mean 4C DNA amount for the two tetraploid populations of 6.2 pg agreed well with values in Ref. 331 by Hopkins *et al.* (1996; 4C = 4.3–6.6 pg, 20 populations analysed).

However, Lu *et al.* (1998) reported that their results for four octoploid populations (mean 4C = 12.26 pg, range = 12.12–12.44 pg) were higher than those of Hopkins *et al.* (loc. cit.; mean 4C = 10.20 pg, range 9.40–12.00 pg) who analysed 12 octoploid populations. Lu *et al.* suggested that technical differences accounted for the discrepancy. For example, different calibration standards were used. Hopkins *et al.* used catfish (*Ictalurus punctatus*) blood cells and tomato (*Lycopersicon esculentum*), both with an assumed 4C value of 4.0 pg, whereas Lu *et al.* used barley (*Hordeum vulgare* 'Stark') with an assumed 4C value of 21.36 pg. Interestingly, Lu *et al.* (1998) also reported that the mean 4C DNA content of 100 plants from each of three different octoploid cultivars estimated by flow cytometry but not analysed cytogenetically, were 11.80, 11.84 and 12.00 pg. These values do overlap with the data from Hopkins *et al.* (1996) but this was not noted by Lu *et al.* (1998).

(an) Bräutigam and Bräutigam (1996, Ref. 352) gave DNA amounts for nine *Hieracium* species in arbitrary units relative to *H. lactucella* that was used as an internal standard. Following correspondence with the authors, the absolute 4C DNA amount of *H. lactucella* was determined as 3.65 pg using *Gallus* as a calibration standard with an assumed 2C DNA amount of 2.33 pg. It was therefore possible to convert the relative DNA values for the remaining *Hieracium* taxa into absolute amounts by multiplying the peak ratio value given in column 3 of Table 2 in Ref. 352 by 3.65. The absolute DNA amounts are given in the Appendix. Although the relative DNA value for *H. stoloniflorum* was given in Ref. 352, its absolute DNA amount was omitted from the Appendix following the authors' request.

The DNA amounts for *Hieracium* species listed by Bräutigam and Bräutigam (loc. cit.) included two species measured previously (i) *H. piloselloides*, 4C = 4.3 pg, estimated by Bachmann, Price and Bierweiler and listed in Bennett and Smith (1976), and (ii) *H. pilosella*, 4C = 17.0 pg, estimated by Band and listed in Bennett and Smith (1991). These values differ from those given in Ref. 352 of 4C = 14.7 and 12.6 pg respectively but the discrepancies were not noted so the reason(s) is unknown.

(ao) 4C DNA amounts for several Marantaceae taxa given in Table 1 of Sharma and Mukhopadhyay (1984, Ref. 355) in arbitrary units (a.u.) were converted to absolute amounts using the conversion fraction 1 pg = 12 a.u. This factor was obtained as the mean ratio of the estimates for *Maranta bicolor* (0.1734 a.u.) and *Stromanthe sanguinea* (0.2254 a.u.) obtained by Sharma and Mukhopadhyay (1984) and by L. Hanson at RBG, Kew (4C = 2.09 pg and 2.68 pg, respectively). Root-tips of *Maranta bicolor* and *Stromanthe sanguinea* were taken from plants at RBG, Kew in 1999, and their 4C DNA amounts estimated by Feulgen microdensitometry as 2.09 pg and 2.68 pg, respectively, using *Vigna radiata* 'Berken' (4C = 2.12 pg) as a calibration

APPENDIX. Chromosome number, ploidy level, life-cycle type, and nuclear DNA content in 807 angiosperm species (the superscript letters refer to notes concerning this table)

| Entry number <sup>s</sup> | Species                                          | Voucher | Family                   | Monocot or dicot | Ploidy level (x) | Life cycle type <sup>§</sup> | DNA amount             |         |         |         | Original ref. <sup>a</sup> | Present amount <sup>b</sup> | Standard species <sup>*b1</sup> | Method <sup>†</sup>        |       |
|---------------------------|--------------------------------------------------|---------|--------------------------|------------------|------------------|------------------------------|------------------------|---------|---------|---------|----------------------------|-----------------------------|---------------------------------|----------------------------|-------|
|                           |                                                  |         |                          |                  |                  |                              | 1C (Mbp <sup>s</sup> ) | 1C (pg) | 2C (pg) | 4C (pg) |                            |                             |                                 |                            |       |
| 1                         | <i>Abelmoschus esculentus</i> (L.) Moench        | No      | Malvaceae                | D                | 120              | — <sup>p</sup>               | A                      | 1,666   | 1.7     | 3.3     | 6.6                        | 373                         | O                               | G <sup>b2</sup>            | FC:PI |
| 2                         | <i>Abutilon theophrasti</i> Medik.               | Yes     | Malvaceae                | D                | 42               | 6                            | A                      | 1,372   | 1.4     | 2.8     | 5.6                        | 375                         | O                               | F                          | Fe    |
| 3                         | <i>Acacia albidia</i> (Del.) <sup>y</sup>        | No      | Leguminosae <sup>k</sup> | D                | 26               | 2                            | P                      | 588     | 0.6     | 1.2     | 2.3                        | 320                         | O                               | <i>Gallus</i> <sup>f</sup> | FC:PI |
| 4                         | <i>Acacia aulacocarpa</i> A.Cunn. ex Benth.      | No      | Leguminosae              | D                | 26               | 2                            | P                      | 1,470   | 1.5     | 3.0     | 6.0                        | 364                         | O                               | B <sup>c</sup>             | Fe    |
| 5                         | <i>Acacia auriculaeformis</i> A.Cunn. ex Benth.  | No      | Leguminosae              | D                | 26               | 2                            | P                      | 1,078   | 1.1     | 2.2     | 4.4                        | 364                         | O                               | B <sup>c</sup>             | Fe    |
| 6                         | <i>Acacia bancroftii</i> Maiden                  | No      | Leguminosae              | D                | 26               | 2                            | P                      | 1,470   | 1.5     | 2.9     | 5.8                        | 364                         | O                               | B <sup>c</sup>             | Fe    |
| 7                         | <i>Acacia caffra</i> (Thunb.) Willd.             | No      | Leguminosae <sup>k</sup> | D                | 26               | 2                            | P                      | 588     | 0.6     | 1.1     | 2.2                        | 320                         | O                               | <i>Gallus</i> <sup>f</sup> | FC:PI |
| 8                         | <i>Acacia cincinnata</i> F.Muell.                | No      | Leguminosae              | D                | 26               | 2                            | P                      | 1,862   | 1.9     | 3.9     | 7.7                        | 364                         | O                               | B <sup>c</sup>             | Fe    |
| 9                         | <i>Acacia concurrens</i> Pedley                  | No      | Leguminosae              | D                | 26               | 2                            | P                      | 1,470   | 1.5     | 3.1     | 6.1                        | 364                         | O                               | B <sup>c</sup>             | Fe    |
| 10                        | <i>Acacia crassa</i> Pedley                      | No      | Leguminosae              | D                | 26               | 2                            | P                      | 1,470   | 1.5     | 2.9     | 5.8                        | 364                         | O                               | B <sup>c</sup>             | Fe    |
| 11                        | <i>Acacia crassicaarpa</i> A.Cunn. ex Benth.     | No      | Leguminosae              | D                | 26               | 2                            | P                      | 1,372   | 1.4     | 2.7     | 5.5                        | 364                         | O                               | B <sup>c</sup>             | Fe    |
| 12b                       | <i>Acacia dealbata</i> Link var. <i>dealbata</i> | No      | Leguminosae <sup>k</sup> | D                | 26               | 2                            | P                      | 784     | 0.8     | 1.6     | 3.1                        | 320                         | O                               | <i>Gallus</i> <sup>f</sup> | FC:PI |
| 13                        | <i>Acacia drepanolobium</i> Harm. ex Sios.       | No      | Leguminosae <sup>k</sup> | D                | 52               | 4                            | P                      | 588     | 0.6     | 1.1     | 2.3                        | 320                         | O                               | <i>Gallus</i> <sup>f</sup> | FC:PI |
| 14                        | <i>Acacia falcata</i> <sup>1</sup>               | No      | Leguminosae              | D                | 26               | 2                            | P                      | 1,470   | 1.5     | 3.0     | 6.0                        | 364                         | O                               | B <sup>c</sup>             | Fe    |
| 15                        | <i>Acacia falciformis</i> DC.                    | No      | Leguminosae              | D                | 26               | 2                            | P                      | 1,176   | 1.2     | 2.3     | 4.7                        | 364                         | O                               | B <sup>c</sup>             | Fe    |
| 16b                       | <i>Acacia farnesiana</i> Willd.                  | No      | Leguminosae              | D                | 52               | 4                            | P                      | 1,470   | 1.5     | 3.1     | 6.1                        | 364                         | O                               | B <sup>c</sup>             | Fe    |
| 17                        | <i>Acacia fimbriata</i> A.Cunn. ex G.Don         | No      | Leguminosae              | D                | 26               | 2                            | P                      | 1,764   | 1.8     | 3.6     | 7.2                        | 364                         | O                               | B <sup>c</sup>             | Fe    |
| 18a                       | <i>Acacia holosericea</i> A.Cunn. ex G.Don       | No      | Leguminosae              | D                | 52               | 4                            | P                      | 1,666   | 1.7     | 3.5     | 7.0                        | 364                         | O                               | B <sup>c</sup>             | Fe    |
| 18b                       | <i>Acacia holosericea</i> A.Cunn. ex G.Don.      | No      | Leguminosae <sup>k</sup> | D                | 52               | 4                            | P                      | 1,666   | 1.7     | 3.3     | 6.6                        | 320                         | O                               | <i>Gallus</i> <sup>f</sup> | FC:PI |
| 19                        | <i>Acacia hylonoma</i> L. Pedley                 | No      | Leguminosae              | D                | 26               | 2                            | P                      | 1,372   | 1.4     | 2.8     | 5.6                        | 364                         | O                               | B <sup>c</sup>             | Fe    |
| 20                        | <i>Acacia implexa</i> Benth.                     | No      | Leguminosae <sup>k</sup> | D                | 26               | 2                            | P                      | 784     | 0.8     | 1.6     | 3.2                        | 320                         | O                               | <i>Gallus</i> <sup>f</sup> | FC:PI |
| 21                        | <i>Acacia irrorata</i> Sieber                    | No      | Leguminosae              | D                | 26               | 2                            | P                      | 1,764   | 1.8     | 3.6     | 7.1                        | 364                         | O                               | B <sup>c</sup>             | Fe    |
| 22                        | <i>Acacia iteaphylla</i> F.Muell. ex Benth.      | No      | Leguminosae              | D                | 26               | 2                            | P                      | 1,862   | 1.9     | 3.8     | 7.7                        | 364                         | O                               | B <sup>c</sup>             | Fe    |
| 23                        | <i>Acacia leiocalyx</i> (Domin) Pedley           | No      | Leguminosae              | D                | 26               | 2                            | P                      | 1,568   | 1.6     | 3.2     | 6.3                        | 364                         | O                               | B <sup>c</sup>             | Fe    |
| 24                        | <i>Acacia leptocarpa</i> A.Cunn. ex Benth.       | No      | Leguminosae              | D                | 26               | 2                            | P                      | 1,176   | 1.2     | 2.4     | 4.9                        | 364                         | O                               | B <sup>c</sup>             | Fe    |
| 25                        | <i>Acacia longispicata</i> Benth.                | No      | Leguminosae              | D                | 26               | 2                            | P                      | 1,862   | 1.9     | 3.8     | 7.5                        | 364                         | O                               | B <sup>c</sup>             | Fe    |

|     |                                                                               |     |                          |   |     |   |   |       |     |     |      |     |   |                     |       |
|-----|-------------------------------------------------------------------------------|-----|--------------------------|---|-----|---|---|-------|-----|-----|------|-----|---|---------------------|-------|
| 26  | <i>Acacia maidenii</i> F. Muell.                                              | No  | Leguminosae              | D | 26  | 2 | P | 1,470 | 1.5 | 2.9 | 5.8  | 364 | O | B <sup>c</sup>      | Fe    |
| 27  | <i>Acacia mangium</i> Willd.                                                  | No  | Leguminosae              | D | 26  | 2 | P | 1,078 | 1.1 | 2.3 | 4.6  | 364 | O | B <sup>c</sup>      | Fe    |
| 28  | <i>Acacia mearnsii</i> Willd.                                                 | No  | Leguminosae <sup>k</sup> | D | 26  | 2 | P | 686   | 0.7 | 1.4 | 2.8  | 320 | O | Gallus <sup>f</sup> | FC:PI |
| 29b | <i>Acacia melanoxylon</i> Roxb.                                               | No  | Leguminosae <sup>k</sup> | D | 26  | 2 | P | 686   | 0.7 | 1.5 | 3.0  | 320 | O | Gallus <sup>f</sup> | FC:PI |
| 30  | <i>Acacia mellifera</i> (Vahl) Benth. <sup>i</sup>                            | No  | Leguminosae <sup>k</sup> | D | 26  | 2 | P | 588   | 0.6 | 1.2 | 2.4  | 320 | O | Gallus <sup>f</sup> | FC:PI |
| 31a | <i>Acacia nilotica</i> (L.) Willd. ex Del.<br>var. <i>indica</i> <sup>i</sup> | No  | Leguminosae <sup>k</sup> | D | 52  | 4 | P | 490   | 0.5 | 1.1 | 2.2  | 320 | O | Gallus <sup>f</sup> | FC:PI |
| 31b | <i>Acacia nilotica</i> (L.) Willd. ex Del.<br>var. <i>nilotica</i>            | No  | Leguminosae <sup>k</sup> | D | 52  | 4 | P | 588   | 0.6 | 1.1 | 2.2  | 320 | O | Gallus <sup>f</sup> | FC:PI |
| 31c | <i>Acacia nilotica</i> (L.) Willd. ex Del.<br>var. <i>tomentosa</i>           | No  | Leguminosae <sup>k</sup> | D | 52  | 4 | P | 588   | 0.6 | 1.1 | 2.2  | 320 | O | Gallus <sup>f</sup> | FC:PI |
| 32  | <i>Acacia nilotica</i> (L.) Willd. ex Del.<br>var. <i>adstringens</i>         | No  | Leguminosae <sup>k</sup> | D | 104 | 8 | P | 1,078 | 1.1 | 2.2 | 4.4  | 320 | O | Gallus <sup>f</sup> | FC:PI |
| 33  | <i>Acacia nubica</i> Benth. <sup>i</sup>                                      | No  | Leguminosae <sup>k</sup> | D | 56  | 4 | P | 882   | 0.9 | 1.7 | 3.4  | 320 | O | Gallus <sup>f</sup> | FC:PI |
| 34  | <i>Acacia orites</i> Pedley                                                   | No  | Leguminosae              | D | 26  | 2 | P | 1,470 | 1.5 | 2.9 | 5.8  | 364 | O | B <sup>c</sup>      | Fe    |
| 35  | <i>Acacia podalyriifolia</i> A. Cunn.                                         | No  | Leguminosae              | D | 26  | 2 | P | 1,666 | 1.7 | 3.3 | 6.6  | 364 | O | B <sup>c</sup>      | Fe    |
| 36  | <i>Acacia polycantha</i> Willd.                                               | No  | Leguminosae <sup>k</sup> | D | 52  | 4 | P | 588   | 0.6 | 1.1 | 2.2  | 320 | O | Gallus <sup>f</sup> | FC:PI |
| 37  | <i>Acacia pycnantha</i> Benth.                                                | No  | Leguminosae              | D | 26  | 2 | P | 1,764 | 1.8 | 3.6 | 7.1  | 364 | O | B <sup>c</sup>      | Fe    |
| 38  | <i>Acacia radiana</i> (Savi.) Brenan                                          | No  | Leguminosae <sup>k</sup> | D | 78  | 6 | P | 980   | 1.0 | 1.9 | 3.8  | 320 | O | Gallus <sup>f</sup> | FC:PI |
| 39b | <i>Acacia radiana</i> (Savi.) Brenan                                          | No  | Leguminosae <sup>k</sup> | D | 104 | 8 | P | 980   | 1.0 | 2.1 | 4.2  | 320 | O | Gallus <sup>f</sup> | FC:PI |
| 40b | <i>Acacia senegal</i> (L.) Willd. <sup>i</sup>                                | No  | Leguminosae <sup>k</sup> | D | 26  | 2 | P | 588   | 0.6 | 1.2 | 2.3  | 320 | O | Gallus <sup>f</sup> | FC:PI |
| 41a | <i>Acacia seyal</i> (Del.) var. <i>fistula</i>                                | No  | Leguminosae <sup>k</sup> | D | 104 | 8 | P | 1,078 | 1.1 | 2.1 | 4.3  | 320 | O | Gallus <sup>f</sup> | FC:PI |
| 41b | <i>Acacia seyal</i> (Del.) var. <i>seyal</i>                                  | No  | Leguminosae <sup>k</sup> | D | 104 | 8 | P | 1,078 | 1.1 | 2.2 | 4.4  | 320 | O | Gallus <sup>f</sup> | FC:PI |
| 42  | <i>Acacia sieberana</i> DC.                                                   | No  | Leguminosae <sup>k</sup> | D | 26  | 2 | P | 588   | 0.6 | 1.2 | 2.4  | 320 | O | Gallus <sup>f</sup> | FC:PI |
| 43  | <i>Acacia simsii</i> A. Cunn. ex Benth.                                       | No  | Leguminosae              | D | 26  | 2 | P | 2,058 | 2.1 | 4.2 | 8.4  | 364 | O | B <sup>c</sup>      | Fe    |
| 44  | <i>Acacia sophorae</i> Benth.                                                 | No  | Leguminosae <sup>k</sup> | D | 26  | 2 | P | 784   | 0.8 | 1.7 | 3.3  | 320 | O | Gallus <sup>f</sup> | FC:PI |
| 45a | <i>Acacia tortilis</i> (Forssk.) Hayne <sup>i</sup>                           | No  | Leguminosae <sup>k</sup> | D | 52  | 4 | P | 490   | 0.5 | 1.1 | 2.1  | 320 | O | Gallus <sup>f</sup> | FC:PI |
| 45b | <i>Acacia tortilis</i> (Forssk.) Hayne ssp.<br><i>spiracarpa</i>              | No  | Leguminosae <sup>k</sup> | D | 52  | 4 | P | 490   | 0.5 | 1.1 | 2.2  | 320 | O | Gallus <sup>f</sup> | FC:PI |
| 45c | <i>Acacia tortilis</i> (Forssk.) Hayne <sup>i</sup>                           | No  | Leguminosae <sup>k</sup> | D | 52  | 4 | P | 784   | 0.8 | 1.6 | 3.3  | 320 | O | Gallus <sup>f</sup> | FC:PI |
| 46  | <i>Acacia tortilis</i> (Forssk.) Hayne ssp.<br><i>radiana</i>                 | No  | Leguminosae <sup>k</sup> | D | 104 | 8 | P | 1,078 | 1.1 | 2.2 | 4.4  | 320 | O | Gallus <sup>f</sup> | FC:PI |
| 47  | <i>Achillea abrotanoides</i> Vis.                                             | Yes | Compositae               | D | 18  | 2 | P | 2,744 | 2.8 | 5.5 | 11.1 | 326 | O | B <sup>c</sup>      | Fe    |
| 48  | <i>Achillea ageratifolia</i> (Sibth. & Sm.)<br>Boiss.                         | Yes | Compositae               | D | 18  | 2 | P | 2,842 | 2.9 | 5.8 | 11.6 | 326 | O | B <sup>c</sup>      | Fe    |

‡ Chromosome number.

§ E, ephemeral; A, annual; B, biennial; P, perennial.

† O, original value; C, calibrated value

\* The standard species used to calibrate the present amount.

†† Fe, Feulgen microdensitometry; FC, flow cytometry using one of the following fluorochromes: PI, propidium iodide; DAPI, 4', 6-diamidino-2-phenylindole; EB, ethidium bromide; MI, mithramycin.

APPENDIX. (continued, the superscript letters refer to notes concerning this table)

| Entry number <sup>g</sup> | Species                                                                 | Voucher | Family     | Monocot or dicot | 2n <sub>t</sub> | Ploidy level (x) | Life cycle type <sup>h</sup> | DNA amount             |         |         |         | Original ref. <sup>a</sup> | Present amount <sup>†</sup> | Standard species* <sup>b1</sup> | Method <sup>††</sup> |
|---------------------------|-------------------------------------------------------------------------|---------|------------|------------------|-----------------|------------------|------------------------------|------------------------|---------|---------|---------|----------------------------|-----------------------------|---------------------------------|----------------------|
|                           |                                                                         |         |            |                  |                 |                  |                              | 1C (Mbp <sup>§</sup> ) | 1C (pg) | 2C (pg) | 4C (pg) |                            |                             |                                 |                      |
| 49                        | <i>Achillea ageratium</i> L.                                            | Yes     | Compositae | D                | 18              | 2                | P                            | 2,940                  | 3.0     | 6.0     | 12.0    | 326                        | O                           | B <sup>c</sup>                  | Fe                   |
| 50                        | <i>Achillea asiatica</i> Serg.                                          | Yes     | Compositae | D                | 36              | 4                | P                            | 4,900                  | 5.0     | 9.9     | 19.8    | 326                        | O                           | B <sup>c</sup>                  | Fe                   |
| 51                        | <i>Achillea asplenifolia</i> Vent.                                      | Yes     | Compositae | D                | 18              | 2                | P                            | 3,038                  | 3.1     | 6.2     | 12.5    | 326                        | O                           | B <sup>c</sup>                  | Fe                   |
| 52                        | <i>Achillea Biebersteinii</i> Afanasiev                                 | Yes     | Compositae | D                | 18              | 2                | P                            | 2,548                  | 2.6     | 5.3     | 10.5    | 326                        | O                           | B <sup>c</sup>                  | Fe                   |
| 53                        | <i>Achillea borealis</i> Bong.                                          | Yes     | Compositae | D                | 54              | 6                | P                            | 7,252                  | 7.4     | 14.9    | 29.7    | 326                        | O                           | B <sup>c</sup>                  | Fe                   |
| 54                        | <i>Achillea chamamelifolia</i> Pourr.                                   | Yes     | Compositae | D                | 18              | 2                | P                            | 3,332                  | 3.4     | 6.8     | 13.5    | 326                        | O                           | B <sup>c</sup>                  | Fe                   |
| 55                        | <i>Achillea clavata</i> L.                                              | Yes     | Compositae | D                | 18              | 2                | P                            | 2,940                  | 3.0     | 6.1     | 12.2    | 326                        | O                           | B <sup>c</sup>                  | Fe                   |
| 56                        | <i>Achillea clypeolata</i> Sibth. & Sm.                                 | Yes     | Compositae | D                | 18              | 2                | P                            | 2,646                  | 2.7     | 5.4     | 10.8    | 326                        | O                           | B <sup>c</sup>                  | Fe                   |
| 57                        | <i>Achillea collina</i> J.Becker ex Reichenb.                           | Yes     | Compositae | D                | 36              | 4                | P                            | 4,900                  | 5.0     | 9.9     | 19.8    | 326                        | O                           | B <sup>c</sup>                  | Fe                   |
| 58                        | <i>Achillea compacta</i> Willd.                                         | Yes     | Compositae | D                | 18              | 2                | P                            | 2,450                  | 2.5     | 4.9     | 9.8     | 326                        | O                           | B <sup>c</sup>                  | Fe                   |
| 59                        | <i>Achillea crithmifolia</i> Waldst. & Kit.                             | Yes     | Compositae | D                | 18              | 2                | P                            | 2,450                  | 2.5     | 4.9     | 9.8     | 326                        | O                           | B <sup>c</sup>                  | Fe                   |
| 60                        | <i>Achillea crithmifolia</i> Waldst. & Kit.                             | Yes     | Compositae | D                | 36              | 4                | P                            | 5,096                  | 5.2     | 10.5    | 21.0    | 326                        | O                           | B <sup>c</sup>                  | Fe                   |
| 61                        | <i>Achillea distans</i> Waldst. & Kit.                                  | Yes     | Compositae | D                | 54              | 6                | P                            | 8,526                  | 8.7     | 17.5    | 35.0    | 326                        | O                           | B <sup>c</sup>                  | Fe                   |
| 62                        | <i>Achillea erba-rotta</i> All.                                         | Yes     | Compositae | D                | 18              | 2                | P                            | 2,646                  | 2.7     | 5.4     | 10.7    | 326                        | O                           | B <sup>c</sup>                  | Fe                   |
| 63                        | <i>Achillea filipendulina</i> Lam.                                      | Yes     | Compositae | D                | 18              | 2                | P                            | 2,842                  | 2.9     | 5.8     | 11.6    | 326                        | O                           | B <sup>c</sup>                  | Fe                   |
| 64                        | <i>Achillea glaberrima</i> Klok.                                        | Yes     | Compositae | D                | 18              | 2                | P                            | 2,744                  | 2.8     | 5.7     | 11.3    | 326                        | O                           | B <sup>c</sup>                  | Fe                   |
| 65                        | <i>Achillea grandifolia</i> Friv.                                       | Yes     | Compositae | D                | 18              | 2                | P                            | 3,234                  | 3.3     | 6.6     | 13.1    | 326                        | O                           | B <sup>c</sup>                  | Fe                   |
| 66                        | <i>Achillea impatiens</i> L.                                            | Yes     | Compositae | D                | 18              | 2                | P                            | 3,038                  | 3.1     | 6.1     | 12.2    | 326                        | O                           | B <sup>c</sup>                  | Fe                   |
| 67                        | <i>Achillea lanulosa</i> Nutt.                                          | Yes     | Compositae | D                | 36              | 4                | P                            | 4,998                  | 5.1     | 10.1    | 20.2    | 326                        | O                           | B <sup>c</sup>                  | Fe                   |
| 68                        | <i>Achillea ligustica</i> All.                                          | Yes     | Compositae | D                | 18              | 2                | P                            | 3,136                  | 3.2     | 6.5     | 13.0    | 326                        | O                           | B <sup>c</sup>                  | Fe                   |
| 69                        | <i>Achillea linguata</i> Waldst. & Kit.                                 | Yes     | Compositae | D                | 18              | 2                | P                            | 3,234                  | 3.3     | 6.5     | 13.1    | 326                        | O                           | B <sup>c</sup>                  | Fe                   |
| 70                        | <i>Achillea macrophylla</i> L.                                          | Yes     | Compositae | D                | 18              | 2                | P                            | 3,038                  | 3.1     | 6.2     | 12.4    | 326                        | O                           | B <sup>c</sup>                  | Fe                   |
| 71b                       | <i>Achillea millefolium</i> L.                                          | Yes     | Compositae | D                | 54              | 6                | P                            | 7,154                  | 7.3     | 14.7    | 29.4    | 326                        | O                           | B <sup>c</sup>                  | Fe                   |
| 71c                       | <i>Achillea millefolium</i> L. ssp. <i>sudetica</i>                     | Yes     | Compositae | D                | 54              | 6                | P                            | 7,840                  | 8.0     | 15.9    | 31.8    | 326                        | O                           | B <sup>c</sup>                  | Fe                   |
| 72                        | <i>Achillea nobilis</i> L.                                              | Yes     | Compositae | D                | 18              | 2                | P                            | 2,646                  | 2.7     | 5.3     | 10.7    | 326                        | O                           | B <sup>c</sup>                  | Fe                   |
| 73                        | <i>Achillea ochroleuca</i> Ehrh.                                        | Yes     | Compositae | D                | 18              | 2                | P                            | 2,842                  | 2.9     | 5.8     | 11.6    | 326                        | O                           | B <sup>c</sup>                  | Fe                   |
| 74a                       | <i>Achillea pannonica</i> Scheele Ligota Dolina population <sup>h</sup> | Yes     | Compositae | D                | 72              | 8                | P                            | 9,310                  | 9.5     | 19.1    | 38.2    | 326                        | O                           | B <sup>c</sup>                  | Fe                   |
| 74b                       | <i>Achillea pannonica</i> Scheele Busko population <sup>h</sup>         | Yes     | Compositae | D                | 72              | 8                | P                            | 10,094                 | 10.3    | 20.6    | 41.3    | 326                        | O                           | B <sup>c</sup>                  | Fe                   |
| 75                        | <i>Achillea ptarmica</i> L.                                             | Yes     | Compositae | D                | 18              | 2                | P                            | 2,842                  | 2.9     | 5.8     | 11.6    | 326                        | O                           | B <sup>c</sup>                  | Fe                   |
| 76                        | <i>Achillea salicifolia</i> Bess.                                       | Yes     | Compositae | D                | 18              | 2                | P                            | 3,038                  | 3.1     | 6.3     | 12.5    | 326                        | O                           | B <sup>c</sup>                  | Fe                   |
| 77                        | <i>Achillea setacea</i> Waldst. & Kit.                                  | Yes     | Compositae | D                | 18              | 2                | P                            | 2,842                  | 2.9     | 5.9     | 11.7    | 326                        | O                           | B <sup>c</sup>                  | Fe                   |
| 78                        | <i>Achillea sibirica</i> Ledeb.                                         | Yes     | Compositae | D                | 36              | 4                | P                            | 4,998                  | 5.1     | 10.3    | 20.5    | 326                        | O                           | B <sup>c</sup>                  | Fe                   |
| 79                        | <i>Achillea stricta</i> Schleich. ex Grembli (Koch)                     | Yes     | Compositae | D                | 54              | 6                | P                            | 7,252                  | 7.4     | 14.9    | 29.8    | 326                        | O                           | B <sup>c</sup>                  | Fe                   |
| 80                        | <i>Achillea sulphurea</i> Boiss.                                        | Yes     | Compositae | D                | 18              | 2                | P                            | 2,646                  | 2.7     | 5.5     | 10.9    | 326                        | O                           | B <sup>c</sup>                  | Fe                   |
| 81                        | <i>Achillea tanacetifolia</i> All.                                      | Yes     | Compositae | D                | 54              | 6                | P                            | 7,546                  | 7.7     | 15.5    | 30.9    | 326                        | O                           | B <sup>c</sup>                  | Fe                   |

|      |                                                                                           |     |                        |   |                |                |   |        |      |      |       |                   |   |                                 |       |
|------|-------------------------------------------------------------------------------------------|-----|------------------------|---|----------------|----------------|---|--------|------|------|-------|-------------------|---|---------------------------------|-------|
| 82   | <i>Achillea teretifolia</i> Willd.                                                        | Yes | Compositae             | D | 18             | 2              | P | 2,548  | 2.6  | 5.1  | 10.2  | 326               | O | B <sup>c</sup>                  | Fe    |
| 83   | <i>Achillea tomentosa</i> L.                                                              | Yes | Compositae             | D | 18             | 2              | P | 2,940  | 3.0  | 6.0  | 11.9  | 326               | O | B <sup>c</sup>                  | Fe    |
| 84   | <i>Achillea vermicularis</i> Trin.                                                        | Yes | Compositae             | D | 18             | 2              | P | 2,842  | 2.9  | 5.8  | 11.5  | 326               | O | B <sup>c</sup>                  | Fe    |
| 85   | <i>Actinidia arguta</i> (Sieb. & Zucc.)<br>Planch. ex Miq. var. <i>arguta</i>             | No  | Actinidiaceae          | D | 116°           | 4              | P | 1,470  | 1.5  | 3.1  | 6.2   | 344               | O | F <sup>d</sup>                  | FC:PI |
| 86   | <i>Actinidia chinensis</i> Planch. var.<br><i>chinensis</i>                               | No  | Actinidiaceae          | D | 58°            | 2              | P | 784    | 0.8  | 1.5  | 3.1   | 344               | O | F <sup>d</sup> & H <sup>c</sup> | FC:PI |
| 87   | <i>Actinidia deliciosa</i> (A.Chev.)<br>C.F.Liang & A.R.Ferguson var.<br><i>deliciosa</i> | No  | Actinidiaceae          | D | 174°           | 6              | P | 2,156  | 2.2  | 4.4  | 8.9   | 344               | O | F <sup>d</sup>                  | FC:PI |
| 88   | <i>Actinidia eriantha</i> Benth.                                                          | No  | Actinidiaceae          | D | c.174°         | 6              | P | 745    | 0.8  | 1.5  | 3.0   | 344               | O | F <sup>d</sup>                  | FC:PI |
| 89   | <i>Actinidia kolomikta</i> (Maxim. &<br>Rupr.) Maxim.                                     | No  | Actinidiaceae          | D | c.174°         | 6              | P | 681    | 0.7  | 1.4  | 2.8   | 344               | O | F <sup>d</sup>                  | FC:PI |
| 90   | <i>Actinidia polygama</i> (Sieb. & Zucc.)<br>Maxim.                                       | No  | Actinidiaceae          | D | c.174°         | 6              | P | 769    | 0.8  | 1.6  | 3.1   | 344               | O | F <sup>d</sup>                  | FC:PI |
| 91   | <i>Ada ocanensis</i> (Lindl.)<br>N.H. Williams                                            | No  | Orchidaceae            | M | — <sup>n</sup> | — <sup>p</sup> | P | 3,626  | 3.7  | 7.4  | 14.8  | 377               | O | F                               | Fe    |
| 92   | <i>Agropyron cristatum</i> (L.) Gaertner <sup>i</sup>                                     | No  | Gramineae <sup>i</sup> | M | 14             | 2              | P | 6,958  | 7.1  | 14.3 | 28.5  | 343 <sup>al</sup> | O | A <sup>c</sup> & F <sup>c</sup> | FC:PI |
| 93   | <i>Agropyron desertorum</i> (Fischer ex<br>Link) Shultes <sup>i</sup>                     | No  | Gramineae <sup>i</sup> | M | 28             | 4              | P | 12,936 | 13.2 | 26.4 | 52.8  | 343 <sup>al</sup> | O | A <sup>c</sup> & F <sup>c</sup> | FC:PI |
| 94   | <i>Agropyron mongolicum</i> Keng <sup>i</sup>                                             | No  | Gramineae <sup>i</sup> | M | 14             | 2              | P | 7,644  | 7.8  | 15.6 | 31.1  | 343 <sup>al</sup> | O | A <sup>c</sup> & F <sup>c</sup> | FC:PI |
| 95c  | <i>Allium aflatanense</i> B.Fedtsch.                                                      | Yes | Alliaceae              | M | 16             | 2              | P | 21,148 | 21.6 | 43.2 | 86.3  | 336 <sup>ai</sup> | O | C                               | Fe    |
| 96c  | <i>Allium angulosum</i> L.                                                                | Yes | Alliaceae              | M | 16             | 2              | P | 13,680 | 14.0 | 27.9 | 55.8  | 336 <sup>ai</sup> | O | C                               | Fe    |
| 97c  | <i>Allium carinatum</i> L. ssp.<br><i>carinatum</i> <sup>h &amp; ai</sup>                 | Yes | Alliaceae              | M | 16             | 2              | P | 15,077 | 15.4 | 30.8 | 61.5  | 336 <sup>ai</sup> | O | C                               | Fe    |
| 97d  | <i>Allium carinatum</i> L. ssp.<br><i>carinatum</i> <sup>h &amp; ai</sup>                 | Yes | Alliaceae              | M | 16             | 2              | P | 16,479 | 16.8 | 33.6 | 67.2  | 336 <sup>ai</sup> | O | C                               | Fe    |
| 98b  | <i>Allium carinatum</i> L. ssp. <i>carinatum</i>                                          | Yes | Alliaceae              | M | 24             | 3              | P | 22,300 | 22.8 | 45.5 | 91.0  | 336 <sup>ai</sup> | O | C                               | Fe    |
| 99j  | <i>Allium cepa</i> L.                                                                     | Yes | Alliaceae              | M | 16             | 2              | P | 16,469 | 16.8 | 33.6 | 67.2  | 336 <sup>ai</sup> | O | C                               | Fe    |
| 100b | <i>Allium cepa</i> L. var. <i>viviparum</i> <sup>aj</sup>                                 | Yes | Alliaceae              | M | 16             | 2              | P | 14,078 | 14.4 | 28.7 | 57.5  | 336 <sup>ai</sup> | O | C                               | Fe    |
| 101d | <i>Allium cernuum</i> Roth.                                                               | Yes | Alliaceae              | M | 14             | 2              | P | 22,432 | 22.9 | 45.8 | 91.6  | 336 <sup>ai</sup> | O | C                               | Fe    |
| 102d | <i>Allium christophii</i> Trautv.                                                         | Yes | Alliaceae              | M | 16             | 2              | P | 20,521 | 20.9 | 41.9 | 83.8  | 336 <sup>ai</sup> | O | C                               | Fe    |
| 103e | <i>Allium fistulosum</i> L.                                                               | Yes | Alliaceae              | M | 16             | 2              | P | 11,638 | 11.9 | 23.8 | 47.5  | 336 <sup>ai</sup> | O | C                               | Fe    |
| 104c | <i>Allium flavum</i> L. ssp. <i>flavum</i>                                                | Yes | Alliaceae              | M | 16             | 2              | P | 12,515 | 12.8 | 25.5 | 51.1  | 336 <sup>ai</sup> | O | C                               | Fe    |
| 105  | <i>Allium flavum</i> L. ssp. <i>flavum</i>                                                | Yes | Alliaceae              | M | 32             | 4              | P | 19,968 | 20.4 | 40.8 | 81.5  | 336 <sup>ai</sup> | O | C                               | Fe    |
| 106e | <i>Allium galanthum</i> Kar. & Kir.                                                       | Yes | Alliaceae              | M | 16             | 2              | P | 14,612 | 14.9 | 29.8 | 59.6  | 336 <sup>ai</sup> | O | C                               | Fe    |
| 107c | <i>Allium giganteum</i> Regel                                                             | Yes | Alliaceae              | M | 16             | 2              | P | 20,168 | 20.6 | 41.2 | 82.3  | 336 <sup>ai</sup> | O | C                               | Fe    |
| 108  | <i>Allium hirtifolium</i> Boiss.                                                          | Yes | Alliaceae              | M | 16             | 2              | P | 21,041 | 21.5 | 42.9 | 85.9  | 336 <sup>ai</sup> | O | C                               | Fe    |
| 109d | <i>Allium karataviense</i> Regel                                                          | Yes | Alliaceae              | M | 18             | 2              | P | 19,443 | 19.8 | 39.7 | 79.4  | 336 <sup>ai</sup> | O | C                               | Fe    |
| 110d | <i>Allium moly</i> L.                                                                     | Yes | Alliaceae              | M | 14             | 2              | P | 22,266 | 22.7 | 45.4 | 90.9  | 336 <sup>ai</sup> | O | C                               | Fe    |
| 111  | <i>Allium nutans</i> L.                                                                   | Yes | Alliaceae              | M | 66             | 8              | P | 46,530 | 47.5 | 95.0 | 189.9 | 336 <sup>ai</sup> | O | C                               | Fe    |
| 112c | <i>Allium obliquum</i> L.                                                                 | Yes | Alliaceae              | M | 16             | 2              | P | 10,618 | 10.8 | 21.7 | 43.3  | 336 <sup>ai</sup> | O | C                               | Fe    |
| 113b | <i>Allium oleraceum</i> L.                                                                | Yes | Alliaceae              | M | 40             | 5              | P | 29,581 | 30.2 | 60.4 | 120.7 | 336 <sup>ai</sup> | O | C                               | Fe    |
| 114c | <i>Allium oreophilum</i> Meyer                                                            | Yes | Alliaceae              | M | 16             | 2              | P | 20,825 | 21.3 | 42.5 | 85.0  | 336 <sup>ai</sup> | O | C                               | Fe    |

APPENDIX. (continued, the superscript letters refer to notes concerning this table)

| Entry number <sup>g</sup> | Species                                                           | Voucher | Family           | Monocot or dicot | Ploidy level (x) | Life cycle type <sup>h</sup> | DNA amount             |         |         |         | Original ref. <sup>a</sup> | Present amount <sup>†</sup> species* <sup>b1</sup> | Method <sup>††</sup> |       |
|---------------------------|-------------------------------------------------------------------|---------|------------------|------------------|------------------|------------------------------|------------------------|---------|---------|---------|----------------------------|----------------------------------------------------|----------------------|-------|
|                           |                                                                   |         |                  |                  |                  |                              | IC (Mbp <sup>s</sup> ) | IC (pg) | 2C (pg) | 4C (pg) |                            |                                                    |                      |       |
| 115c                      | <i>Allium paradoxum</i> (Bieb.) G. Don                            | Yes     | Alliaceae        | M                | 16               | P                            | 25,745                 | 26.3    | 52.5    | 105.1   | 336 <sup>ai</sup>          | O                                                  | C                    | Fe    |
| 116f                      | <i>Allium porrum</i> L.                                           | Yes     | Alliaceae        | M                | 32               | P                            | 26,592                 | 27.1    | 54.3    | 108.5   | 336 <sup>ai</sup>          | O                                                  | C                    | Fe    |
| 117d                      | <i>Allium sativum</i> L.                                          | Yes     | Alliaceae        | M                | 16               | P                            | 16,508                 | 16.8    | 33.7    | 67.4    | 336 <sup>ai</sup>          | O                                                  | C                    | Fe    |
| 118d                      | <i>Allium schoenoprasum</i> L.                                    | Yes     | Alliaceae        | M                | 16               | P                            | 7,473                  | 7.6     | 15.3    | 30.5    | 336 <sup>ai</sup>          | O                                                  | C                    | Fe    |
| 119b                      | <i>Allium senescens</i> L. ssp. <i>montanum</i>                   | Yes     | Alliaceae        | M                | 32               | P                            | 22,452                 | 22.9    | 45.8    | 91.6    | 336 <sup>ai</sup>          | O                                                  | C                    | Fe    |
| 120                       | <i>Allium scitulum</i> Ucria                                      | Yes     | Alliaceae        | M                | 18               | P                            | 34,712                 | 35.4    | 70.8    | 141.7   | 336 <sup>ai</sup>          | O                                                  | C                    | Fe    |
| 121b                      | <i>Allium sphaerocephalon</i> L. ssp. <i>sphaerocephalon</i>      | Yes     | Alliaceae        | M                | 16               | P                            | 12,275                 | 12.5    | 25.1    | 50.1    | 336 <sup>ai</sup>          | O                                                  | C                    | Fe    |
| 122                       | <i>Allium sphaerocephalon</i> L.                                  | Yes     | Alliaceae        | M                | 24               | P                            | 19,654                 | 20.1    | 40.1    | 80.2    | 336 <sup>ai</sup>          | O                                                  | C                    | Fe    |
| 123c                      | <i>Allium stipitatum</i> Regel                                    | Yes     | Alliaceae        | M                | 16               | P                            | 21,070                 | 21.5    | 43.0    | 86.0    | 336 <sup>ai</sup>          | O                                                  | C                    | Fe    |
| 124c                      | <i>Allium tuberosum</i> Rottl. ex Spreng.                         | Yes     | Alliaceae        | M                | 32               | P                            | 31,448                 | 32.1    | 64.2    | 128.4   | 336 <sup>ai</sup>          | O                                                  | C                    | Fe    |
| 125d                      | <i>Allium ursinum</i> L. ssp. <i>ursinum</i>                      | Yes     | Alliaceae        | M                | 14               | P                            | 29,567                 | 30.2    | 60.3    | 120.7   | 336 <sup>ai</sup>          | O                                                  | C                    | Fe    |
| 126                       | <i>Amaranthus caudatus</i> L.                                     | No      | Amaranthaceae    | D                | 32               | A                            | 588                    | 0.6     | 1.3     | 2.5     | 359                        | O                                                  | H                    | FC:PI |
| 127b                      | <i>Amaranthus cruentus</i> L.                                     | No      | Amaranthaceae    | D                | 32               | A                            | 588                    | 0.6     | 1.3     | 2.5     | 359                        | O                                                  | H                    | FC:PI |
| 128b                      | <i>Amaranthus hybridus</i> L.                                     | No      | Amaranthaceae    | D                | 32               | A                            | 588                    | 0.6     | 1.3     | 2.5     | 359                        | O                                                  | H                    | FC:PI |
| 129c                      | <i>Amaranthus hypochondriacus</i> L.                              | No      | Amaranthaceae    | D                | 32               | A                            | 588                    | 0.6     | 1.3     | 2.5     | 359                        | O                                                  | H                    | FC:PI |
| 130                       | <i>Amaranthus powellii</i> S. Wats.                               | No      | Amaranthaceae    | D                | 32               | A                            | 588                    | 0.6     | 1.2     | 2.4     | 359                        | O                                                  | H                    | FC:PI |
| 131                       | <i>Amaranthus quitensis</i> H.B. & K.                             | No      | Amaranthaceae    | D                | 32               | A                            | 588                    | 0.6     | 1.2     | 2.4     | 359                        | O                                                  | H                    | FC:PI |
| 132                       | <i>Amaranthus retroflexus</i> L.                                  | Yes     | Amaranthaceae    | D                | 32               | A                            | 882                    | 0.9     | 1.7     | 3.4     | 375                        | O                                                  | F                    | Fe    |
| 133                       | <i>Amaranthus spinosus</i> L.                                     | Yes     | Amaranthaceae    | D                | 34               | A                            | 980                    | 1.0     | 1.9     | 3.8     | 375                        | O                                                  | F                    | Fe    |
| 134b                      | <i>Amaranthus tricolor</i> L.                                     | No      | Amaranthaceae    | D                | 32               | A                            | 882                    | 0.9     | 1.8     | 3.6     | 359                        | O                                                  | H                    | FC:PI |
| 135                       | <i>Amsinckia douglasiana</i> A. DC.                               | Yes     | Boraginaceae     | D                | — <sup>n</sup>   | A                            | 980                    | 1.0     | 2.0     | 4.0     | 377                        | O                                                  | F                    | Fe    |
| 136                       | <i>Amsinckia furcata</i> Suksdorf                                 | Yes     | Boraginaceae     | D                | — <sup>n</sup>   | A                            | 1,274                  | 1.3     | 2.6     | 5.2     | 377                        | O                                                  | F                    | Fe    |
| 137                       | <i>Amsinckia spectabilis</i> Fisch. & Mey. var. <i>microcarpa</i> | Yes     | Boraginaceae     | D                | — <sup>n</sup>   | A                            | 1,078                  | 1.1     | 2.2     | 4.4     | 377                        | O                                                  | F                    | Fe    |
| 138                       | <i>Anagallis arvensis</i> L. cv. <i>caerulea</i>                  | Yes     | Primulaceae      | D                | 40               | A                            | 1,764                  | 1.8     | 3.5     | 7.0     | 375                        | O                                                  | F                    | Fe    |
| 139c                      | <i>Andropogon gerardii</i> Vitman                                 | No      | Gramineae        | M                | 60               | P                            | 3,528                  | 3.6     | 7.2     | 14.3    | 367                        | O                                                  | Gallus <sup>f</sup>  | FC:MI |
| 140                       | <i>Andropogon gerardii</i> Vitman                                 | No      | Gramineae        | M                | 70               | P                            | 4,214                  | 4.3     | 8.6     | 17.3    | 367                        | O                                                  | Gallus <sup>f</sup>  | FC:MI |
| 141b                      | <i>Andropogon gerardii</i> Vitman                                 | No      | Gramineae        | M                | 80               | P                            | 4,900                  | 5.0     | 10.0    | 20.1    | 367                        | O                                                  | Gallus <sup>f</sup>  | FC:MI |
| 142                       | <i>Andropogon gerardii</i> Vitman                                 | No      | Gramineae        | M                | 90               | P                            | 5,096                  | 5.2     | 10.3    | 20.7    | 367                        | O                                                  | Gallus <sup>f</sup>  | FC:MI |
| 143                       | <i>Anemarrhena asphodeloides</i> Bunge                            | Yes     | Anemarrheneaceae | M                | 22               | P                            | 2,842                  | 2.9     | 5.8     | 11.5    | 317                        | O                                                  | B                    | Fe    |
| 144                       | <i>Annona cacans</i> Warm.                                        | Yes     | Annonaceae       | D                | 14               | P                            | 980                    | 1.0     | 2.0     | 4.0     | 341                        | O                                                  | B <sup>c</sup>       | Fe    |
| 145                       | <i>Annona glabra</i> L.                                           | Yes     | Annonaceae       | D                | 28               | P                            | 1,274                  | 1.3     | 2.7     | 5.4     | 341                        | O                                                  | B <sup>c</sup>       | Fe    |
| 146                       | <i>Annona lutescens</i> Saff.                                     | Yes     | Annonaceae       | D                | 28               | P                            | 980                    | 1.0     | 2.0     | 4.0     | 341                        | O                                                  | B <sup>c</sup>       | Fe    |
| 147b                      | <i>Annona reticulata</i> L.                                       | Yes     | Annonaceae       | D                | 14               | P                            | 784                    | 0.8     | 1.7     | 3.3     | 341                        | O                                                  | B <sup>c</sup>       | Fe    |
| 148                       | <i>Annona sericea</i> <sup>1</sup>                                | Yes     | Annonaceae       | D                | — <sup>n</sup>   | P                            | 686                    | 0.7     | 1.4     | 2.7     | 341                        | O                                                  | B <sup>c</sup>       | Fe    |
| 149                       | <i>Ansellia africana</i> Lindl.                                   | No      | Orchidaceae      | M                | 42 <sup>o</sup>  | P                            | 1,813 <sup>t</sup>     | 1.6     | 3.7     | 7.4     | 307                        | O                                                  | Gallus <sup>f</sup>  | FC:PI |
| 150b                      | <i>Anthemis tinctoria</i> L.                                      | Yes     | Compositae       | D                | 18               | P                            | 3,964                  | 4.0     | 8.1     | 16.2    | 326                        | O                                                  | B <sup>c</sup>       | Fe    |
| 151c                      | <i>Antirrhinum majus</i> L.                                       | Yes     | Scrophulariaceae | D                | 16               | P                            | 515                    | 0.5     | 1.1     | 2.1     | 377                        | O                                                  | J                    | Fe    |



|      |                                                                       |                |                          |   |                    |                |   |                    |      |      |       |                   |   |                                 |       |
|------|-----------------------------------------------------------------------|----------------|--------------------------|---|--------------------|----------------|---|--------------------|------|------|-------|-------------------|---|---------------------------------|-------|
| 152  | <i>Apera spica-venti</i> (L.) Beauv.                                  | Yes            | Gramineae                | M | 14                 | 2              | A | 5,292              | 5.4  | 10.8 | 21.6  | 375               | O | F                               | Fe    |
| 153f | <i>Arabidopsis thaliana</i> (L.) Heynh.                               | — <sup>m</sup> | Cruciferae               | D | 10 <sup>o</sup>    | 2              | A | 164                | 0.2  | 0.3  | 0.7   | 350               | O | B <sup>c</sup> & G <sup>c</sup> | Fe    |
| 154b | <i>Armeria maritima</i> (Mill.) Willd. <sup>h</sup>                   | Yes            | Plumbaginaceae           | D | 18                 | 2              | P | 4,018              | 4.1  | 8.2  | 16.4  | 318               | O | <i>Petunia</i> <sup>f</sup>     | FC:EB |
| 154c | <i>Armeria maritima</i> (Mill.) Willd. <sup>h</sup>                   | Yes            | Plumbaginaceae           | D | 18                 | 2              | P | 4,508              | 4.6  | 9.1  | 18.2  | 318               | O | <i>Petunia</i> <sup>f</sup>     | FC:EB |
| 155b | <i>Artemisia absinthium</i> L.                                        | Yes            | Compositae               | D | 18                 | 2              | P | 3,726              | 3.8  | 7.6  | 15.2  | 326               | O | B <sup>c</sup>                  | Fe    |
| 156  | <i>Asimina triloba</i> (L.) Dun.                                      | Yes            | Annonaceae               | D | — <sup>n</sup>     | — <sup>p</sup> | P | 784                | 0.8  | 1.6  | 3.2   | 341               | O | B <sup>c</sup>                  | Fe    |
| 157  | <i>Barkeria lindleyana</i> Batem. ex Lindl.                           | No             | Orchidaceae              | M | — <sup>n</sup>     | — <sup>p</sup> | P | 1,612 <sup>1</sup> | 1.7  | 3.3  | 6.6   | 307               | O | <i>Gallus</i> <sup>f</sup>      | FC:PI |
| 158  | <i>Berberis bidentata</i> Lechl.                                      | Yes            | Berberidaceae            | D | 28                 | 2              | P | 784                | 0.8  | 1.5  | 3.0   | 353               | O | B                               | Fe    |
| 159  | <i>Berberis buxifolia</i> Lam.                                        | Yes            | Berberidaceae            | D | 56                 | 4              | P | 2,940              | 3.0  | 6.1  | 12.1  | 353               | O | B                               | Fe    |
| 160  | <i>Berberis cabrerae</i> Job                                          | Yes            | Berberidaceae            | D | 28                 | 2              | P | 784                | 0.8  | 1.7  | 3.3   | 353               | O | B                               | Fe    |
| 161  | <i>Berberis chillanensis</i> (Schm.) Sragne                           | Yes            | Berberidaceae            | D | 28                 | 2              | P | 882                | 0.9  | 1.7  | 3.4   | 353               | O | B                               | Fe    |
| 162  | <i>Berberis darwinii</i> Hook.                                        | Yes            | Berberidaceae            | D | 28                 | 2              | P | 1,568              | 1.6  | 3.1  | 6.2   | 353               | O | B                               | Fe    |
| 163  | <i>Berberis empetrifolia</i> Lam.                                     | Yes            | Berberidaceae            | D | 28                 | 2              | P | 1,764              | 1.8  | 3.6  | 7.3   | 353               | O | B                               | Fe    |
| 164  | <i>Berberis heterophylla</i> Juss                                     | Yes            | Berberidaceae            | D | 56                 | 4              | P | 3,038              | 3.1  | 6.2  | 12.4  | 353               | O | B                               | Fe    |
| 165  | <i>Berberis linearifolia</i> Phil.                                    | Yes            | Berberidaceae            | D | 28                 | 2              | P | 1,666              | 1.7  | 3.4  | 6.8   | 353               | O | B                               | Fe    |
| 166  | <i>Berberis montana</i> Gay.                                          | Yes            | Berberidaceae            | D | 28                 | 2              | P | 882                | 0.9  | 1.7  | 3.4   | 353               | O | B                               | Fe    |
| 167  | <i>Berberis parodii</i> Job                                           | Yes            | Berberidaceae            | D | 28                 | 2              | P | 1,568              | 1.6  | 3.1  | 6.3   | 353               | O | B                               | Fe    |
| 168  | <i>Berberis serrato-dentata</i> Lechl.                                | Yes            | Berberidaceae            | D | 28                 | 2              | P | 882                | 0.9  | 1.8  | 3.7   | 353               | O | B                               | Fe    |
| 169  | <i>Borago officinalis</i> L.                                          | No             | Boraginaceae             | D | 16 <sup>o</sup>    | 2              | A | 1,666              | 1.7  | 3.5  | 7.0   | 373               | O | G <sup>b2</sup>                 | FC:PI |
| 170  | <i>Brachycome dichromosomatica</i> C.R.Carter                         | Yes            | Compositae               | D | 4                  | 2              | A | 1,078              | 1.1  | 2.2  | 4.5   | 376               | O | J                               | Fe    |
| 171  | <i>Brahea dulcis</i> <sup>1</sup>                                     | Yes            | Palmae                   | M | — <sup>n</sup>     | — <sup>p</sup> | P | 27,582             | 28.1 | 56.3 | 112.6 | 377               | O | B                               | Fe    |
| 172  | <i>Brassia maculata</i> R.Br.                                         | No             | Orchidaceae              | M | 60 <sup>o</sup>    | — <sup>p</sup> | P | 1,832 <sup>1</sup> | 1.6  | 3.7  | 7.4   | 307               | O | <i>Gallus</i> <sup>f</sup>      | FC:PI |
| 173  | <i>Brassia verrucosa</i> Lindl.                                       | Yes            | Orchidaceae              | M | 52-60 <sup>o</sup> | — <sup>p</sup> | P | 3,822              | 3.9  | 7.8  | 15.7  | 377               | O | F                               | Fe    |
| 174  | <i>Broughtonia sanguinea</i> (Sw.) R.Br.                              | No             | Orchidaceae              | M | 40 <sup>o</sup>    | — <sup>p</sup> | P | 1,039 <sup>1</sup> | 1.1  | 2.1  | 4.2   | 307               | O | <i>Gallus</i> <sup>f</sup>      | FC:PI |
| 175  | <i>Bulbophyllum coccinum</i> Batem. ex Lindl.                         | No             | Orchidaceae              | M | 38 <sup>o</sup>    | — <sup>p</sup> | P | 2,621 <sup>1</sup> | 2.7  | 5.4  | 10.8  | 307               | O | <i>Gallus</i> <sup>f</sup>      | FC:PI |
| 176  | <i>Cadetia taylori</i> (F.Muell.) Schltr.                             | No             | Orchidaceae              | M | — <sup>n</sup>     | — <sup>p</sup> | P | 936 <sup>1</sup>   | 1.0  | 1.9  | 3.8   | 307               | O | <i>Gallus</i> <sup>f</sup>      | FC:PI |
| 177d | <i>Cajanus cajan</i> (L.) Huth                                        | Yes            | Leguminosae <sup>1</sup> | D | 22                 | 2              | P | 784                | 0.8  | 1.6  | 3.3   | 360 <sup>ar</sup> | O | <i>Glycine</i> <sup>e</sup>     | FC:PI |
| 177e | <i>Cajanus cajan</i> (L.) Huth                                        | Yes            | Leguminosae <sup>1</sup> | D | 22                 | 2              | P | 882                | 0.9  | 1.7  | 3.4   | 360 <sup>ar</sup> | O | B <sup>c</sup> & G <sup>c</sup> | Fe    |
| 178  | <i>Calamus caesioides</i> Blume                                       | Yes            | Palmae                   | M | — <sup>n</sup>     | — <sup>p</sup> | P | 1,470              | 1.5  | 2.9  | 5.8   | 377               | O | B                               | Fe    |
| 179  | <i>Calamus subinermis</i> Wendl. ex Becc.                             | Yes            | Palmae                   | M | — <sup>n</sup>     | — <sup>p</sup> | P | 2,058              | 2.1  | 4.3  | 8.6   | 377               | O | B                               | Fe    |
| 180  | <i>Calathea bachemiana</i> E.Morr.                                    | No             | Marantaceae              | M | 26                 | 2              | P | 392                | 0.4  | 0.8  | 1.5   | 355               | C | J <sup>ao</sup>                 | Fe    |
| 181  | <i>Calathea clossoni</i> <sup>1</sup>                                 | No             | Marantaceae              | M | 26                 | 2              | P | 392                | 0.4  | 0.8  | 1.5   | 355               | C | J <sup>ao</sup>                 | Fe    |
| 182  | <i>Calathea insignis</i> Petersen                                     | No             | Marantaceae              | M | 28                 | 2              | P | 392                | 0.4  | 0.8  | 1.6   | 355               | C | J <sup>ao</sup>                 | Fe    |
| 183  | <i>Calathea kegeliana</i> <sup>1</sup>                                | No             | Marantaceae              | M | 28                 | 2              | P | 490                | 0.5  | 1.1  | 2.1   | 355               | C | J <sup>ao</sup>                 | Fe    |
| 184  | <i>Calathea lietzei</i> E.Morr.                                       | No             | Marantaceae              | M | 24                 | 2              | P | 392                | 0.4  | 0.8  | 1.6   | 355               | C | J <sup>ao</sup>                 | Fe    |
| 185  | <i>Calathea ornata</i> Koern. var. <i>rosea-lineata</i>               | No             | Marantaceae              | M | 28                 | 2              | P | 392                | 0.4  | 0.9  | 1.8   | 355               | C | J <sup>ao</sup>                 | Fe    |
| 186a | <i>Calathea picturata</i> C.Koch. & Linden. var. <i>vandentheekii</i> | No             | Marantaceae              | M | 26                 | 2              | P | 392                | 0.4  | 0.8  | 1.5   | 355               | C | J <sup>ao</sup>                 | Fe    |

APPENDIX. (continued, the superscript letters refer to notes concerning this table)

| Entry numbers <sup>g</sup> | Species                                                                     | Voucher | Family         | Monocot or dicot | Ploidy level (x) | Life cycle type <sup>§</sup> | DNA amount             |         |         |         | Original ref. <sup>a</sup> | Present amount <sup>†</sup> | Standard species* <sup>b1</sup> | Method <sup>††</sup> |
|----------------------------|-----------------------------------------------------------------------------|---------|----------------|------------------|------------------|------------------------------|------------------------|---------|---------|---------|----------------------------|-----------------------------|---------------------------------|----------------------|
|                            |                                                                             |         |                |                  |                  |                              | 1C (Mbp <sup>5</sup> ) | 1C (pg) | 2C (pg) | 4C (pg) |                            |                             |                                 |                      |
| 186b                       | <i>Calathea picturata</i> C.Koch. & Linden. var. <i>argentea</i>            | No      | Marantaceae    | M                | 2                | P                            | 392                    | 0.4     | 0.8     | 1.6     | 355                        | C                           | J <sup>ao</sup>                 | Fe                   |
| 187                        | <i>Calathea princeps</i> Regel.                                             | No      | Marantaceae    | M                | 2                | P                            | 294                    | 0.3     | 0.6     | 1.3     | 355                        | C                           | J <sup>ao</sup>                 | Fe                   |
| 188                        | <i>Calathea undulata</i> Regel.                                             | No      | Marantaceae    | M                | 2                | P                            | 392                    | 0.4     | 0.8     | 1.6     | 355                        | C                           | J <sup>ao</sup>                 | Fe                   |
| 189                        | <i>Calathea zebrina</i> Lindl.                                              | No      | Marantaceae    | M                | 2                | P                            | 392                    | 0.4     | 0.7     | 1.4     | 355                        | C                           | J <sup>ao</sup>                 | Fe                   |
| 190                        | <i>Calycanthus chemonanthis</i> <sup>1</sup>                                | Yes     | Calycanthaceae | D                | — <sup>p</sup>   | P                            | 980                    | 1.0     | 2.0     | 3.9     | 341                        | O                           | B <sup>c</sup>                  | Fe                   |
| 191                        | <i>Cananga odorata</i> Hook.f. & Thomson                                    | Yes     | Annonaceae     | D                | 2                | P                            | 784                    | 0.8     | 1.6     | 3.1     | 341                        | O                           | B <sup>c</sup>                  | Fe                   |
| 192                        | <i>Canella winterana</i> (L.) Gaertner.                                     | Yes     | Canellaceae    | D                | — <sup>p</sup>   | P                            | 5,684                  | 5.8     | 11.7    | 23.3    | 341                        | O                           | B <sup>c</sup>                  | Fe                   |
| 193                        | <i>Carex blepharicarpa</i> Franch.                                          | Yes     | Cyperaceae     | M                | 30               | — <sup>u</sup>               | 490                    | 0.5     | 0.9     | 1.8     | 357                        | C <sup>ap</sup>             | J-198                           | Fe                   |
| 194                        | <i>Carex bostrychostigma</i> Maxim.                                         | Yes     | Cyperaceae     | M                | 46               | — <sup>u</sup>               | 588                    | 0.6     | 1.1     | 2.2     | 357                        | C <sup>ap</sup>             | J-198                           | Fe                   |
| 195                        | <i>Carex brownii</i> Tuckerm. <sup>h &amp; ap</sup>                         | Yes     | Cyperaceae     | M                | 72               | — <sup>u</sup>               | 196                    | 0.2     | 0.4     | 0.9     | 357                        | C <sup>ap</sup>             | J-198                           | Fe                   |
| 196                        | <i>Carex capillacea</i> Boott <sup>h &amp; ap</sup>                         | Yes     | Cyperaceae     | M                | 60-66            | — <sup>u</sup>               | 294                    | 0.3     | 0.5     | 1.0     | 357                        | C <sup>ap</sup>             | J-198                           | Fe                   |
| 197                        | <i>Carex chrysolepis</i> Franch. & Sav.                                     | Yes     | Cyperaceae     | M                | 28               | — <sup>u</sup>               | 392                    | 0.4     | 0.8     | 1.6     | 357                        | C <sup>ap</sup>             | J-198                           | Fe                   |
| 198                        | <i>Carex ciliatmarginata</i> Nakai                                          | Yes     | Cyperaceae     | M                | 12 <sup>o</sup>  | 2                            | 588                    | 0.6     | 1.1     | 2.3     | 377                        | O                           | J                               | Fe                   |
| 199                        | <i>Carex conica</i> Boott <sup>h &amp; ap</sup>                             | Yes     | Cyperaceae     | M                | 36               | — <sup>u</sup>               | 490                    | 0.5     | 0.9     | 1.8     | 357                        | C <sup>ap</sup>             | J-198                           | Fe                   |
| 200                        | <i>Carex curvifolia</i> <sup>1</sup>                                        | Yes     | Cyperaceae     | M                | 56               | — <sup>u</sup>               | 294                    | 0.3     | 0.7     | 1.4     | 357                        | C <sup>ap</sup>             | J-198                           | Fe                   |
| 201                        | <i>Carex dolichostachya</i> Hayata var. <i>glaberrima</i>                   | Yes     | Cyperaceae     | M                | 62-70            | — <sup>u</sup>               | 392                    | 0.4     | 0.8     | 1.6     | 357                        | C <sup>ap</sup>             | J-198                           | Fe                   |
| 202                        | <i>Carex foliosissima</i> F.Schmidt                                         | Yes     | Cyperaceae     | M                | 30               | — <sup>u</sup>               | 490                    | 0.5     | 1.0     | 2.1     | 357                        | C <sup>ap</sup>             | J-198                           | Fe                   |
| 203                        | <i>Carex humilis</i> <sup>1</sup> ssp. <i>lanceolata</i>                    | Yes     | Cyperaceae     | M                | 72               | 4 <sup>u</sup>               | 686                    | 0.7     | 1.5     | 2.9     | 357                        | C <sup>ap</sup>             | J-198                           | Fe                   |
| 204                        | <i>Carex ischnostachya</i> Steud.                                           | Yes     | Cyperaceae     | M                | 62               | — <sup>u</sup>               | 294                    | 0.3     | 0.6     | 1.1     | 357                        | C <sup>ap</sup>             | J-198                           | Fe                   |
| 205                        | <i>Carex kiotensis</i> Franch. & Sav.                                       | Yes     | Cyperaceae     | M                | 74               | — <sup>u</sup>               | 294                    | 0.3     | 0.6     | 1.2     | 357                        | C <sup>ap</sup>             | J-198                           | Fe                   |
| 206                        | <i>Carex kobomugi</i> Ohwi                                                  | Yes     | Cyperaceae     | M                | 88               | — <sup>u</sup>               | 196                    | 0.2     | 0.5     | 0.9     | 357                        | C <sup>ap</sup>             | J-198                           | Fe                   |
| 207                        | <i>Carex laticeps</i> C.B.Clark                                             | Yes     | Cyperaceae     | M                | 58               | — <sup>u</sup>               | 294                    | 0.3     | 0.7     | 1.3     | 357                        | C <sup>ap</sup>             | J-198                           | Fe                   |
| 208                        | <i>Carex makinoensis</i> <sup>1</sup>                                       | Yes     | Cyperaceae     | M                | 30               | — <sup>u</sup>               | 392                    | 0.4     | 0.8     | 1.6     | 357                        | C <sup>ap</sup>             | J-198                           | Fe                   |
| 209                        | <i>Carex maximowiczii</i> <sup>1</sup>                                      | Yes     | Cyperaceae     | M                | 68-74            | — <sup>u</sup>               | 294                    | 0.3     | 0.6     | 1.2     | 357                        | C <sup>ap</sup>             | J-198                           | Fe                   |
| 210a                       | <i>Carex morrowii</i> Boott var. <i>albomarginata</i>                       | Yes     | Cyperaceae     | M                | 30               | — <sup>u</sup>               | 490                    | 0.5     | 1.0     | 2.0     | 357                        | C <sup>ap</sup>             | J-198                           | Fe                   |
| 210b                       | <i>Carex morrowii</i> Boott var. <i>temnolepis</i>                          | Yes     | Cyperaceae     | M                | 38               | — <sup>u</sup>               | 490                    | 0.5     | 1.0     | 2.0     | 357                        | C <sup>ap</sup>             | J-198                           | Fe                   |
| 210c                       | <i>Carex morrowii</i> Boott                                                 | Yes     | Cyperaceae     | M                | 38               | — <sup>u</sup>               | 490                    | 0.5     | 1.0     | 2.0     | 357                        | C <sup>ap</sup>             | J-198                           | Fe                   |
| 211                        | <i>Carex nubigeri</i> <sup>1</sup> ssp. <i>albata</i> <sup>h &amp; ap</sup> | Yes     | Cyperaceae     | M                | 112              | 2 <sup>u</sup>               | 196                    | 0.2     | 0.3     | 0.6     | 357                        | C <sup>ap</sup>             | J-198                           | Fe                   |
| 212                        | <i>Carex oahuensis</i> Hillebr. ssp. <i>robusta</i>                         | Yes     | Cyperaceae     | M                | 62               | — <sup>u</sup>               | 294                    | 0.3     | 0.5     | 1.1     | 357                        | C <sup>ap</sup>             | J-198                           | Fe                   |
| 213                        | <i>Carex omiana</i> Franch. & Sav.                                          | Yes     | Cyperaceae     | M                | 48-58            | — <sup>u</sup>               | 294                    | 0.3     | 0.6     | 1.2     | 357                        | C <sup>ap</sup>             | J-198                           | Fe                   |
| 214                        | <i>Carex oxyandra</i> Kudo <sup>1 &amp; ap</sup>                            | Yes     | Cyperaceae     | M                | 20               | — <sup>u</sup>               | 392                    | 0.4     | 0.8     | 1.7     | 357                        | C <sup>ap</sup>             | J-198                           | Fe                   |
| 215                        | <i>Carex pachygena</i> Franch. & Sav.                                       | Yes     | Cyperaceae     | M                | 12               | 2                            | 686                    | 0.7     | 1.5     | 3.0     | 357                        | C <sup>ap</sup>             | J-198                           | Fe                   |
| 216                        | <i>Carex paxii</i> Kukenthal <sup>h &amp; ap</sup>                          | Yes     | Cyperaceae     | M                | 76               | 2 <sup>u</sup>               | 196                    | 0.2     | 0.3     | 0.6     | 357                        | C <sup>ap</sup>             | J-198                           | Fe                   |

|      |                                                                                   |     |                            |   |                |                |   |                    |     |     |      |     |                 |                                                |       |
|------|-----------------------------------------------------------------------------------|-----|----------------------------|---|----------------|----------------|---|--------------------|-----|-----|------|-----|-----------------|------------------------------------------------|-------|
| 217a | <i>Carex pisiformis</i> Boott ssp.<br><i>stenostachya</i> var. <i>ikegamiana</i>  | Yes | Cyperaceae                 | M | 58             | — <sup>u</sup> | P | 294                | 0.3 | 0.7 | 1.3  | 357 | C <sup>ap</sup> | J-198                                          | Fe    |
| 217b | <i>Carex pisiformis</i> Boott ssp.<br><i>stenostachya</i>                         | Yes | Cyperaceae                 | M | 58             | — <sup>u</sup> | P | 294                | 0.3 | 0.7 | 1.3  | 357 | C <sup>ap</sup> | J-198                                          | Fe    |
| 217c | <i>Carex pisiformis</i> Boott ssp.<br><i>alterniflora</i>                         | Yes | Cyperaceae                 | M | 60-84          | — <sup>u</sup> | P | 294                | 0.3 | 0.7 | 1.3  | 357 | C <sup>ap</sup> | J-198                                          | Fe    |
| 217d | <i>Carex pisiformis</i> Boott                                                     | Yes | Cyperaceae                 | M | 68             | — <sup>u</sup> | P | 392                | 0.4 | 0.7 | 1.4  | 357 | C <sup>ap</sup> | J-198                                          | Fe    |
| 217e | <i>Carex pisiformis</i> Boott ssp.<br><i>davalliana</i>                           | Yes | Cyperaceae                 | M | 76             | — <sup>u</sup> | P | 294                | 0.3 | 0.6 | 1.3  | 357 | C <sup>ap</sup> | J-198                                          | Fe    |
| 218  | <i>Carex pumila</i> <sup>1</sup>                                                  | Yes | Cyperaceae                 | M | 82             | — <sup>u</sup> | P | 294                | 0.3 | 0.6 | 1.1  | 357 | C <sup>ap</sup> | J-198                                          | Fe    |
| 219  | <i>Carex reinii</i> Franch. & Sav.                                                | Yes | Cyperaceae                 | M | 26             | — <sup>u</sup> | P | 490                | 0.5 | 1.0 | 2.0  | 357 | C <sup>ap</sup> | J-198                                          | Fe    |
| 220  | <i>Carex sendaica</i> Franch. ssp. <i>nakiri</i>                                  | Yes | Cyperaceae                 | M | 62             | — <sup>u</sup> | P | 294                | 0.3 | 0.7 | 1.3  | 357 | C <sup>ap</sup> | J-198                                          | Fe    |
| 221  | <i>Carex shimidzensis</i> Franch.                                                 | Yes | Cyperaceae                 | M | 68             | — <sup>u</sup> | P | 294                | 0.3 | 0.6 | 1.3  | 357 | C <sup>ap</sup> | J-198                                          | Fe    |
| 222  | <i>Carex siderosticta</i> Hance                                                   | Yes | Cyperaceae                 | M | 24             | 4              | P | 1,176              | 1.2 | 2.4 | 4.7  | 357 | C <sup>ap</sup> | J-198                                          | Fe    |
| 223  | <i>Carex thumbergii</i> Steud. <sup>h &amp; ap</sup>                              | Yes | Cyperaceae                 | M | 78-90          | — <sup>u</sup> | P | 294                | 0.3 | 0.6 | 1.2  | 357 | C <sup>ap</sup> | J-198                                          | Fe    |
| 224  | <i>Carex tristachya</i> Thunb. ssp.<br><i>pocilliformis</i> <sup>h &amp; ap</sup> | Yes | Cyperaceae                 | M | — <sup>n</sup> | — <sup>p</sup> | P | 294                | 0.3 | 0.6 | 1.2  | 357 | C <sup>ap</sup> | J-198                                          | Fe    |
| 225  | <i>Carya ilinoensis</i> C.Koch                                                    | No  | Juglandaceae               | D | 32°            | 2              | P | 784                | 0.8 | 1.7 | 3.3  | 348 | O               | G <sup>b2</sup>                                | FC:PI |
| 226  | <i>Cassia obtusifolia</i> L.                                                      | Yes | Leguminosae                | D | — <sup>n</sup> | — <sup>p</sup> | A | 980                | 1.0 | 2.0 | 4.0  | 375 | O               | F                                              | Fe    |
| 227a | <i>Cattleya bowringiana</i> O'Brien f.<br><i>alba</i>                             | No  | Orchidaceae                | M | 40, 42°        | — <sup>p</sup> | P | 2,440 <sup>1</sup> | 2.5 | 5.0 | 10.0 | 307 | O               | <i>Gallus</i> <sup>f</sup>                     | FC:PI |
| 227b | <i>Cattleya bowringiana</i> O'Brien var.<br><i>coerulea</i>                       | No  | Orchidaceae                | M | — <sup>n</sup> | — <sup>p</sup> | P | 2,445 <sup>1</sup> | 2.5 | 5.0 | 10.0 | 307 | O               | <i>Gallus</i> <sup>f</sup>                     | FC:PI |
| 228  | <i>Cattleya forbesii</i> Lindl.                                                   | No  | Orchidaceae                | M | 54-60°         | — <sup>p</sup> | P | 1,612 <sup>1</sup> | 1.7 | 3.3 | 6.6  | 307 | O               | <i>Gallus</i> <sup>f</sup>                     | FC:PI |
| 229a | <i>Cattleya walkeriana</i> Gardn.                                                 | No  | Orchidaceae                | M | 40°            | — <sup>p</sup> | P | 2,925 <sup>1</sup> | 3.0 | 6.0 | 12.0 | 307 | O               | <i>Gallus</i> <sup>f</sup>                     | FC:PI |
| 229b | <i>Cattleya walkeriana</i> Gardn. var.<br><i>coerulea</i> Hort.                   | No  | Orchidaceae                | M | 40°            | — <sup>p</sup> | P | 2,602 <sup>1</sup> | 2.7 | 5.3 | 10.6 | 307 | O               | <i>Gallus</i> <sup>f</sup>                     | FC:PI |
| 230a | <i>Cattleya walkeriana</i> Gardn. f. <i>alba</i><br>Hort. 'Limerick'              | No  | Orchidaceae                | M | c.60°          | — <sup>p</sup> | P | 3,984 <sup>1</sup> | 4.1 | 8.1 | 16.2 | 307 | O               | <i>Gallus</i> <sup>f</sup>                     | FC:PI |
| 230b | <i>Cattleya walkeriana</i> Gardn. f. <i>semi-</i><br><i>alba</i> Hort. 'Puanani'  | No  | Orchidaceae                | M | — <sup>n</sup> | — <sup>p</sup> | P | 3,577 <sup>1</sup> | 3.7 | 7.3 | 14.6 | 307 | O               | <i>Gallus</i> <sup>f</sup>                     | FC:PI |
| 231a | <i>Cattleya walkeriana</i> Gardn. f. <i>alba</i><br>Hort. 'Penditive'             | No  | Orchidaceae                | M | c.80°          | — <sup>p</sup> | P | 4,067 <sup>1</sup> | 4.3 | 8.6 | 17.2 | 307 | O               | <i>Gallus</i> <sup>f</sup>                     | FC:PI |
| 231b | <i>Cattleya walkeriana</i> Gardn. var.<br><i>coerulea</i> Hort. 'Chouju'          | No  | Orchidaceae                | M | — <sup>n</sup> | — <sup>p</sup> | P | 4,552 <sup>1</sup> | 4.7 | 9.3 | 18.6 | 307 | O               | <i>Gallus</i> <sup>f</sup>                     | FC:PI |
| 232  | <i>Cenchrus echinatus</i> <sup>1</sup>                                            | Yes | Gramineae                  | M | — <sup>n</sup> | — <sup>p</sup> | A | 2,548              | 2.6 | 5.1 | 10.2 | 375 | O               | F                                              | Fe    |
| 233  | <i>Chenopodium album</i> L.                                                       | Yes | Amaranthaceae <sup>k</sup> | D | 54             | 6              | A | 2,254              | 2.3 | 4.7 | 9.3  | 375 | O               | F                                              | Fe    |
| 234  | <i>Chloranthus officinalis</i> Mal.                                               | Yes | Chloranthaceae             | D | 30             | — <sup>p</sup> | P | 2,842              | 2.9 | 5.8 | 11.6 | 341 | O               | B <sup>c</sup>                                 | Fe    |
| 235  | <i>Cienfuegosia hitchcockii</i> (Ulbrich<br>ex Kearney) O.J.Blanchard             | No  | Malvaceae                  | D | 20°            | 2              | P | 1,176              | 1.2 | 2.3 | 4.6  | 349 | O               | G <sup>b2</sup>                                | FC:PI |
| 236  | <i>Citrus</i> cv. Tahiti lime                                                     | No  | Rutaceae                   | D | 27°            | 3              | P | 573                | 0.6 | 1.2 | 2.3  | 358 | O               | <i>Gallus</i> <sup>f</sup>                     | FC:PI |
| 237  | <i>Citrus aurantifolia</i> Swingle <sup>aq</sup>                                  | No  | Rutaceae                   | D | 18°            | 2              | P | 392                | 0.4 | 0.8 | 1.5  | 358 | O               | <i>Gallus</i> <sup>f</sup><br>236 <sup>f</sup> | FC:PI |

APPENDIX. (continued, the superscript letters refer to notes concerning this table)

| Entry number <sup>a</sup> | Species                                                 | Voucher | Family      | Monocot or dicot | Ploidy level (x) | 2n† | Life cycle type <sup>§</sup> | DNA amount             |         |         |         | Original ref. <sup>a</sup> | Present amount† | Standard species* <sup>b1</sup> | Method†† |
|---------------------------|---------------------------------------------------------|---------|-------------|------------------|------------------|-----|------------------------------|------------------------|---------|---------|---------|----------------------------|-----------------|---------------------------------|----------|
|                           |                                                         |         |             |                  |                  |     |                              | 1C (Mbp <sup>s</sup> ) | 1C (pg) | 2C (pg) | 4C (pg) |                            |                 |                                 |          |
| 238                       | <i>Citrus aurantium</i> L.                              | No      | Rutaceae    | D                | 2                | 18° | P                            | 392                    | 0.4     | 0.8     | 1.5     | 358                        | O               | <i>Gallus-236<sup>f</sup></i>   | FC:PI    |
| 239                       | <i>Citrus grandis</i> <sup>l &amp; aq</sup>             | No      | Rutaceae    | D                | 2                | 18° | P                            | 392                    | 0.4     | 0.8     | 1.6     | 358                        | O               | <i>Gallus-236<sup>f</sup></i>   | FC:PI    |
| 240                       | <i>Citrus limon</i> (L.) Burm. f. <sup>aq</sup>         | No      | Rutaceae    | D                | 2                | 18° | P                            | 392                    | 0.4     | 0.8     | 1.6     | 358                        | O               | <i>Gallus-236<sup>f</sup></i>   | FC:PI    |
| 241                       | <i>Citrus medica</i> L. <sup>aq</sup>                   | No      | Rutaceae    | D                | 2                | 18° | P                            | 392                    | 0.4     | 0.8     | 1.6     | 358                        | O               | <i>Gallus-236<sup>f</sup></i>   | FC:PI    |
| 242                       | <i>Citrus paradisi</i> Macfad. <sup>aq</sup>            | No      | Rutaceae    | D                | 2                | 18° | P                            | 392                    | 0.4     | 0.8     | 1.6     | 358                        | O               | <i>Gallus-236<sup>f</sup></i>   | FC:PI    |
| 243b                      | <i>Citrus reticulata</i> Blanco <sup>aq</sup>           | No      | Rutaceae    | D                | 2                | 18° | P                            | 392                    | 0.4     | 0.7     | 1.5     | 358                        | O               | <i>Gallus-236<sup>f</sup></i>   | FC:PI    |
| 244d                      | <i>Citrus sinensis</i> Osbeck                           | No      | Rutaceae    | D                | 2                | 18° | P                            | 392                    | 0.4     | 0.8     | 1.5     | 358                        | O               | <i>Gallus-236<sup>f</sup></i>   | FC:PI    |
| 245                       | <i>Cleisostoma subulatum</i> Bl.                        | No      | Orchidaceae | M                | —P               | 38° | P                            | 3,136 <sup>l</sup>     | 3.2     | 6.4     | 12.8    | 307                        | O               | <i>Gallus<sup>f</sup></i>       | FC:PI    |
| 246                       | <i>Coccothrinax fragrans</i> Burret                     | Yes     | Palmae      | M                | —P               | —n  | P                            | 6,370                  | 6.5     | 12.9    | 25.9    | 377                        | O               | B                               | Fe       |
| 247                       | <i>Cochlearia pyrenaica</i> DC.                         | —m      | Cruciferae  | D                | 2                | 12° | B-P                          | 392                    | 0.4     | 0.8     | 1.6     | 350                        | O               | B <sup>f</sup> & G <sup>e</sup> | Fe       |
| 248                       | <i>Cochlioda noezliana</i> Rolfe                        | Yes     | Orchidaceae | M                | —P               | —n  | P                            | 3,430                  | 3.5     | 6.9     | 13.9    | 377                        | O               | F                               | Fe       |
| 249                       | <i>Coelogyne pastulata</i> Pfitz.                       | No      | Orchidaceae | M                | —P               | —n  | P                            | 2,685 <sup>l</sup>     | 2.8     | 5.5     | 11.0    | 307                        | O               | <i>Gallus<sup>f</sup></i>       | FC:PI    |
| 250f                      | <i>Coffea arabica</i> L. <sup>h</sup>                   | No      | Rubiaceae   | D                | 4                | 44° | P                            | 1,176                  | 1.2     | 2.3     | 4.6     | 309                        | O               | <i>Gallus<sup>f</sup></i>       | FC:PI    |
| 250g                      | <i>Coffea arabica</i> L. <sup>h</sup>                   | No      | Rubiaceae   | D                | 4                | 44° | P                            | 1,372                  | 1.4     | 2.7     | 5.4     | 309                        | O               | <i>Gallus<sup>f</sup></i>       | FC:PI    |
| 251                       | <i>Coffea bertrandii</i> A.Cheval.                      | No      | Rubiaceae   | D                | 2                | 22° | P                            | 784                    | 0.8     | 1.7     | 3.3     | 309                        | O               | <i>Gallus<sup>f</sup></i>       | FC:PI    |
| 252a                      | <i>Coffea brevipes</i> Hiern. <sup>h</sup>              | No      | Rubiaceae   | D                | 2                | 22° | P                            | 686                    | 0.7     | 1.4     | 2.8     | 309                        | O               | <i>Gallus<sup>f</sup></i>       | FC:PI    |
| 252b                      | <i>Coffea brevipes</i> Hiern. <sup>h</sup>              | No      | Rubiaceae   | D                | 2                | 22° | P                            | 882                    | 0.9     | 1.7     | 3.4     | 309                        | O               | <i>Gallus<sup>f</sup></i>       | FC:PI    |
| 253b                      | <i>Coffea canephora</i> Pierre. ex Froehn. <sup>h</sup> | No      | Rubiaceae   | D                | 2                | 22° | P                            | 588                    | 0.6     | 1.2     | 2.4     | 309                        | O               | <i>Gallus<sup>f</sup></i>       | FC:PI    |
| 253c                      | <i>Coffea canephora</i> Pierre. ex Froehn. <sup>h</sup> | No      | Rubiaceae   | D                | 2                | 22° | P                            | 784                    | 0.8     | 1.6     | 3.2     | 309                        | O               | <i>Gallus<sup>f</sup></i>       | FC:PI    |
| 254a                      | <i>Coffea congensis</i> Froehn. <sup>h</sup>            | No      | Rubiaceae   | D                | 2                | 22° | P                            | 686                    | 0.7     | 1.4     | 2.8     | 309                        | O               | <i>Gallus<sup>f</sup></i>       | FC:PI    |
| 254b                      | <i>Coffea congensis</i> Froehn. <sup>h</sup>            | No      | Rubiaceae   | D                | 2                | 22° | P                            | 882                    | 0.9     | 1.8     | 3.6     | 309                        | O               | <i>Gallus<sup>f</sup></i>       | FC:PI    |
| 255b                      | <i>Coffea eugenioides</i> S.Moore. <sup>h</sup>         | No      | Rubiaceae   | D                | 2                | 22° | P                            | 686                    | 0.7     | 1.3     | 2.6     | 309                        | O               | <i>Gallus<sup>f</sup></i>       | FC:PI    |
| 255c                      | <i>Coffea eugenioides</i> S.Moore. <sup>h</sup>         | No      | Rubiaceae   | D                | 2                | 22° | P                            | 686                    | 0.7     | 1.4     | 2.8     | 309                        | O               | <i>Gallus<sup>f</sup></i>       | FC:PI    |
| 256                       | <i>Coffea jarafangensis</i> Leroy                       | No      | Rubiaceae   | D                | 2                | 22° | P                            | 686                    | 0.7     | 1.3     | 2.7     | 309                        | O               | <i>Gallus<sup>f</sup></i>       | FC:PI    |
| 257a                      | <i>Coffea humilis</i> A.Cheval. <sup>h</sup>            | No      | Rubiaceae   | D                | 2                | 22° | P                            | 686                    | 0.7     | 1.4     | 2.8     | 309                        | O               | <i>Gallus<sup>f</sup></i>       | FC:PI    |
| 257b                      | <i>Coffea humilis</i> A.Cheval. <sup>h</sup>            | No      | Rubiaceae   | D                | 2                | 22° | P                            | 882                    | 0.9     | 1.8     | 3.6     | 309                        | O               | <i>Gallus<sup>f</sup></i>       | FC:PI    |
| 258a                      | <i>Coffea liberica</i> L. <sup>h</sup>                  | No      | Rubiaceae   | D                | 2                | 22° | P                            | 686                    | 0.7     | 1.3     | 2.6     | 309                        | O               | <i>Gallus<sup>f</sup></i>       | FC:PI    |
| 258b                      | <i>Coffea liberica</i> L. <sup>h</sup>                  | No      | Rubiaceae   | D                | 2                | 22° | P                            | 980                    | 1.0     | 1.9     | 3.8     | 309                        | O               | <i>Gallus<sup>f</sup></i>       | FC:PI    |
| 258c                      | <i>Coffea liberica</i> var. <i>dewevrei</i> Lebrun      | —m      | Rubiaceae   | D                | —P               | —n  | P                            | 686                    | 0.7     | 1.4     | 2.8     | 325                        | O               | <i>Petunia<sup>f</sup></i>      | FC:PI    |

|      |                                                              |                |                         |   |                |                |     |                     |                   |                   |                    |                   |   |                             |         |
|------|--------------------------------------------------------------|----------------|-------------------------|---|----------------|----------------|-----|---------------------|-------------------|-------------------|--------------------|-------------------|---|-----------------------------|---------|
| 259  | <i>Coffea millotii</i> Leroy                                 | No             | Rubiaceae               | D | 22°            | 2              | P   | 882                 | 0.9               | 1.7               | 3.4                | 309               | O | <i>Gallus</i> <sup>f</sup>  | FC:PI   |
| 260a | <i>Coffea pseudozanguebariae</i><br>D.M.Bridson <sup>h</sup> | No             | Rubiaceae               | D | 22°            | 2              | P   | 490                 | 0.5               | 1.0               | 2.0                | 309               | O | <i>Gallus</i> <sup>f</sup>  | FC:PI   |
| 260b | <i>Coffea pseudozanguebariae</i><br>D.M.Bridson <sup>h</sup> | No             | Rubiaceae               | D | 22°            | 2              | P   | 686                 | 0.7               | 1.3               | 2.6                | 309               | O | <i>Gallus</i> <sup>f</sup>  | FC:PI   |
| 260c | <i>Coffea pseudozanguebariae</i><br>D.M.Bridson              | — <sup>m</sup> | Rubiaceae               | D | — <sup>n</sup> | — <sup>p</sup> | P   | 588                 | 0.6               | 1.1               | 2.3                | 325               | O | <i>Petunia</i> <sup>f</sup> | FC:PI   |
| 261a | <i>Coffea racemosa</i> <sup>h&amp;l</sup>                    | No             | Rubiaceae               | D | 22°            | 2              | P   | 490                 | 0.5               | 0.9               | 1.8                | 309               | O | <i>Gallus</i> <sup>f</sup>  | FC:PI   |
| 261b | <i>Coffea racemosa</i> <sup>h&amp;l</sup>                    | No             | Rubiaceae               | D | 22°            | 2              | P   | 588                 | 0.6               | 1.1               | 2.2                | 309               | O | <i>Gallus</i> <sup>f</sup>  | FC:PI   |
| 262  | <i>Coffea salvatrix</i> Swynn. & Philipson.                  | No             | Rubiaceae               | D | 22°            | 2              | P   | 784                 | 0.8               | 1.5               | 3.0                | 309               | O | <i>Gallus</i> <sup>f</sup>  | FC:PI   |
| 263a | <i>Coffea sessiliflora</i> D.M.Bridson <sup>h</sup>          | No             | Rubiaceae               | D | 22°            | 2              | P   | 392                 | 0.4               | 0.9               | 1.7                | 309               | O | <i>Gallus</i> <sup>f</sup>  | FC:PI   |
| 263b | <i>Coffea sessiliflora</i> D.M.Bridson <sup>h</sup>          | No             | Rubiaceae               | D | 22°            | 2              | P   | 588                 | 0.6               | 1.1               | 2.3                | 309               | O | <i>Gallus</i> <sup>f</sup>  | FC:PI   |
| 264a | <i>Coffea stenophylla</i> G.Don. <sup>h</sup>                | No             | Rubiaceae               | D | 22°            | 2              | P   | 588                 | 0.6               | 1.2               | 2.4                | 309               | O | <i>Gallus</i> <sup>f</sup>  | FC:PI   |
| 264b | <i>Coffea stenophylla</i> G.Don. <sup>h</sup>                | No             | Rubiaceae               | D | 22°            | 2              | P   | 784                 | 0.8               | 1.5               | 3.0                | 309               | O | <i>Gallus</i> <sup>f</sup>  | FC:PI   |
| 265  | <i>Convolvulus arvensis</i> L.                               | Yes            | Convolvulaceae          | D | 48             | — <sup>p</sup> | P   | 1,764               | 1.8               | 3.6               | 7.1                | 375               | O | F                           | Fe      |
| 266b | <i>Crepis foetida</i> L. ssp. <i>commutata</i>               | Yes            | Compositae <sup>l</sup> | D | 10             | 2              | A   | 1,931               | 2.0               | 3.9               | 7.9                | 361 <sup>as</sup> | O | G <sup>c</sup>              | Fe      |
| 266c | <i>Crepis foetida</i> L. ssp. <i>commutata</i>               | Yes            | Compositae <sup>l</sup> | D | 10             | 2              | A   | 1,940               | 2.0               | 4.0               | 7.9                | 361 <sup>as</sup> | O | <i>Glycine</i> <sup>e</sup> | FC:PI   |
| 266d | <i>Crepis foetida</i> L. ssp. <i>foetida</i>                 | Yes            | Compositae <sup>l</sup> | D | 10             | 2              | A   | 2,136               | 2.2               | 4.4               | 8.7                | 361 <sup>as</sup> | O | G <sup>c</sup>              | Fe      |
| 266e | <i>Crepis foetida</i> L. ssp. <i>foetida</i>                 | Yes            | Compositae <sup>l</sup> | D | 10             | 2              | A   | 2,185               | 2.2               | 4.5               | 8.9                | 361 <sup>as</sup> | O | <i>Glycine</i> <sup>e</sup> | FC:PI   |
| 266f | <i>Crepis foetida</i> L. ssp. <i>rhoeadifolia</i>            | Yes            | Compositae <sup>l</sup> | D | 10             | 2              | A   | 2,107               | 2.2               | 4.3               | 8.6                | 361 <sup>as</sup> | O | G <sup>c</sup>              | Fe      |
| 266g | <i>Crepis foetida</i> L. ssp. <i>rhoeadifolia</i>            | Yes            | Compositae <sup>l</sup> | D | 10             | 2              | A   | 2,127               | 2.2               | 4.3               | 8.7                | 361 <sup>as</sup> | O | <i>Glycine</i> <sup>e</sup> | FC:PI   |
| 267  | <i>Cymbidium sinense</i> (Jacks.) Willd                      | No             | Orchidaceae             | M | 40°            | — <sup>p</sup> | P   | 3,092 <sup>l</sup>  | 3.2               | 6.3               | 12.6               | 307               | O | <i>Gallus</i> <sup>f</sup>  | FC:PI   |
| 268  | <i>Cymbopetalum bailonii</i> R.E.Fr.                         | Yes            | Annonaceae              | D | 18             | 2              | P   | 784                 | 0.8               | 1.6               | 3.2                | 341               | O | B <sup>c</sup>              | Fe      |
| 269  | <i>Cymbopetalum brasiliense</i> (Vell.) & Benth.             | Yes            | Annonaceae              | D | 27             | — <sup>p</sup> | P   | 2,450               | 2.5               | 4.9               | 9.9                | 341               | O | B <sup>c</sup>              | Fe      |
| 270  | <i>Cynodon dactylon</i> (L.) Pers.                           | Yes            | Gramineae               | M | — <sup>n</sup> | — <sup>p</sup> | P   | 784                 | 0.8               | 1.6               | 3.2                | 375               | O | F                           | Fe      |
| 271  | <i>Cyperus esculentus</i> L.                                 | Yes            | Cyperaceae              | M | c.128          | — <sup>p</sup> | P   | 588                 | 0.6               | 1.2               | 2.4                | 375               | O | F                           | Fe      |
| 272  | <i>Cyperus iria</i> L.                                       | Yes            | Cyperaceae              | M | c.128          | — <sup>p</sup> | A   | 784                 | 0.8               | 1.6               | 3.2                | 375               | O | F                           | Fe      |
| 273  | <i>Cyperus rotundus</i> <sup>l</sup>                         | Yes            | Cyperaceae              | M | — <sup>n</sup> | — <sup>p</sup> | P   | 490                 | 0.5               | 0.9               | 1.8                | 375               | O | F                           | Fe      |
| 274  | <i>Cypripedium calceolus</i> L.                              | — <sup>m</sup> | Orchidaceae             | M | 20-22°         | — <sup>p</sup> | P   | 31,703              | 32.4              | 64.7              | 129.4              | 377               | O | B                           | Fe      |
| 275  | <i>Cypripedium henryi</i> Rolfe                              | — <sup>m</sup> | Orchidaceae             | M | — <sup>n</sup> | — <sup>p</sup> | P   | 38,024              | 38.8              | 77.7              | 155.3              | 377               | O | B                           | Fe      |
| 276  | <i>Cypripedium japonicum</i> Thunb. var. <i>formosanum</i>   | — <sup>m</sup> | Orchidaceae             | M | 20°            | — <sup>p</sup> | P   | 31,360              | 32.0              | 64.1              | 128.1              | 377               | O | B                           | Fe      |
| 277  | <i>Cypripedium macranthos</i> Sw.                            | — <sup>m</sup> | Orchidaceae             | M | 20°            | — <sup>p</sup> | P   | 36,652              | 37.4              | 74.8              | 149.6              | 377               | O | B                           | Fe      |
| 278  | <i>Cypripedium molle</i> Lindl.                              | Yes            | Orchidaceae             | M | 20             | 2              | P   | 4,052               | 4.1               | 8.3               | 16.5               | 377               | O | B                           | Fe      |
| 279f | <i>Dactylis glomerata</i> L.                                 | Yes            | Gramineae <sup>l</sup>  | M | 14°            | 2              | P   | 1,666 <sup>ac</sup> | 1.7 <sup>ac</sup> | 3.5 <sup>ac</sup> | 6.9 <sup>ac</sup>  | 314               | O | <i>Petunia</i> <sup>f</sup> | FC:DAPI |
| 280d | <i>Dactylis glomerata</i> L.                                 | Yes            | Gramineae               | M | 28             | 4              | P   | 4,038               | 4.1               | 8.2               | 16.5               | 371               | O | F <sup>c</sup>              | FC:PI   |
| 280e | <i>Dactylis glomerata</i> L.                                 | Yes            | Gramineae               | M | 28             | 4              | P   | 4,067               | 4.2               | 8.3               | 16.6               | 371               | O | B <sup>c</sup>              | Fe      |
| 280f | <i>Dactylis glomerata</i> L.                                 | Yes            | Gramineae <sup>l</sup>  | M | 28°            | 4              | P   | 3,136 <sup>ac</sup> | 3.2 <sup>ac</sup> | 6.4 <sup>ac</sup> | 12.8 <sup>ac</sup> | 314               | O | <i>Petunia</i> <sup>f</sup> | FC:DAPI |
| 281  | <i>Dactylis glomerata</i> L.                                 | Yes            | Gramineae <sup>l</sup>  | M | 42°            | 6              | P   | 4,312 <sup>ac</sup> | 4.4 <sup>ac</sup> | 8.8 <sup>ac</sup> | 17.6 <sup>ac</sup> | 314               | O | <i>Petunia</i> <sup>f</sup> | FC:DAPI |
| 282  | <i>Daenonopsis aegyptium</i> <sup>l</sup>                    | Yes            | Gramineae               | M | — <sup>n</sup> | — <sup>p</sup> | A-P | 1,862               | 1.9               | 3.8               | 7.5                | 375               | O | F                           | Fe      |
| 283  | <i>Daenonopsis angustifolius</i> <sup>l</sup>                | Yes            | Palmae                  | M | — <sup>n</sup> | — <sup>p</sup> | P   | 1,764               | 1.8               | 3.7               | 7.3                | 377               | O | B                           | Fe      |

APPENDIX. (continued, the superscript letters refer to notes concerning this table)

| Entry number <sup>g</sup> | Species                                                                                    | Voucher | Family      | Monocot or dicot | Ploidy level (x) | Life cycle type <sup>h</sup> | DNA amount             |                  |                  |                  | Original ref. <sup>a</sup> | Present amount <sup>b</sup> | Standard species* <sup>b1</sup> | Method <sup>††</sup> |
|---------------------------|--------------------------------------------------------------------------------------------|---------|-------------|------------------|------------------|------------------------------|------------------------|------------------|------------------|------------------|----------------------------|-----------------------------|---------------------------------|----------------------|
|                           |                                                                                            |         |             |                  |                  |                              | 1C (Mbp <sup>s</sup> ) | 1C (pg)          | 2C (pg)          | 4C (pg)          |                            |                             |                                 |                      |
| 284b                      | <i>Dasyphyllum villosum</i> (L.) P.<br>Candargy (= <i>Haynaldia villosa</i> ) <sup>h</sup> | Yes     | Gramineae   | M                | 2                | A                            | 4,704                  | 4.8              | 9.6              | 19.1             | 310 <sup>aa</sup>          | O                           | C <sup>c</sup>                  | Fe                   |
| 284c                      | <i>Dasyphyllum villosum</i> (L.) P.<br>Candargy (= <i>Haynaldia villosa</i> ) <sup>h</sup> | Yes     | Gramineae   | M                | 2                | A                            | 5,782                  | 5.9              | 11.9             | 23.7             | 310 <sup>aa</sup>          | O                           | C <sup>c</sup>                  | Fe                   |
| 285                       | <i>Dendrobium affine</i> (Deane) Steud.                                                    | No      | Orchidaceae | M                | 2                | P                            | 911 <sup>1</sup>       | 1.0              | 1.9              | 3.8              | 307                        | O                           | <i>Gallus</i> <sup>f</sup>      | FC:PI                |
| 286                       | <i>Dendrobium antennatum</i> Lindl.                                                        | No      | Orchidaceae | M                | 2                | P                            | 1,357 <sup>1</sup>     | 1.4              | 2.8              | 5.6              | 307                        | O                           | <i>Gallus</i> <sup>f</sup>      | FC:PI                |
| 287                       | <i>Dendrobium atroviolaceum</i> Rolfe                                                      | No      | Orchidaceae | M                | 2                | P                            | 1,259 <sup>1</sup>     | 1.3              | 2.6              | 5.2              | 307                        | O                           | <i>Gallus</i> <sup>f</sup>      | FC:PI                |
| 288                       | <i>Dendrobium bellatulum</i> Rolfe                                                         | No      | Orchidaceae | M                | 2                | P                            | 1,308 <sup>1</sup>     | 1.3              | 2.6              | 5.2              | 307                        | O                           | <i>Gallus</i> <sup>f</sup>      | FC:PI                |
| 289                       | <i>Dendrobium bicaudatum</i> Reinw.                                                        | No      | Orchidaceae | M                | 2                | P                            | 1,181 <sup>1</sup>     | 1.2              | 2.4              | 4.8              | 307                        | O                           | <i>Gallus</i> <sup>f</sup>      | FC:PI                |
| 290                       | <i>Dendrobium bigibbum</i> Lindl.                                                          | No      | Orchidaceae | M                | 2                | P                            | 877 <sup>1</sup>       | 0.9              | 1.8              | 3.6              | 307                        | O                           | <i>Gallus</i> <sup>f</sup>      | FC:PI                |
| 291                       | <i>Dendrobium bracteosum</i> Rehb.f.                                                       | No      | Orchidaceae | M                | 2                | P                            | 1,729 <sup>1</sup>     | 1.8              | 3.5              | 7.0              | 307                        | O                           | <i>Gallus</i> <sup>f</sup>      | FC:PI                |
| 292                       | <i>Dendrobium bullianum</i> Rehb.f.                                                        | No      | Orchidaceae | M                | 2                | P                            | 1,764 <sup>1</sup>     | 1.8              | 3.6              | 7.2              | 307                        | O                           | <i>Gallus</i> <sup>f</sup>      | FC:PI                |
| 293                       | <i>Dendrobium canaliculatum</i> R.Br.                                                      | No      | Orchidaceae | M                | 2                | P                            | 1,328 <sup>1</sup>     | 1.4              | 2.7              | 5.4              | 307                        | O                           | <i>Gallus</i> <sup>f</sup>      | FC:PI                |
| 294                       | <i>Dendrobium conanthum</i> Schltr.                                                        | No      | Orchidaceae | M                | 2                | P                            | 1,103 <sup>1</sup>     | 1.2              | 2.3              | 4.6              | 307                        | O                           | <i>Gallus</i> <sup>f</sup>      | FC:PI                |
| 295                       | <i>Dendrobium cruentum</i> Rehb.f.                                                         | No      | Orchidaceae | M                | 2                | P                            | 749 <sup>1</sup>       | 0.8              | 1.5              | 3.0              | 307                        | O                           | <i>Gallus</i> <sup>f</sup>      | FC:PI                |
| 296                       | <i>Dendrobium crumenatum</i> Sw.                                                           | No      | Orchidaceae | M                | 2                | P                            | 1,279 <sup>1</sup>     | 1.3              | 2.6              | 5.2              | 307                        | O                           | <i>Gallus</i> <sup>f</sup>      | FC:PI                |
| 297                       | <i>Dendrobium discolor</i> Lindl.                                                          | No      | Orchidaceae | M                | 2                | P                            | 828 <sup>1</sup>       | 0.9              | 1.7              | 3.4              | 307                        | O                           | <i>Gallus</i> <sup>f</sup>      | FC:PI                |
| 298                       | <i>Dendrobium forbesii</i> Ridl.                                                           | No      | Orchidaceae | M                | 2                | P                            | 936 <sup>1</sup>       | 1.0              | 1.9              | 3.8              | 307                        | O                           | <i>Gallus</i> <sup>f</sup>      | FC:PI                |
| 299                       | <i>Dendrobium formosum</i> Roxb. ex Lindl.                                                 | No      | Orchidaceae | M                | 2                | P                            | 848 <sup>1</sup>       | 0.9              | 1.7              | 3.4              | 307                        | O                           | <i>Gallus</i> <sup>f</sup>      | FC:PI                |
| 300a                      | <i>Dendrobium gouldii</i> Rehb.f.                                                          | No      | Orchidaceae | M                | 2                | P                            | 1,024 <sup>1</sup>     | 1.1              | 2.1              | 4.2              | 307                        | O                           | <i>Gallus</i> <sup>f</sup>      | FC:PI                |
| 300b                      | <i>Dendrobium gouldii</i> Rehb.f.                                                          | No      | Orchidaceae | M                | 2                | P                            | 1,078                  | 1.1              | 2.1              | 4.2              | 362                        | O                           | <i>Gallus</i> <sup>f</sup>      | FC:PI                |
| 301                       | <i>Dendrobium helix</i> Cribb                                                              | No      | Orchidaceae | M                | 2                | P                            | 1,136 <sup>1</sup>     | 1.2              | 2.3              | 4.6              | 307                        | O                           | <i>Gallus</i> <sup>f</sup>      | FC:PI                |
| 302                       | <i>Dendrobium lastanthera</i> J.J.Sm.                                                      | No      | Orchidaceae | M                | 2                | P                            | 1,039 <sup>1</sup>     | 1.1              | 2.1              | 4.2              | 307                        | O                           | <i>Gallus</i> <sup>f</sup>      | FC:PI                |
| 303                       | <i>Dendrobium lindleyi</i> Steud.                                                          | No      | Orchidaceae | M                | 2                | P                            | 1,176 <sup>1</sup>     | 1.2              | 2.4              | 4.8              | 307                        | O                           | <i>Gallus</i> <sup>f</sup>      | FC:PI                |
| 304                       | <i>Dendrobium macrophyllum</i> A.Rich.                                                     | No      | Orchidaceae | M                | 2                | P                            | 921 <sup>1</sup>       | 1.0              | 1.9              | 3.8              | 307                        | O                           | <i>Gallus</i> <sup>f</sup>      | FC:PI                |
| 305b                      | <i>Dendrobium moschatum</i> (Buch.-Ham.) Sw.                                               | No      | Orchidaceae | M                | 2                | P                            | 1,705 <sup>1</sup>     | 1.8 <sup>z</sup> | 3.5 <sup>z</sup> | 7.0 <sup>z</sup> | 307                        | O                           | <i>Gallus</i> <sup>f</sup>      | FC:PI                |
| 305c                      | <i>Dendrobium moschatum</i> (Buch.-Ham.) Sw.                                               | No      | Orchidaceae | M                | 2                | P                            | 1,666                  | 1.7 <sup>z</sup> | 3.5 <sup>z</sup> | 7.0 <sup>z</sup> | 362                        | O                           | <i>Gallus</i> <sup>f</sup>      | FC:PI                |
| 306                       | <i>Dendrobium parishii</i> Rehb.f.                                                         | No      | Orchidaceae | M                | 2                | P                            | 1,181 <sup>1</sup>     | 1.2              | 2.4              | 4.8              | 307                        | O                           | <i>Gallus</i> <sup>f</sup>      | FC:PI                |
| 307a                      | <i>Dendrobium phalaenopsis</i> Fitzg.                                                      | No      | Orchidaceae | M                | 2                | P                            | 970 <sup>1</sup>       | 1.0              | 2.0              | 4.0              | 307                        | O                           | <i>Gallus</i> <sup>f</sup>      | FC:PI                |
| 307b                      | <i>Dendrobium phalaenopsis</i> Fitzg. var. <i>compactum</i>                                | No      | Orchidaceae | M                | 2                | P                            | 1,176                  | 1.2              | 2.4              | 4.7              | 362                        | O                           | <i>Gallus</i> <sup>f</sup>      | FC:PI                |
| 308                       | <i>Dendrobium polysema</i> Schltr.                                                         | No      | Orchidaceae | M                | 2                | P                            | 1,485 <sup>1</sup>     | 1.5              | 3.0              | 6.0              | 307                        | O                           | <i>Gallus</i> <sup>f</sup>      | FC:PI                |
| 309                       | <i>Dendrobium pulchellum</i> Roxb. ex Lindl.                                               | No      | Orchidaceae | M                | 2                | P                            | 1,558 <sup>1</sup>     | 1.6              | 3.2              | 6.4              | 307                        | O                           | <i>Gallus</i> <sup>f</sup>      | FC:PI                |
| 310                       | <i>Dendrobium rhodostictum</i> F.Muell. & Kranzl.                                          | No      | Orchidaceae | M                | 2                | P                            | 1,440 <sup>1</sup>     | 1.5              | 2.9              | 5.8              | 307                        | O                           | <i>Gallus</i> <sup>f</sup>      | FC:PI                |

|      |                                                                   |     |                        |   |                |                |     |                      |                    |                    |                    |                   |   |                                 |       |
|------|-------------------------------------------------------------------|-----|------------------------|---|----------------|----------------|-----|----------------------|--------------------|--------------------|--------------------|-------------------|---|---------------------------------|-------|
| 311  | <i>Dendrobium samoense</i> Cribb                                  | No  | Orchidaceae            | M | 38°            | 2              | P   | 1,984 <sup>1</sup>   | 2.1                | 4.1                | 8.2                | 307               | O | <i>Gallus</i> <sup>f</sup>      | FC:PI |
| 312  | <i>Dendrobium schulleri</i> J.J.Sm.                               | No  | Orchidaceae            | M | 38°            | 2              | P   | 961 <sup>1</sup>     | 1.0                | 2.0                | 4.0                | 307               | O | <i>Gallus</i> <sup>f</sup>      | FC:PI |
| 313  | <i>Dendrobium signatum</i> Rehb.f.                                | No  | Orchidaceae            | M | 38°            | 2              | P   | 1,430 <sup>1</sup>   | 1.5                | 2.9                | 5.8                | 307               | O | <i>Gallus</i> <sup>f</sup>      | FC:PI |
| 314a | <i>Dendrobium smilliteae</i> F.Muell.                             | No  | Orchidaceae            | M | 38°            | 2              | P   | 1,544 <sup>1</sup>   | 1.6                | 3.2                | 6.4                | 307               | O | <i>Gallus</i> <sup>f</sup>      | FC:PI |
| 314b | <i>Dendrobium smilliteae</i> F.Muell.                             | No  | Orchidaceae            | M | 38°            | 2              | P   | 1,568                | 1.6                | 3.2                | 6.3                | 362               | O | <i>Gallus</i> <sup>f</sup>      | FC:PI |
| 315  | <i>Dendrobium spectabile</i> (Bl.) Miq.                           | No  | Orchidaceae            | M | 38°            | 2              | P   | 2,073 <sup>1</sup>   | 2.1                | 4.2                | 8.4                | 307               | O | <i>Gallus</i> <sup>f</sup>      | FC:PI |
| 316  | <i>Dendrobium stratiotes</i> Rehb.f.                              | No  | Orchidaceae            | M | 38°            | 2              | P   | 1,641 <sup>1</sup>   | 1.7                | 3.4                | 6.8                | 307               | O | <i>Gallus</i> <sup>f</sup>      | FC:PI |
| 317  | <i>Dendrobium streblocerus</i> Rehb.f.                            | No  | Orchidaceae            | M | 38°            | 2              | P   | 1,828 <sup>1</sup>   | 1.9                | 3.7                | 7.4                | 307               | O | <i>Gallus</i> <sup>f</sup>      | FC:PI |
| 318  | <i>Dendrobium strepsicerus</i> J.J.Sm.                            | No  | Orchidaceae            | M | 38°            | 2              | P   | 1,431 <sup>1</sup>   | 1.5                | 2.9                | 5.8                | 307               | O | <i>Gallus</i> <sup>f</sup>      | FC:PI |
| 319  | <i>Dendrobium tangerinum</i> Cribb                                | No  | Orchidaceae            | M | 38°            | 2              | P   | 1,073 <sup>1</sup>   | 1.1                | 2.2                | 4.4                | 307               | O | <i>Gallus</i> <sup>f</sup>      | FC:PI |
| 320  | <i>Dendrobium taurinum</i> J.J.Sm.                                | No  | Orchidaceae            | M | 38°            | 2              | P   | 940 <sup>1</sup>     | 1.0                | 1.9                | 3.8                | 307               | O | <i>Gallus</i> <sup>f</sup>      | FC:PI |
| 321  | <i>Dendrobium violaceoflavens</i> Thomson                         | No  | Orchidaceae            | M | 38°            | 2              | P   | 1,318 <sup>1</sup>   | 1.4                | 2.7                | 5.4                | 307               | O | <i>Gallus</i> <sup>f</sup>      | FC:PI |
| 322  | <i>Digitaria ascendens</i> Rendle.                                | Yes | Gramineae              | M | — <sup>n</sup> | — <sup>p</sup> | A-P | 1,470                | 1.5                | 3.0                | 6.0                | 375               | O | F                               | Fe    |
| 323  | <i>Digitaria sanguinalis</i> (L.) Scop.                           | Yes | Gramineae              | M | 54             | 6              | A   | 1,176                | 1.2                | 2.4                | 4.8                | 375               | O | F                               | Fe    |
| 324  | <i>Doritis pulcherrima</i> Lindl.                                 | No  | Orchidaceae            | M | 38°            | — <sup>p</sup> | P   | 4,532 <sup>1</sup>   | 4.7                | 9.3                | 18.6               | 307               | O | <i>Gallus</i> <sup>f</sup>      | FC:PI |
| 325  | <i>Dypsis lutescens</i> (H. Wendl.) H.Beentje & J.Dransfeld       | Yes | Palmae                 | M | — <sup>n</sup> | — <sup>p</sup> | P   | 1,470                | 1.5                | 3.1                | 6.1                | 377               | O | B                               | Fe    |
| 326  | <i>Echinochloa colonum</i> (L.) Link.                             | Yes | Gramineae              | M | — <sup>n</sup> | — <sup>p</sup> | A   | 1,372                | 1.4                | 2.7                | 5.4                | 375               | O | F                               | Fe    |
| 327  | <i>Eclipta prostrata</i> (L.) Mant.                               | Yes | Compositae             | D | 22             | 2              | A-P | 1,568                | 1.6                | 3.1                | 6.2                | 375               | O | F                               | Fe    |
| 328  | <i>Elymus abolinii</i> (Drob.) Tzvelev                            | No  | Gramineae <sup>1</sup> | M | 28             | 4              | P   | 9,212                | 9.4                | 18.7               | 37.4               | 343 <sup>al</sup> | O | A <sup>c</sup> & F <sup>c</sup> | FC:PI |
| 329  | <i>Elymus atavicus</i> (Drob.) A.Löve                             | No  | Gramineae <sup>1</sup> | M | 42             | 6              | P   | 14,896               | 15.2               | 30.3               | 60.6               | 343 <sup>al</sup> | O | A <sup>c</sup> & F <sup>c</sup> | FC:PI |
| 330b | <i>Elymus canadensis</i> L.                                       | No  | Gramineae <sup>1</sup> | M | 28             | 4              | P   | 10,388               | 10.6               | 21.1               | 42.2               | 343 <sup>al</sup> | O | A <sup>c</sup> & F <sup>c</sup> | FC:PI |
| 331  | <i>Elymus caninus</i> L. <sup>1</sup>                             | No  | Gramineae <sup>1</sup> | M | 28             | 4              | P   | 8,428                | 8.6                | 17.1               | 34.2               | 343 <sup>al</sup> | O | A <sup>c</sup> & F <sup>c</sup> | FC:PI |
| 332  | <i>Elymus ciliaris</i> (Trin.) Tzvelev                            | No  | Gramineae <sup>1</sup> | M | 28             | 4              | P   | 8,526                | 8.7                | 17.3               | 34.7               | 343 <sup>al</sup> | O | A <sup>c</sup> & F <sup>c</sup> | FC:PI |
| 333  | <i>Elymus dahuricus</i> Turcz ex Griseb. <sup>1</sup>             | No  | Gramineae <sup>1</sup> | M | 42             | 6              | P   | 12,936               | 13.2               | 26.4               | 52.9               | 343 <sup>al</sup> | O | A <sup>c</sup> & F <sup>c</sup> | FC:PI |
| 334  | <i>Elymus glaucus</i> Buckley <sup>1</sup>                        | No  | Gramineae <sup>1</sup> | M | 28             | 4              | P   | 9,114                | 9.3                | 18.6               | 37.2               | 343 <sup>al</sup> | O | A <sup>c</sup> & F <sup>c</sup> | FC:PI |
| 335  | <i>Elymus lanceolatus</i> (Schribner & Smith) Gould <sup>1</sup>  | No  | Gramineae <sup>1</sup> | M | 28             | 4              | P   | 8,232                | 8.4                | 16.9               | 33.7               | 343 <sup>al</sup> | O | A <sup>c</sup> & F <sup>c</sup> | FC:PI |
| 336  | <i>Elymus mutabilis</i> (Drob.) Tzvelev <sup>1</sup>              | No  | Gramineae <sup>1</sup> | M | 28             | 4              | P   | 8,526                | 8.7                | 17.4               | 34.8               | 343 <sup>al</sup> | O | A <sup>c</sup> & F <sup>c</sup> | FC:PI |
| 337  | <i>Elymus sibiricus</i> L. <sup>1</sup>                           | No  | Gramineae <sup>1</sup> | M | — <sup>n</sup> | — <sup>p</sup> | P   | 8,134                | 8.3                | 16.6               | 33.2               | 343 <sup>al</sup> | O | A <sup>c</sup> & F <sup>c</sup> | FC:PI |
| 338  | <i>Elymus trachycaulus</i> (Link) Gould ex Shimmers <sup>1</sup>  | No  | Gramineae <sup>1</sup> | M | 28             | 4              | P   | 9,408                | 9.6                | 19.1               | 38.3               | 343 <sup>al</sup> | O | A <sup>c</sup> & F <sup>c</sup> | FC:PI |
| 339  | <i>Epidendrum steinbachii</i> Ames                                | No  | Orchidaceae            | M | — <sup>n</sup> | — <sup>p</sup> | P   | 1,407 <sup>1</sup>   | 1.5                | 2.9                | 5.8                | 307               | O | <i>Gallus</i> <sup>f</sup>      | FC:PI |
| 340  | <i>Epilobium ciliatum</i> Rafin.                                  | Yes | Onagraceae             | D | 36             | 2              | P   | 490                  | 0.5                | 1.1                | 2.1                | 375               | O | F                               | Fe    |
| 341  | <i>Epilobium tetragonum</i> <sup>1</sup>                          | Yes | Onagraceae             | D | 36             | 2              | P   | 588                  | 0.6                | 1.2                | 2.3                | 375               | O | F                               | Fe    |
| 342b | <i>Eragrostis tef</i> (Zucc.) Trotter cv. Trotterian <sup>1</sup> | No  | Gramineae              | M | 40°            | 4              | A   | 784 <sup>1</sup>     | 0.8                | 1.5                | 3.0                | 332 <sup>af</sup> | O | <i>Lycopers</i> . <sup>c</sup>  | FC:PI |
| 343  | <i>Erianthus arundinaceus</i> <sup>1</sup>                        | No  | Gramineae              | M | 60             | 6              | P   | 3,528                | 3.6                | 7.3                | 14.5               | 342               | O | G <sup>c</sup>                  | FC:EB |
| 344  | <i>Erycina diaphana</i> Schlr.                                    | Yes | Orchidaceae            | M | 56°            | — <sup>p</sup> | P   | 1,862                | 1.9                | 3.8                | 7.7                | 377               | O | F                               | Fe    |
| 345  | <i>Eschscholzia californica</i> Cham.                             | No  | Papaveraceae           | D | 12°            | 2              | A   | 1,078                | 1.1                | 2.2                | 4.5                | 373               | O | G <sup>b2</sup>                 | FC:PI |
| 346  | <i>Euphorbia globosa</i> Sims                                     | No  | Euphorbiaceae          | D | 20             | 2              | P   | 9,212 <sup>as</sup>  | 9.4 <sup>as</sup>  | 18.7 <sup>as</sup> | 37.4 <sup>as</sup> | 333               | O | B                               | Fe    |
| 347  | <i>Euphorbia hirta</i> L.                                         | Yes | Euphorbiaceae          | D | — <sup>n</sup> | — <sup>p</sup> | A   | 686                  | 0.7                | 1.3                | 2.6                | 375               | O | F                               | Fe    |
| 348  | <i>Euphorbia meloformis</i> Ait.                                  | No  | Euphorbiaceae          | D | 20             | 2              | P   | 14,014 <sup>as</sup> | 14.3 <sup>as</sup> | 28.6 <sup>as</sup> | 57.2 <sup>as</sup> | 333               | O | B                               | Fe    |

APPENDIX. (continued, the superscript letters refer to notes concerning this table)

| Entry number <sup>g</sup> | Species                                                                            | Voucher | Family        | Monocot or dicot | Ploidy level (x)    | Life cycle type <sup>h</sup> | DNA amount             |                    |                    |                    | Original ref. <sup>a</sup> | Present amount <sup>†</sup> | Standard species* <sup>b1</sup> | Method <sup>††</sup> |    |
|---------------------------|------------------------------------------------------------------------------------|---------|---------------|------------------|---------------------|------------------------------|------------------------|--------------------|--------------------|--------------------|----------------------------|-----------------------------|---------------------------------|----------------------|----|
|                           |                                                                                    |         |               |                  |                     |                              | 1C (Mbp <sup>5</sup> ) | 1C (pg)            | 2C (pg)            | 4C (pg)            |                            |                             |                                 |                      |    |
| 349                       | <i>Euphorbia nesemannii</i> R.A.Dyer                                               | No      | Euphorbiaceae | D                | 2                   | P                            | 13,132 <sup>ag</sup>   | 13.4 <sup>ag</sup> | 26.9 <sup>ag</sup> | 53.7 <sup>ag</sup> | 333                        | O                           | B                               | Fe                   |    |
| 350                       | <i>Euphorbia obesa</i> Hook.f.                                                     | No      | Euphorbiaceae | D                | 2                   | P                            | 13,034 <sup>ag</sup>   | 13.3 <sup>ag</sup> | 26.5 <sup>ag</sup> | 53.0 <sup>ag</sup> | 333                        | O                           | B                               | Fe                   |    |
| 351                       | <i>Euphorbia pentagona</i> Haw.                                                    | No      | Euphorbiaceae | D                | 2                   | P                            | 9,114 <sup>ag</sup>    | 9.3 <sup>ag</sup>  | 18.5 <sup>ag</sup> | 37.0 <sup>ag</sup> | 333                        | O                           | B                               | Fe                   |    |
| 352                       | <i>Euphorbia polygona</i> Haw.                                                     | No      | Euphorbiaceae | D                | 2                   | P                            | 14,112 <sup>ag</sup>   | 14.4 <sup>ag</sup> | 28.7 <sup>ag</sup> | 57.4 <sup>ag</sup> | 333                        | O                           | B                               | Fe                   |    |
| 353                       | <i>Euphorbia pugniformis</i> Boiss.                                                | No      | Euphorbiaceae | D                | 2                   | P                            | 9,212 <sup>ag</sup>    | 9.4 <sup>ag</sup>  | 18.8 <sup>ag</sup> | 37.6 <sup>ag</sup> | 333                        | O                           | B                               | Fe                   |    |
| 354                       | <i>Euphorbia pulcherrima</i> Willd ex Klotzsch                                     | No      | Euphorbiaceae | D                | 4                   | P                            | 1,666                  | 1.7                | 3.3                | 6.6                | 373                        | O                           | G <sup>b2</sup>                 | FC:PI                |    |
| 355                       | <i>Euphorbia valida</i> N.E.Br.                                                    | No      | Euphorbiaceae | D                | 2                   | P                            | 13,916 <sup>ag</sup>   | 14.2 <sup>ag</sup> | 28.3 <sup>ag</sup> | 56.6 <sup>ag</sup> | 333                        | O                           | B                               | Fe                   |    |
| 356                       | <i>Eupomatia benettii</i> F.Muell.                                                 | Yes     | Eupomatiaceae | D                | — <sup>p</sup>      | P                            | 1,078                  | 1.1                | 2.2                | 4.3                | 341                        | O                           | B <sup>c</sup>                  | Fe                   |    |
| 357                       | <i>Eupomatia laurina</i> R.Br.                                                     | Yes     | Eupomatiaceae | D                | — <sup>p</sup>      | P                            | 1,176                  | 1.2                | 2.4                | 4.9                | 341                        | O                           | B <sup>c</sup>                  | Fe                   |    |
| 358                       | <i>Eustoma grandiflorum</i> (Griesbach) Schinners cv. Hakusen                      | No      | Gentianaceae  | D                | 72 <sup>o</sup>     | A-B                          | 1,568 <sup>ab</sup>    | 1.6 <sup>ab</sup>  | 3.3 <sup>ab</sup>  | 6.5 <sup>ab</sup>  | 311                        | O                           | H <sup>c</sup>                  | FC:PI                |    |
| 359                       | <i>Fragaria moschata</i> Duchesne                                                  | Yes     | Rosaceae      | D                | 42                  | P                            | 686                    | 0.3                | 0.7                | 1.4                | 339                        | O                           | <i>Gallus</i> <sup>f</sup>      | FC:PI                |    |
| 360                       | <i>Fragaria virginiana</i> Duchesne                                                | Yes     | Rosaceae      | D                | 56                  | P                            | 784                    | 0.4                | 0.8                | 1.6                | 339                        | O                           | <i>Gallus</i> <sup>f</sup>      | FC:PI                |    |
| 361                       | <i>Fragaria viridis</i> Duchesne                                                   | Yes     | Rosaceae      | D                | 14                  | P                            | 105                    | 0.1                | 0.2                | 0.4                | 339                        | O                           | <i>Gallus</i> <sup>f</sup>      | FC:PI                |    |
| 362                       | <i>Friesodielsia obovata</i> (Benth.) Verdcourt                                    | Yes     | Annonaceae    | D                | — <sup>n</sup>      | P                            | 392                    | 0.4                | 0.8                | 1.7                | 341                        | O                           | B <sup>c</sup>                  | Fe                   |    |
| 363                       | <i>Froesiodendron surinamense</i> <sup>1</sup>                                     | Yes     | Annonaceae    | D                | — <sup>n</sup>      | P                            | 980                    | 1.0                | 2.0                | 4.1                | 341                        | O                           | B <sup>c</sup>                  | Fe                   |    |
| 364                       | <i>Galinisoga parviflora</i> Cav. Ic.                                              | Yes     | Compositae    | D                | 16                  | A                            | 1,274                  | 1.3                | 2.5                | 5.0                | 375                        | O                           | F                               | Fe                   |    |
| 365                       | <i>Gasteria brachyphylla</i> (Salm-Dyck) E. van Jaarsveld var. <i>brachyphylla</i> | No      | Asphodelaceae | M                | 28                  | P                            | 32,438                 | 33.1               | 66.2               | 132.4              | 377                        | O                           | B                               | Fe                   |    |
| 366                       | <i>Gasteria decipiens</i> <sup>1</sup>                                             | No      | Asphodelaceae | M                | 14                  | P                            | 15,582                 | 15.9               | 31.8               | 63.6               | 377                        | O                           | B                               | Fe                   |    |
| 367                       | <i>Gasteria pulchra</i> <sup>1</sup>                                               | No      | Asphodelaceae | M                | 14                  | P                            | 15,582                 | 15.9               | 31.7               | 63.4               | 377                        | O                           | B                               | Fe                   |    |
| 368                       | <i>Gossypoides kirkii</i> (Mast.) Skovsted                                         | No      | Malvaceae     | D                | 24 <sup>o</sup>     | P                            | 588                    | 0.6                | 1.3                | 2.5                | 349                        | O                           | G <sup>b2</sup>                 | FC:PI                |    |
| 369b                      | <i>Gossypium harknessii</i> Brandg.                                                | No      | Malvaceae     | D                | 26 <sup>o</sup>     | P                            | 980                    | 1.0                | 2.1                | 4.2                | 349                        | O                           | G <sup>b2</sup>                 | FC:PI                |    |
| 370                       | <i>Grammatophyllum scriptum</i> (L.) Bl.                                           | No      | Orchidaceae   | M                | 38, 40 <sup>o</sup> | — <sup>p</sup>               | 1,686 <sup>1</sup>     | 1.7                | 3.4                | 6.8                | 307                        | O                           | <i>Gallus</i> <sup>f</sup>      | FC:PI                |    |
| 371                       | <i>Guatteria schlechtendaliana</i> Mart.                                           | Yes     | Annonaceae    | D                | 28                  | 4                            | P                      | 980                | 1.0                | 2.0                | 4.0                        | 341                         | O                               | B <sup>c</sup>       | Fe |
| 372                       | <i>Guatteria hispida</i> R.E.Fr.                                                   | Yes     | Annonaceae    | D                | 28                  | 4                            | P                      | 1,078              | 1.1                | 2.2                | 4.4                        | 341                         | O                               | B <sup>c</sup>       | Fe |
| 373                       | <i>Hedysarum aucheri</i> Boiss.                                                    | Yes     | Leguminosae   | D                | 16                  | 2                            | P                      | 2,744 <sup>1</sup> | 2.8                | 5.7                | 11.3                       | 363                         | O                               | B <sup>c</sup>       | Fe |
| 374                       | <i>Hedysarum nitidum</i> Willd.                                                    | Yes     | Leguminosae   | D                | 16                  | 2                            | P                      | 2,646 <sup>1</sup> | 2.7                | 5.4                | 10.8                       | 363                         | O                               | B <sup>c</sup>       | Fe |
| 375                       | <i>Hedysarum pestalozzae</i> Boiss.                                                | Yes     | Leguminosae   | D                | 16                  | 2                            | P                      | 2,744 <sup>1</sup> | 2.8                | 5.5                | 11.0                       | 363                         | O                               | B <sup>c</sup>       | Fe |
| 376                       | <i>Hedysarum pycnostachyum</i> Hedge & Hub. -Mor.                                  | Yes     | Leguminosae   | D                | 16                  | 2                            | P                      | 2,254 <sup>1</sup> | 2.3                | 4.7                | 9.3                        | 363                         | O                               | B <sup>c</sup>       | Fe |
| 377                       | <i>Hedysarum rotundifolium</i> Boiss. & Noe                                        | Yes     | Leguminosae   | D                | 16                  | 2                            | P                      | 3,332 <sup>1</sup> | 3.4                | 6.8                | 13.5                       | 363                         | O                               | B <sup>c</sup>       | Fe |
| 378                       | <i>Hedysarum varium</i> Willd.                                                     | Yes     | Leguminosae   | D                | 16                  | 2                            | P                      | 2,450 <sup>1</sup> | 2.5                | 4.9                | 9.8                        | 363                         | O                               | B <sup>c</sup>       | Fe |
| 379                       | <i>Helicia sanguinolenta</i> Lindl.                                                | Yes     | Orchidaceae   | M                | — <sup>n</sup>      | P                            | 3,724                  | 3.8                | 7.7                | 15.3               | 377                        | O                           | F                               | Fe                   |    |





APPENDIX. (continued, the superscript letters refer to notes concerning this table)

| Entry number <sup>a</sup> | Species                                        | Voucher        | Family                  | Monocot or dicot | Ploidy level (x) | 2n±             | Life cycle type <sup>§</sup> | DNA amount             |         |         |         | Original ref. <sup>a</sup> | Present amount† | Standard species* <sup>b1</sup> | Method†† |
|---------------------------|------------------------------------------------|----------------|-------------------------|------------------|------------------|-----------------|------------------------------|------------------------|---------|---------|---------|----------------------------|-----------------|---------------------------------|----------|
|                           |                                                |                |                         |                  |                  |                 |                              | 1C (Mbp <sup>5</sup> ) | 1C (pg) | 2C (pg) | 4C (pg) |                            |                 |                                 |          |
| 408                       | <i>Ilex argentina</i> Lillo                    | Yes            | Aquifoliaceae           | D                | 8                | 80              | P                            | 2,058                  | 2.1     | 4.3     | 8.5     | 322                        | O               | B                               | Fe       |
| 409                       | <i>Ilex paraguayensis</i> St.Hil.              | Yes            | Aquifoliaceae           | D                | 4                | 40              | P                            | 1,078                  | 1.1     | 2.2     | 4.5     | 322                        | O               | B                               | Fe       |
| 410                       | <i>Imperata cylindrica</i> Beauv.              | Yes            | Gramineae               | M                | — <sup>p</sup>   | — <sup>n</sup>  | P                            | 5,292                  | 5.4     | 10.9    | 21.7    | 375                        | O               | F                               | Fe       |
| 411                       | <i>Ionopsidium savianum</i> <sup>1</sup>       | — <sup>m</sup> | Cruciferae <sup>1</sup> | D                | 4                | 32 <sup>o</sup> | A                            | 1,372                  | 1.4     | 2.8     | 5.6     | 313                        | O               | C <sup>d</sup>                  | Fe       |
| 412                       | <i>Ipomoea aquatica</i> Forsk.                 | Yes            | Convolvulaceae          | D                | 30               | 30              | A-P                          | 980                    | 1.0     | 1.9     | 3.8     | 375                        | O               | F                               | Fe       |
| 413                       | <i>Iris aff. maracandica</i> Vved.             | Yes            | Iridaceae               | M                | 20               | 20              | P                            | 7,546                  | 7.7     | 15.4    | 30.9    | 377                        | O               | B                               | Fe       |
| 414                       | <i>Iris aff. orchitoides</i> Carr.             | Yes            | Iridaceae               | M                | 26+3             | 26              | P                            | 9,114                  | 9.3     | 18.6    | 37.2    | 377                        | O               | B                               | Fe       |
| 415                       | <i>Iris albomarginata</i> R.C.Foster           | No             | Iridaceae               | M                | — <sup>p</sup>   | 26              | P                            | 9,996                  | 10.2    | 20.3    | 40.7    | 377                        | O               | B                               | Fe       |
| 416                       | <i>Iris albomarginata</i> R.C.Foster           | No             | Iridaceae               | M                | — <sup>p</sup>   | 50              | P                            | 18,424                 | 18.8    | 37.7    | 75.3    | 377                        | O               | B                               | Fe       |
| 417a                      | <i>Iris bucharica</i> Foster                   | Yes            | Iridaceae               | M                | — <sup>p</sup>   | 20              | P                            | 8,232                  | 8.4     | 16.9    | 33.7    | 377                        | O               | B                               | Fe       |
| 417b                      | <i>Iris bucharica</i> Foster                   | Yes            | Iridaceae               | M                | — <sup>p</sup>   | 22              | P                            | 8,526                  | 8.7     | 17.3    | 34.7    | 377                        | O               | B                               | Fe       |
| 418                       | <i>Iris capnoides</i> <sup>1</sup>             | Yes            | Iridaceae               | M                | — <sup>p</sup>   | 28              | P                            | 9,310                  | 9.5     | 19.0    | 38.1    | 377                        | O               | B                               | Fe       |
| 419a                      | <i>Iris graebneriana</i> Sealy cv. Yellow Fall | Yes            | Iridaceae               | M                | — <sup>p</sup>   | 36              | P                            | 12,446                 | 12.7    | 25.5    | 51.0    | 377                        | O               | B                               | Fe       |
| 419b                      | <i>Iris graebneriana</i> Sealy cv. White Fall  | Yes            | Iridaceae               | M                | — <sup>p</sup>   | c.38-40         | P                            | 13,524                 | 13.8    | 27.5    | 55.1    | 377                        | O               | B                               | Fe       |
| 420                       | <i>Iris magnifica</i> Vved.                    | Yes            | Iridaceae               | M                | — <sup>p</sup>   | 26              | P                            | 8,918                  | 9.1     | 18.3    | 36.6    | 377                        | O               | B                               | Fe       |
| 421a                      | <i>Iris orchitoides</i> Carr.                  | Yes            | Iridaceae               | M                | — <sup>p</sup>   | 26              | P                            | 9,496                  | 9.7     | 19.4    | 38.8    | 377                        | O               | B                               | Fe       |
| 421b                      | <i>Iris orchitoides</i> Carr.                  | No             | Iridaceae               | M                | — <sup>p</sup>   | 30              | P                            | 10,263                 | 10.5    | 20.9    | 41.9    | 377                        | O               | B                               | Fe       |
| 422                       | <i>Iris tubergeniana</i> Foster                | No             | Iridaceae               | M                | — <sup>p</sup>   | 30              | P                            | 9,197                  | 9.4     | 18.8    | 37.5    | 377                        | O               | B                               | Fe       |
| 423                       | <i>Iris tubergeniana</i> Foster                | No             | Iridaceae               | M                | — <sup>p</sup>   | 20              | P                            | 10,780                 | 11.0    | 22.1    | 44.1    | 377                        | O               | B                               | Fe       |
| 424                       | <i>Iris vicaria</i> Vved.                      | No             | Iridaceae               | M                | — <sup>p</sup>   | 22              | P                            | 8,293                  | 8.5     | 16.9    | 33.9    | 377                        | O               | B                               | Fe       |
| 425a                      | <i>Iris vicaria</i> Vved.                      | Yes            | Iridaceae               | M                | — <sup>p</sup>   | c.46            | P                            | 14,700                 | 15.0    | 30.0    | 60.1    | 377                        | O               | B                               | Fe       |
| 425b                      | <i>Iris vicaria</i> Vved.                      | Yes            | Iridaceae               | M                | — <sup>p</sup>   | 46              | P                            | 16,562                 | 16.9    | 33.8    | 67.5    | 377                        | O               | B                               | Fe       |
| 426                       | <i>Iris zenaidae</i> <sup>1</sup>              | No             | Iridaceae               | M                | — <sup>p</sup>   | 50              | P                            | 18,228                 | 18.6    | 37.2    | 74.5    | 377                        | O               | B                               | Fe       |
| 427                       | <i>Kadsura coccinea</i> <sup>1</sup>           | Yes            | Schisandraceae          | D                | — <sup>p</sup>   | 28              | P                            | 7,252                  | 7.4     | 14.8    | 29.6    | 341                        | O               | B <sup>c</sup>                  | Fe       |
| 428                       | <i>Kadsura japonica</i> (L.) Dunal.            | Yes            | Schisandraceae          | D                | — <sup>p</sup>   | 28              | P                            | 7,938                  | 8.1     | 16.3    | 32.5    | 341                        | O               | B <sup>c</sup>                  | Fe       |
| 429                       | <i>Kadsura longispicata</i> <sup>1</sup>       | Yes            | Schisandraceae          | D                | — <sup>p</sup>   | 28              | P                            | 8,722                  | 8.9     | 17.7    | 35.4    | 341                        | O               | B <sup>c</sup>                  | Fe       |
| 430                       | <i>Kokia drynarioides</i> Lewton               | No             | Malvaceae               | D                | 2                | 24 <sup>o</sup> | P                            | 588                    | 0.6     | 1.3     | 2.5     | 349                        | O               | G <sup>b2</sup>                 | FC:PI    |
| 431                       | <i>Laelia rubescens</i> Rolfe                  | No             | Orchidaceae             | M                | — <sup>p</sup>   | 40 <sup>o</sup> | P                            | 1,200 <sup>1</sup>     | 1.3     | 2.5     | 5.0     | 307                        | O               | <i>Gallus</i> <sup>f</sup>      | FC:PI    |
| 432                       | <i>Laelia tenebrosa</i> Rolfe                  | No             | Orchidaceae             | M                | — <sup>p</sup>   | — <sup>n</sup>  | P                            | 1,720 <sup>1</sup>     | 1.8     | 3.5     | 7.0     | 307                        | O               | <i>Gallus</i> <sup>f</sup>      | FC:PI    |
| 433                       | <i>Lagurus ovatus</i> L.                       | No             | Gramineae               | M                | 2                | 14              | A                            | 3,430                  | 3.5     | 7.0     | 14.0    | 373                        | O               | G <sup>b2</sup>                 | FC:PI    |
| 434                       | <i>Lagarosiphon major</i> Moss                 | Yes            | Hydrocharitaceae        | M                | — <sup>p</sup>   | 22              | P                            | 3,234                  | 3.3     | 6.5     | 13.0    | 375                        | O               | F                               | Fe       |
| 435c                      | <i>Lathyrus annuus</i> L. <sup>h</sup>         | Yes            | Leguminosae             | D                | 2                | 14              | A                            | 6,664                  | 6.8     | 13.5    | 27.0    | 319                        | O               | F & G                           | FC:PI    |
| 435d                      | <i>Lathyrus annuus</i> L. <sup>h</sup>         | Yes            | Leguminosae             | D                | 2                | 14              | A                            | 7,350                  | 7.5     | 15.0    | 30.0    | 319                        | O               | F & G                           | FC:PI    |
| 436                       | <i>Lathyrus basalticus</i> Rech.f              | Yes            | Leguminosae             | D                | 2                | 14              | A                            | 4,998                  | 5.1     | 10.2    | 20.4    | 319                        | O               | F & G                           | FC:PI    |
| 437                       | <i>Lathyrus belinensis</i> Maxted & Goyder     | Yes            | Leguminosae             | D                | 2                | 14              | A                            | 7,546                  | 7.7     | 15.3    | 30.6    | 319                        | O               | F & G                           | FC:PI    |
| 438                       | <i>Lathyrus blepharicarpus</i> Boiss.          | Yes            | Leguminosae             | D                | 2                | 14              | A                            | 6,566                  | 6.7     | 13.3    | 26.6    | 319                        | O               | F & G                           | FC:PI    |

|      |                                                        |                |   |                 |                |   |        |      |      |      |                   |   |                                 |       |
|------|--------------------------------------------------------|----------------|---|-----------------|----------------|---|--------|------|------|------|-------------------|---|---------------------------------|-------|
| 439b | <i>Lathyrus cassius</i> Boiss.                         | Yes            | D | 14              | 2              | A | 8,428  | 8.6  | 17.2 | 34.4 | 319               | O | F & G                           | FC:PI |
| 440  | <i>Lathyrus chloranthus</i> Boiss.                     | Yes            | D | 14              | 2              | A | 6,370  | 6.5  | 13.0 | 26.0 | 319               | O | F & G                           | FC:PI |
| 441b | <i>Lathyrus chrysanthus</i> Boiss.                     | Yes            | D | 14              | 2              | A | 6,860  | 7.0  | 13.9 | 27.8 | 319               | O | F & G                           | FC:PI |
| 442e | <i>Lathyrus cicera</i> L.                              | Yes            | D | 14              | 2              | A | 5,880  | 6.0  | 11.9 | 23.8 | 319               | O | F & G                           | FC:PI |
| 443b | <i>Lathyrus ciliolatus</i> Rech.f.                     | Yes            | D | 14              | 2              | A | 5,194  | 5.3  | 10.6 | 21.2 | 319               | O | F & G                           | FC:PI |
| 443c | <i>Lathyrus ciliolatus</i> Rech.f.                     | Yes            | D | 14              | 2              | A | 5,292  | 5.4  | 10.7 | 21.4 | 319               | O | F & G                           | FC:PI |
| 444  | <i>Lathyrus cirrhosus</i> Ser.                         | Yes            | D | 14              | 2              | P | 10,780 | 11.0 | 21.9 | 43.8 | 319               | O | F & G                           | FC:PI |
| 445  | <i>Lathyrus giganteus</i> <sup>1</sup>                 | Yes            | D | 14              | 2              | P | 9,898  | 10.1 | 20.1 | 40.2 | 319               | O | F & G                           | FC:PI |
| 446a | <i>Lathyrus gorgoni</i> Parl. <sup>h</sup>             | Yes            | D | 14              | 2              | A | 5,684  | 5.8  | 11.5 | 23.0 | 319               | O | F & G                           | FC:PI |
| 446b | <i>Lathyrus gorgoni</i> Parl. <sup>h</sup>             | Yes            | D | 14              | 2              | A | 6,370  | 6.5  | 13.0 | 26.0 | 319               | O | F & G                           | FC:PI |
| 447  | <i>Lathyrus grandiflorus</i> Sibth & Sm.               | Yes            | D | 14              | 2              | P | 9,114  | 9.3  | 18.5 | 37.0 | 319               | O | F & G                           | FC:PI |
| 448  | <i>Lathyrus heterophyllus</i> L.                       | Yes            | D | 14              | 2              | P | 9,016  | 9.2  | 18.4 | 36.8 | 319               | O | F & G                           | FC:PI |
| 449  | <i>Lathyrus hierosolymitanus</i> Boiss.                | Yes            | D | 14              | 2              | A | 6,860  | 7.0  | 14.0 | 28.0 | 319               | O | F & G                           | FC:PI |
| 450f | <i>Lathyrus hirsutus</i> L. <sup>h</sup>               | Yes            | D | 14              | 2              | A | 6,272  | 6.4  | 12.7 | 25.4 | 319               | O | F & G                           | FC:PI |
| 450g | <i>Lathyrus hirsutus</i> L. <sup>h</sup>               | Yes            | D | 14              | 2              | A | 7,154  | 7.3  | 14.5 | 29.0 | 319               | O | F & G                           | FC:PI |
| 451  | <i>Lathyrus hirticarpus</i> Mattiaia & Heyn            | Yes            | D | 14              | 2              | A | 6,468  | 6.6  | 13.1 | 26.2 | 319               | O | F & G                           | FC:PI |
| 452d | <i>Lathyrus latifolius</i> L. <sup>h</sup>             | Yes            | D | 14              | 2              | P | 9,800  | 10.0 | 20.0 | 40.0 | 319               | O | F & G                           | FC:PI |
| 452e | <i>Lathyrus latifolius</i> L. <sup>h</sup>             | Yes            | D | 14              | 2              | P | 11,858 | 12.1 | 24.2 | 48.4 | 319               | O | F & G                           | FC:PI |
| 453  | <i>Lathyrus mulkaka</i> Lipsky                         | Yes            | D | 14              | 2              | P | 7,644  | 7.8  | 15.6 | 31.2 | 319               | O | F & G                           | FC:PI |
| 454h | <i>Lathyrus odoratus</i> L.                            | Yes            | D | 14              | 2              | A | 7,056  | 7.2  | 14.3 | 28.6 | 319               | O | F & G                           | FC:PI |
| 455  | <i>Lathyrus pseudo-cicera</i> Pampan.                  | Yes            | D | 14              | 2              | A | 5,978  | 6.1  | 12.1 | 24.2 | 319               | O | F & G                           | FC:PI |
| 456e | <i>Lathyrus sativus</i> L.                             | Yes            | D | 14              | 2              | A | 6,860  | 7.0  | 14.0 | 28.0 | 319               | O | F & G                           | FC:PI |
| 457d | <i>Lathyrus sylvestris</i> L. <sup>1</sup>             | Yes            | D | 14              | 2              | P | 11,466 | 11.7 | 23.3 | 46.6 | 319               | O | F & G                           | FC:PI |
| 457e | <i>Lathyrus sylvestris</i> L. <sup>1</sup>             | Yes            | D | 14              | 2              | P | 11,564 | 11.8 | 23.6 | 47.2 | 319               | O | F & G                           | FC:PI |
| 458e | <i>Lathyrus tingitanus</i> L. <sup>h</sup>             | Yes            | D | 14              | 2              | A | 7,056  | 7.2  | 14.3 | 28.6 | 319               | O | F & G                           | FC:PI |
| 458f | <i>Lathyrus tingitanus</i> L. <sup>h</sup>             | Yes            | D | 14              | 2              | A | 10,192 | 10.4 | 20.7 | 41.4 | 319               | O | F & G                           | FC:PI |
| 459  | <i>Lavatera arborea</i> L.                             | — <sup>m</sup> | D | 42 <sup>o</sup> | 6              | B | 1,666  | 1.7  | 3.4  | 6.7  | 313               | O | C <sup>d</sup>                  | Fe    |
| 460  | <i>Leymus akmolinsensis</i> (Drob.) Tzvelev            | No             | M | 28              | 4              | P | 11,074 | 11.3 | 22.6 | 45.2 | 343 <sup>al</sup> | O | A <sup>c</sup> & F <sup>c</sup> | FC:PI |
| 461  | <i>Leymus ambiguus</i> (Vasey & Scribn.) D.R.Dewey     | No             | M | — <sup>n</sup>  | — <sup>p</sup> | P | 10,878 | 11.1 | 22.3 | 44.5 | 343 <sup>al</sup> | O | A <sup>c</sup> & F <sup>c</sup> | FC:PI |
| 462  | <i>Leymus chinensis</i> (Trin.) Tzvelev <sup>1</sup>   | No             | M | 28              | 4              | P | 9,702  | 9.9  | 19.7 | 39.4 | 343 <sup>al</sup> | O | A <sup>c</sup> & F <sup>c</sup> | FC:PI |
| 463  | <i>Leymus flavens</i> (Scribn. & Smith) Pilger         | No             | M | 28              | 4              | P | 11,956 | 12.2 | 24.4 | 48.9 | 343 <sup>al</sup> | O | A <sup>c</sup> & F <sup>c</sup> | FC:PI |
| 464  | <i>Leymus racemosus</i> (Lam.) Tzvelev <sup>1</sup>    | No             | M | 28              | 4              | P | 11,172 | 11.4 | 22.8 | 45.6 | 343 <sup>al</sup> | O | A <sup>c</sup> & F <sup>c</sup> | FC:PI |
| 465  | <i>Leymus sabulosus</i> (M.Bieb.) Tzvelev <sup>1</sup> | No             | M | 28              | 4              | P | 11,270 | 11.5 | 23.0 | 46.0 | 343 <sup>al</sup> | O | A <sup>c</sup> & F <sup>c</sup> | FC:PI |
| 466  | <i>Leymus secalinus</i> (Georgi) Tzvelev <sup>1</sup>  | No             | M | 28              | 4              | P | 10,584 | 10.8 | 21.6 | 43.1 | 343 <sup>al</sup> | O | A <sup>c</sup> & F <sup>c</sup> | FC:PI |
| 467  | <i>Leymus triticoides</i> (Buckl.) Pilger <sup>1</sup> | No             | M | 28              | 4              | P | 10,976 | 11.2 | 22.4 | 44.8 | 343 <sup>al</sup> | O | A <sup>c</sup> & F <sup>c</sup> | FC:PI |
| 468  | <i>Limonium perezi</i> (Stapf) Hubb.                   | No             | D | 14              | 2              | P | 4,214  | 4.3  | 8.7  | 17.4 | 316               | O | E <sup>y</sup>                  | FC:PI |
| 469  | <i>Limonium perigrinum</i> Bergius                     | No             | D | 24              | 2              | P | 6,860  | 7.0  | 14.0 | 28.0 | 315               | O | <i>Avena</i> <sup>y</sup>       | FC:PI |
| 470  | <i>Limonium purpuratum</i> L.                          | No             | D | 24              | 2              | P | 9,506  | 9.7  | 19.4 | 38.7 | 315               | O | <i>Avena</i> <sup>y</sup>       | FC:PI |
| 471  | <i>Limonium sinuatum</i> (L.) Mill.                    | No             | D | 16              | 2              | P | 3,136  | 3.2  | 6.4  | 12.8 | 316               | O | E <sup>y</sup>                  | FC:PI |

APPENDIX. (continued, the superscript letters refer to notes concerning this table)

| Entry number <sup>e</sup> | Species                                                                                   | Voucher | Family      | Monocot or dicot | Ploidy level (x) | Life cycle type <sup>§</sup> | DNA amount             |         |         |         | Original ref. <sup>a</sup> | Present amount <sup>†</sup> | Standard species <sup>*,b1</sup> | Method <sup>††</sup> |
|---------------------------|-------------------------------------------------------------------------------------------|---------|-------------|------------------|------------------|------------------------------|------------------------|---------|---------|---------|----------------------------|-----------------------------|----------------------------------|----------------------|
|                           |                                                                                           |         |             |                  |                  |                              | IC (Mbp <sup>§</sup> ) | 1C (pg) | 2C (pg) | 4C (pg) |                            |                             |                                  |                      |
| 472                       | <i>Lochneria oerstedii</i> Rchb.f.                                                        | Yes     | Orchidaceae | M                | 2                | P                            | 1,764                  | 1.8     | 3.6     | 7.2     | O                          | F                           | Fe                               |                      |
| 473                       | <i>Lonchocarpus acuminatus</i> (Schldl.) M.Sousa <sup>i</sup>                             | Yes     | Leguminosae | D                | 2                | P                            | 644                    | 0.7     | 1.3     | 2.6     | O                          | F                           | Fe                               |                      |
| 474                       | <i>Lonchocarpus agyrotichus</i> Harms <sup>i</sup>                                        | Yes     | Leguminosae | D                | 2                | P                            | 615                    | 0.6     | 1.3     | 2.5     | O                          | F                           | Fe                               |                      |
| 475                       | <i>Lonchocarpus andrieuxii</i> M.Sousa                                                    | Yes     | Leguminosae | D                | 2                | P                            | 617                    | 0.6     | 1.3     | 2.5     | O                          | F                           | Fe                               |                      |
| 476                       | <i>Lonchocarpus angusticarpus</i> M.Sousa, ined.                                          | Yes     | Leguminosae | D                | 2                | P                            | 497                    | 0.5     | 1.0     | 2.0     | O                          | F                           | Fe                               |                      |
| 477                       | <i>Lonchocarpus atropurpureus</i> Benth.                                                  | Yes     | Leguminosae | D                | 2                | P                            | 522                    | 0.5     | 1.1     | 2.1     | O                          | F                           | Fe                               |                      |
| 478                       | <i>Lonchocarpus balsensis</i> M.Sousa & J.C.Soto <sup>i</sup>                             | Yes     | Leguminosae | D                | 2                | P                            | 608                    | 0.6     | 1.2     | 2.5     | O                          | F                           | Fe                               |                      |
| 479                       | <i>Lonchocarpus castilloi</i> Standl.                                                     | Yes     | Leguminosae | D                | 2                | P                            | 502                    | 0.5     | 1.0     | 2.1     | O                          | F                           | Fe                               |                      |
| 480                       | <i>Lonchocarpus caudatus</i> Pittier                                                      | Yes     | Leguminosae | D                | 2                | P                            | 652                    | 0.7     | 1.3     | 2.7     | O                          | F                           | Fe                               |                      |
| 481                       | <i>Lonchocarpus chavelasii</i> M.Sousa, ined.                                             | Yes     | Leguminosae | D                | 2                | P                            | 556                    | 0.6     | 1.1     | 2.3     | O                          | F                           | Fe                               |                      |
| 482                       | <i>Lonchocarpus Chiangii</i> M.Sousa                                                      | Yes     | Leguminosae | D                | 2                | P                            | 527                    | 0.5     | 1.1     | 2.2     | O                          | F                           | Fe                               |                      |
| 483                       | <i>Lonchocarpus constrictus</i> Pittier                                                   | Yes     | Leguminosae | D                | 2                | P                            | 568                    | 0.6     | 1.2     | 2.3     | O                          | F                           | Fe                               |                      |
| 484a                      | <i>Lonchocarpus cruentus</i> Lundell ssp. <i>cruentus</i>                                 | Yes     | Leguminosae | D                | 2                | P                            | 593                    | 0.6     | 1.2     | 2.4     | O                          | F                           | Fe                               |                      |
| 484b                      | <i>Lonchocarpus cruentus</i> Lundell ssp. <i>grandiflorus</i> M.Sousa, ined.              | Yes     | Leguminosae | D                | 2                | P                            | 610                    | 0.6     | 1.3     | 2.5     | O                          | F                           | Fe                               |                      |
| 485                       | <i>Lonchocarpus emarginatus</i> Pittier                                                   | Yes     | Leguminosae | D                | 2                | P                            | 517                    | 0.5     | 1.1     | 2.1     | O                          | F                           | Fe                               |                      |
| 486                       | <i>Lonchocarpus epigeus</i> M.Sousa                                                       | Yes     | Leguminosae | D                | 2                | P                            | 666                    | 0.7     | 1.4     | 2.7     | O                          | F                           | Fe                               |                      |
| 487a                      | <i>Lonchocarpus eriocarinalis</i> Micheli <sup>i</sup>                                    | Yes     | Leguminosae | D                | 2                | P                            | 578                    | 0.6     | 1.2     | 2.4     | O                          | F                           | Fe                               |                      |
| 487b                      | <i>Lonchocarpus eriocarinalis</i> Micheli <sup>i</sup>                                    | Yes     | Leguminosae | D                | 2                | P                            | 649                    | 0.7     | 1.3     | 2.7     | O                          | F                           | Fe                               |                      |
| 488                       | <i>Lonchocarpus eriophyllus</i> Benth.                                                    | Yes     | Leguminosae | D                | 2                | P                            | 620                    | 0.6     | 1.3     | 2.5     | O                          | F                           | Fe                               |                      |
| 489a                      | <i>Lonchocarpus guatemalensis</i> Benth. var. <i>guatemalensis</i>                        | Yes     | Leguminosae | D                | 2                | P                            | 593                    | 0.6     | 1.2     | 2.4     | O                          | F                           | Fe                               |                      |
| 489b                      | <i>Lonchocarpus guatemalensis</i> Benth. var. <i>protantherus</i> (Pittier) Hermann       | Yes     | Leguminosae | D                | 2                | P                            | 652                    | 0.7     | 1.3     | 2.7     | O                          | F                           | Fe                               |                      |
| 490                       | <i>Lonchocarpus hermannii</i> M.Sousa <sup>i</sup>                                        | Yes     | Leguminosae | D                | 2                | P                            | 571                    | 0.6     | 1.2     | 2.3     | O                          | F                           | Fe                               |                      |
| 491                       | <i>Lonchocarpus hidalgensis</i> Lundell                                                   | Yes     | Leguminosae | D                | 2                | P                            | 578                    | 0.6     | 1.2     | 2.4     | O                          | F                           | Fe                               |                      |
| 492                       | <i>Lonchocarpus hintonii</i> Sandw.                                                       | Yes     | Leguminosae | D                | 2                | P                            | 647                    | 0.7     | 1.3     | 2.6     | O                          | F                           | Fe                               |                      |
| 493                       | <i>Lonchocarpus huetamoensis</i> M.Sousa & J.C.Soto ssp. <i>huetamoensis</i> <sup>i</sup> | Yes     | Leguminosae | D                | 2                | P                            | 686                    | 0.7     | 1.4     | 2.8     | O                          | F                           | Fe                               |                      |

|      |                                                                                              |     |             |   |    |   |   |     |     |     |     |     |   |   |    |
|------|----------------------------------------------------------------------------------------------|-----|-------------|---|----|---|---|-----|-----|-----|-----|-----|---|---|----|
| 494  | <i>Lonchocarpus Hughesii</i> M.Sousa                                                         | Yes | Leguminosae | D | 22 | 2 | P | 576 | 0.6 | 1.2 | 2.4 | 327 | O | F | Fe |
| 495  | <i>Lonchocarpus lanceolatus</i> Benth. <sup>1</sup>                                          | Yes | Leguminosae | D | 22 | 2 | P | 659 | 0.7 | 1.4 | 2.7 | 327 | O | F | Fe |
| 496  | <i>Lonchocarpus longipedunculatus</i><br>M.Sousa & J.C.Soto <sup>1</sup>                     | Yes | Leguminosae | D | 22 | 2 | P | 676 | 0.7 | 1.4 | 2.8 | 327 | O | F | Fe |
| 497  | <i>Lonchocarpus luteomaclulatus</i><br>Pittier <sup>1</sup>                                  | Yes | Leguminosae | D | 22 | 2 | P | 507 | 0.5 | 1.0 | 2.1 | 327 | O | F | Fe |
| 498  | <i>Lonchocarpus macrocarpus</i> Benth. <sup>1</sup>                                          | Yes | Leguminosae | D | 22 | 2 | P | 640 | 0.7 | 1.3 | 2.6 | 327 | O | F | Fe |
| 499  | <i>Lonchocarpus martinzii</i> M.Sousa,<br>ined.                                              | Yes | Leguminosae | D | 22 | 2 | P | 595 | 0.6 | 1.2 | 2.4 | 327 | O | F | Fe |
| 500  | <i>Lonchocarpus minimiflorus</i> Donn.<br>Sm.                                                | Yes | Leguminosae | D | 22 | 2 | P | 559 | 0.6 | 1.1 | 2.3 | 327 | O | F | Fe |
| 501  | <i>Lonchocarpus molinae</i> Standl. &<br>L.O.Wms.                                            | Yes | Leguminosae | D | 22 | 2 | P | 532 | 0.5 | 1.1 | 2.2 | 327 | O | F | Fe |
| 502  | <i>Lonchocarpus morenoi</i> M.Sousa                                                          | Yes | Leguminosae | D | 22 | 2 | P | 637 | 0.7 | 1.3 | 2.6 | 327 | O | F | Fe |
| 503  | <i>Lonchocarpus mutans</i> M.Sousa                                                           | Yes | Leguminosae | D | 22 | 2 | P | 517 | 0.5 | 1.1 | 2.1 | 327 | O | F | Fe |
| 504  | <i>Lonchocarpus obovatus</i> Benth. <sup>1</sup>                                             | Yes | Leguminosae | D | 22 | 2 | P | 505 | 0.5 | 1.0 | 2.1 | 327 | O | F | Fe |
| 505  | <i>Lonchocarpus parviflorus</i> Benth.                                                       | Yes | Leguminosae | D | 22 | 2 | P | 551 | 0.6 | 1.1 | 2.3 | 327 | O | F | Fe |
| 506  | <i>Lonchocarpus peninsularis</i> (J.D.<br>Sm.) Pittier                                       | Yes | Leguminosae | D | 22 | 2 | P | 519 | 0.5 | 1.1 | 2.1 | 327 | O | F | Fe |
| 507  | <i>Lonchocarpus phaseolifolius</i> Benth.                                                    | Yes | Leguminosae | D | 22 | 2 | P | 556 | 0.6 | 1.1 | 2.3 | 327 | O | F | Fe |
| 508  | <i>Lonchocarpus phlebophyllus</i><br>Standl. & Steyerl.                                      | Yes | Leguminosae | D | 22 | 2 | P | 510 | 0.5 | 1.0 | 2.1 | 327 | O | F | Fe |
| 509a | <i>Lonchocarpus punctatus</i> Kunth ssp.<br><i>longistylus</i> M.Sousa, comb. nov.,<br>ined. | Yes | Leguminosae | D | 22 | 2 | P | 532 | 0.5 | 1.1 | 2.2 | 327 | O | F | Fe |
| 509b | <i>Lonchocarpus punctatus</i> Kunth ssp.<br><i>vittatus</i> M.Sousa, ined.                   | Yes | Leguminosae | D | 22 | 2 | P | 532 | 0.5 | 1.1 | 2.2 | 327 | O | F | Fe |
| 509c | <i>Lonchocarpus punctatus</i> Kunth ssp.<br><i>berriozabelensis</i> M.Sousa, ined.           | Yes | Leguminosae | D | 22 | 2 | P | 534 | 0.6 | 1.1 | 2.2 | 327 | O | F | Fe |
| 510a | <i>Lonchocarpus rugosus</i> Benth. ssp.<br><i>rugosus</i> <sup>1</sup>                       | Yes | Leguminosae | D | 22 | 2 | P | 529 | 0.5 | 1.1 | 2.2 | 327 | O | F | Fe |
| 510b | <i>Lonchocarpus rugosus</i> Benth. ssp.<br><i>apricus</i> (Lundell) M.Sousa <sup>1</sup>     | Yes | Leguminosae | D | 22 | 2 | P | 537 | 0.6 | 1.1 | 2.2 | 327 | O | F | Fe |
| 511  | <i>Lonchocarpus salvadorensis</i> Pittier                                                    | Yes | Leguminosae | D | 22 | 2 | P | 686 | 0.7 | 1.4 | 2.8 | 327 | O | F | Fe |
| 512  | <i>Lonchocarpus sanctuarii</i> Standl. &<br>L.O.Wms.                                         | Yes | Leguminosae | D | 22 | 2 | P | 696 | 0.7 | 1.4 | 2.8 | 327 | O | F | Fe |
| 513  | <i>Lonchocarpus santarosanus</i> Donn.<br>Sm. <sup>1</sup>                                   | Yes | Leguminosae | D | 22 | 2 | P | 524 | 0.5 | 1.1 | 2.1 | 327 | O | F | Fe |
| 514  | <i>Lonchocarpus schiedeanus</i> (Schldl.)<br>Harms <sup>1</sup>                              | Yes | Leguminosae | D | 22 | 2 | P | 578 | 0.6 | 1.2 | 2.4 | 327 | O | F | Fe |
| 515  | <i>Lonchocarpus schubertiae</i> M.Sousa <sup>1</sup>                                         | Yes | Leguminosae | D | 22 | 2 | P | 652 | 0.7 | 1.3 | 2.7 | 327 | O | F | Fe |
| 516  | <i>Lonchocarpus spectabilis</i> Hermann                                                      | Yes | Leguminosae | D | 22 | 2 | P | 517 | 0.5 | 1.1 | 2.1 | 327 | O | F | Fe |
| 517  | <i>Lonchocarpus torresiorum</i><br>M.Sousa, ined.                                            | Yes | Leguminosae | D | 22 | 2 | P | 605 | 0.6 | 1.2 | 2.5 | 327 | O | F | Fe |

APPENDIX. (continued, the superscript letters refer to notes concerning this table)

| Entry number <sup>s</sup> | Species                                                                                   | Voucher        | Family                   | Monocot or dicot | 2n <sup>†</sup> | Ploidy level (x) | Life cycle type <sup>§</sup> | DNA amount            |                   |                    |                    | Original ref. <sup>a</sup> | Present amount <sup>††</sup> | Standard species* <sup>b1</sup> | Method <sup>††</sup> |
|---------------------------|-------------------------------------------------------------------------------------------|----------------|--------------------------|------------------|-----------------|------------------|------------------------------|-----------------------|-------------------|--------------------|--------------------|----------------------------|------------------------------|---------------------------------|----------------------|
|                           |                                                                                           |                |                          |                  |                 |                  |                              | IC (Mbp) <sup>s</sup> | 1C (pg)           | 2C (pg)            | 4C (pg)            |                            |                              |                                 |                      |
| 518                       | <i>Lonchocarpus xuul</i> Lundell                                                          | Yes            | Leguminosae              | D                | 22              | 2                | P                            | 701                   | 0.7               | 1.4                | 2.9                | 327                        | O                            | F                               | Fe                   |
| 519                       | <i>Lupinus anatolicus</i> W.Swiecicki & W.K.Swiecicki                                     | Yes            | Leguminosae <sup>i</sup> | D                | c.42            | 2                | A                            | 588                   | 0.6               | 1.2                | 2.4                | 369                        | O                            | <i>Glycine</i> <sup>e</sup>     | FC:PI                |
| 520                       | <i>Lupinus hispanicus</i> Boiss. & Reut. ssp. <i>hispanicus</i> "Badajoz-2" <sup>ni</sup> | Yes            | Leguminosae <sup>i</sup> | D                | 52              | 2                | A                            | 1,078                 | 1.1               | 2.1                | 4.2                | 369                        | O                            | <i>Glycine</i> <sup>e</sup>     | FC:PI                |
| 521b                      | <i>Lupinus luteus</i> L. "Palucki" <sup>ni</sup>                                          | Yes            | Leguminosae <sup>i</sup> | D                | 52              | 2                | A                            | 1,176                 | 1.2               | 2.4                | 4.7                | 369                        | O                            | <i>Glycine</i> <sup>e</sup>     | FC:PI                |
| 522a                      | <i>Lupinus pilosus</i> Murr. <sup>h</sup>                                                 | Yes            | Leguminosae <sup>i</sup> | D                | 42              | 2                | A                            | 588                   | 0.6               | 1.2                | 2.5                | 369                        | O                            | <i>Glycine</i> <sup>e</sup>     | FC:PI                |
| 522b                      | <i>Lupinus pilosus</i> Murr. <sup>h</sup>                                                 | Yes            | Leguminosae <sup>i</sup> | D                | 42              | 2                | A                            | 686                   | 0.7               | 1.4                | 2.7                | 369                        | O                            | <i>Glycine</i> <sup>e</sup>     | FC:PI                |
| 523                       | <i>Lycianthes asarifolia</i> Bitter                                                       | No             | Solanaceae               | D                | - <sup>n</sup>  | - <sup>p</sup>   | - <sup>q</sup>               | 1,568                 | 1.6               | 3.2                | 6.3                | 373                        | O                            | G <sup>b2</sup>                 | FC:PI                |
| 524j                      | <i>Lycopersicon esculentum</i> Mill. cv. Moneymaker                                       | No             | Solanaceae               | D                | 24              | 2                | A                            | 916                   | 0.9               | 1.9                | 3.7                | 337                        | O                            | <i>Gallus</i> <sup>f</sup>      | FC:PI                |
| 525                       | <i>Malva sylvestris</i> L.                                                                | - <sup>m</sup> | Malvaceae                | D                | 42 <sup>o</sup> | 6                | P                            | 1,470                 | 1.5               | 2.9                | 5.9                | 313                        | O                            | C <sup>d</sup>                  | Fe                   |
| 526                       | <i>Mammillaria bocasana</i> Pos.                                                          | Yes            | Cactaceae                | D                | 22              | 2                | P                            | 4,802 <sup>ah</sup>   | 4.9 <sup>ah</sup> | 9.7 <sup>ah</sup>  | 19.5 <sup>ah</sup> | 334                        | O                            | B <sup>c</sup>                  | Fe                   |
| 527                       | <i>Mammillaria boottii</i> G.Lindsay                                                      | Yes            | Cactaceae                | D                | 22              | 2                | P                            | 4,508 <sup>ah</sup>   | 4.6 <sup>ah</sup> | 9.2 <sup>ah</sup>  | 18.4 <sup>ah</sup> | 334                        | O                            | B <sup>c</sup>                  | Fe                   |
| 528                       | <i>Mammillaria grandiflora</i> Otto & Pfeiffer                                            | Yes            | Cactaceae                | D                | 22              | 2                | P                            | 4,998 <sup>ah</sup>   | 5.1 <sup>ah</sup> | 10.2 <sup>ah</sup> | 20.4 <sup>ah</sup> | 334                        | O                            | B <sup>c</sup>                  | Fe                   |
| 529                       | <i>Mammillaria hahniana</i> Werd.                                                         | Yes            | Cactaceae                | D                | 22              | 2                | P                            | 4,802 <sup>ah</sup>   | 4.9 <sup>ah</sup> | 9.8 <sup>ah</sup>  | 19.6 <sup>ah</sup> | 334                        | O                            | B <sup>c</sup>                  | Fe                   |
| 530                       | <i>Mammillaria occidentalis</i> (Br. & R.) Bod.                                           | Yes            | Cactaceae                | D                | 22              | 2                | P                            | 5,978 <sup>ah</sup>   | 6.1 <sup>ah</sup> | 12.2 <sup>ah</sup> | 24.4 <sup>ah</sup> | 334                        | O                            | B <sup>c</sup>                  | Fe                   |
| 531                       | <i>Mammillaria plumosa</i> Web.                                                           | Yes            | Cactaceae                | D                | 22              | 2                | P                            | 6,468 <sup>ah</sup>   | 6.6 <sup>ah</sup> | 13.2 <sup>ah</sup> | 26.5 <sup>ah</sup> | 334                        | O                            | B <sup>c</sup>                  | Fe                   |
| 532                       | <i>Mammillaria rhodantha</i> Lk. & O.                                                     | Yes            | Cactaceae                | D                | 22              | 2                | P                            | 6,860 <sup>ah</sup>   | 7.0 <sup>ah</sup> | 13.9 <sup>ah</sup> | 27.8 <sup>ah</sup> | 334                        | O                            | B <sup>c</sup>                  | Fe                   |
| 533                       | <i>Mammillaria san-angelensis</i> Sanchez-Mejorada                                        | Yes            | Cactaceae                | D                | 22              | 2                | P                            | 1,568                 | 1.6               | 3.2                | 6.4                | 328                        | O                            | <i>Lycopers.</i> <sup>e</sup>   | FC:PI                |
| 534                       | <i>Mammillaria zeltmanniana</i> Bod.                                                      | Yes            | Cactaceae                | D                | 22              | 2                | P                            | 5,684 <sup>ah</sup>   | 5.8 <sup>ah</sup> | 11.6 <sup>ah</sup> | 23.1 <sup>ah</sup> | 334                        | O                            | B <sup>c</sup>                  | Fe                   |
| 535                       | <i>Maranta arundinacea</i> L. var. <i>variegatum</i>                                      | No             | Marantaceae              | M                | 48              | 4                | P                            | 392                   | 0.4               | 0.8                | 1.5                | 355                        | C                            | J <sup>o</sup>                  | Fe                   |
| 536                       | <i>Maranta bicolor</i> Ker-Gawl                                                           | No             | Marantaceae              | M                | 52 <sup>o</sup> | 4                | P                            | 490                   | 0.5               | 1.1                | 2.1                | 377                        | O                            | J                               | Fe                   |
| 537                       | <i>Medemia argun</i> Wuert. ex H.Wendl.                                                   | Yes            | Palmae                   | M                | - <sup>n</sup>  | - <sup>p</sup>   | P                            | 3,528                 | 3.6               | 7.3                | 14.5               | 377                        | O                            | B                               | Fe                   |
| 538                       | <i>Microtea scabrida</i> Urban                                                            | Yes            | Phytolaccaceae           | D                | 18              | 2                | P                            | 2,058                 | 2.1               | 4.2                | 8.3                | 354                        | O                            | B                               | Fe                   |
| 539                       | <i>Miltonia clowesii</i> Lindl.                                                           | Yes            | Orchidaceae              | M                | - <sup>n</sup>  | - <sup>p</sup>   | P                            | 3,724                 | 3.8               | 7.6                | 15.2               | 377                        | O                            | F                               | Fe                   |
| 540                       | <i>Miltonia regnellii</i> Rehb.f.                                                         | Yes            | Orchidaceae              | M                | 60 <sup>o</sup> | - <sup>p</sup>   | P                            | 4,606                 | 4.7               | 9.4                | 18.8               | 377                        | O                            | F                               | Fe                   |
| 541                       | <i>Mimosa invisa</i> Mart                                                                 | Yes            | Leguminosae              | D                | 26              | 2                | B-P                          | 686                   | 0.7               | 1.4                | 2.7                | 375                        | O                            | F                               | Fe                   |
| 542                       | <i>Mimosa pudica</i> <sup>d</sup>                                                         | Yes            | Leguminosae              | D                | 52              | 4                | P                            | 588                   | 0.6               | 1.2                | 2.4                | 375                        | O                            | F                               | Fe                   |
| 543a                      | <i>Mollinedia</i> sp. <sup>y</sup>                                                        | Yes            | Monimiaceae              | D                | 40              | - <sup>p</sup>   | P                            | 980                   | 1.0               | 1.9                | 3.9                | 341                        | O                            | B <sup>c</sup>                  | Fe                   |
| 543b                      | <i>Mollinedia</i> sp. <sup>y</sup>                                                        | Yes            | Monimiaceae              | D                | 40              | - <sup>p</sup>   | P                            | 1,176                 | 1.2               | 2.4                | 4.7                | 341                        | O                            | B <sup>c</sup>                  | Fe                   |
| 544                       | <i>Mollinedia</i> sp. <sup>y</sup>                                                        | Yes            | Monimiaceae              | D                | 100             | - <sup>p</sup>   | P                            | 1,078                 | 1.1               | 2.2                | 4.4                | 341                        | O                            | B <sup>c</sup>                  | Fe                   |
| 545                       | <i>Mollinedia</i> sp. <sup>y</sup>                                                        | Yes            | Monimiaceae              | D                | 16              | - <sup>p</sup>   | P                            | 1,470                 | 1.5               | 2.9                | 5.9                | 341                        | O                            | B <sup>c</sup>                  | Fe                   |
| 546c                      | <i>Musa acuminata</i> Colla <sup>h</sup>                                                  | No             | Annonaceae               | M                | 22 <sup>o</sup> | 2                | P                            | 588                   | 0.6               | 1.1                | 2.2                | 335                        | O                            | <i>Citrus</i> <sup>e</sup>      | FC:PI                |
| 547b                      | <i>Musa balbisiana</i> Colla                                                              | No             | Musaceae                 | M                | 22 <sup>o</sup> | 2                | P                            | 490                   | 0.5               | 1.0                | 2.1                | 335                        | O                            | <i>Citrus</i> <sup>e</sup>      | FC:PI                |

|      |                                                               |     |               |   |        |     |   |                    |     |      |      |     |   |                            |       |
|------|---------------------------------------------------------------|-----|---------------|---|--------|-----|---|--------------------|-----|------|------|-----|---|----------------------------|-------|
| 548  | <i>Musa schizocarpa</i> Simmonds                              | No  | Musaceae      | M | 22°    | 2   | P | 588                | 0.6 | 1.2  | 2.4  | 335 | O | <i>Citrus</i> <sup>e</sup> | FC:PI |
| 549  | <i>Musa textilis</i> Nee                                      | No  | Musaceae      | M | 20°    | 2   | P | 588                | 0.6 | 1.3  | 2.5  | 335 | O | <i>Citrus</i> <sup>e</sup> | FC:PI |
| 550  | <i>Myristica dactyloides</i> Gaertner.                        | Yes | Myristicaceae | D | 48     | —P  | P | 1,372              | 1.4 | 2.9  | 5.8  | 341 | O | B <sup>c</sup>             | Fe    |
| 551  | <i>Myristica fragrans</i> Houtt.                              | Yes | Myristicaceae | D | 48     | —P  | P | 1,176              | 1.2 | 2.4  | 4.8  | 341 | O | B <sup>c</sup>             | Fe    |
| 552  | <i>Neofinetia falcata</i> (Thunb.) H.H.Hu.                    | No  | Orchidaceae   | M | 38°    | —P  | P | 2,317 <sup>1</sup> | 2.4 | 4.7  | 9.4  | 307 | O | <i>Gallus</i> <sup>f</sup> | FC:PI |
| 553  | <i>Odontoglossum spectatissimum</i> Lindl.                    | Yes | Orchidaceae   | M | —      | —P  | P | 4,214              | 4.3 | 8.6  | 17.2 | 377 | O | F                          | Fe    |
| 554  | <i>Odontoglossum wyattianum</i> Gurney Wilson                 | Yes | Orchidaceae   | M | —      | —P  | P | 3,920              | 4.0 | 7.9  | 15.8 | 377 | O | F                          | Fe    |
| 555  | <i>Oncidium</i> aff. <i>cimiciferum</i> Rehb.f.               | No  | Orchidaceae   | M | —      | —P  | P | 3,332              | 3.4 | 6.9  | 13.7 | 377 | O | F                          | Fe    |
| 556  | <i>Oncidium aloisii</i> Schltr.                               | No  | Orchidaceae   | M | —      | —P  | P | 3,038              | 3.1 | 6.1  | 12.2 | 377 | O | F                          | Fe    |
| 557b | <i>Oncidium ampliatum</i> Lindl.                              | Yes | Orchidaceae   | M | 44°    | —P  | P | 9,310              | 9.5 | 19.1 | 38.1 | 377 | O | F                          | Fe    |
| 557c | <i>Oncidium ampliatum</i> Lindl.                              | No  | Orchidaceae   | M | 44°    | —P  | P | 2,342 <sup>1</sup> | 2.4 | 4.8  | 9.6  | 307 | O | <i>Gallus</i> <sup>f</sup> | FC:PI |
| 558  | <i>Oncidium ansiferum</i> Rehb.f.                             | Yes | Orchidaceae   | M | 56°    | —P  | P | 3,038              | 3.1 | 6.3  | 12.6 | 377 | O | F                          | Fe    |
| 559  | <i>Oncidium baueri</i> Lindl.                                 | Yes | Orchidaceae   | M | 56°    | —P  | P | 4,410              | 4.5 | 8.9  | 17.9 | 377 | O | F                          | Fe    |
| 560  | <i>Oncidium bracteatum</i> Warsz. ex Rehb.f.                  | Yes | Orchidaceae   | M | —      | —P  | P | 3,234              | 3.3 | 6.6  | 13.1 | 377 | O | F                          | Fe    |
| 561  | <i>Oncidium caediochilum</i> Lindl.                           | Yes | Orchidaceae   | M | —      | —P  | P | 3,038              | 3.1 | 6.2  | 12.4 | 377 | O | F                          | Fe    |
| 562  | <i>Oncidium crispum</i> Lodd.                                 | Yes | Orchidaceae   | M | 56°    | —P  | P | 1,862              | 1.9 | 3.9  | 7.7  | 377 | O | F                          | Fe    |
| 563  | <i>Oncidium endocharis</i> Rehb.f.                            | Yes | Orchidaceae   | M | —      | —P  | P | 4,508              | 4.6 | 9.2  | 18.4 | 377 | O | F                          | Fe    |
| 564  | <i>Oncidium excavatum</i> Lindl.                              | Yes | Orchidaceae   | M | c.50   | —P  | P | 2,058              | 2.1 | 4.3  | 8.5  | 377 | O | F                          | Fe    |
| 565  | <i>Oncidium floridanum</i> Ames                               | Yes | Orchidaceae   | M | 56°    | —P  | P | 3,234              | 3.3 | 6.6  | 13.2 | 377 | O | F                          | Fe    |
| 566  | <i>Oncidium globuliferum</i> H.B.&K.                          | Yes | Orchidaceae   | M | 56°    | —P  | P | 3,136              | 3.2 | 6.4  | 12.8 | 377 | O | F                          | Fe    |
| 567  | <i>Oncidium loxense</i> Lindl.                                | Yes | Orchidaceae   | M | —      | —P  | P | 2,744              | 2.8 | 5.6  | 11.2 | 377 | O | F                          | Fe    |
| 568  | <i>Oncidium marsshallianum</i> Rehb.f.                        | Yes | Orchidaceae   | M | 56-58° | —P  | P | 1,764              | 1.8 | 3.6  | 7.3  | 377 | O | F                          | Fe    |
| 569  | <i>Oncidium microchilum</i> Batem. ex Lindl.                  | Yes | Orchidaceae   | M | 36-67° | —P  | P | 4,802              | 4.9 | 9.8  | 19.5 | 377 | O | F                          | Fe    |
| 570  | <i>Oncidium ochmatochilum</i> Rehb.f.                         | Yes | Orchidaceae   | M | —      | —P  | P | 2,156              | 2.2 | 4.4  | 8.9  | 377 | O | F                          | Fe    |
| 571  | <i>Oncidium onustum</i> Lindl.                                | Yes | Orchidaceae   | M | 56     | 4   | P | 2,940              | 3.0 | 6.1  | 12.2 | 377 | O | F                          | Fe    |
| 572  | <i>Oncidium ornithorynchum</i> H.B.&K.                        | Yes | Orchidaceae   | M | 56°    | 2   | P | 2,842              | 2.9 | 5.8  | 11.5 | 377 | O | F                          | Fe    |
| 573  | <i>Oncidium ovatilabium</i> C.Schweinf.                       | Yes | Orchidaceae   | M | —      | —P  | P | 1,862              | 1.9 | 3.9  | 7.7  | 377 | O | F                          | Fe    |
| 574  | <i>Oncidium phymatochilum</i> Lindl.                          | Yes | Orchidaceae   | M | 56°    | —P  | P | 5,586              | 5.7 | 11.4 | 22.9 | 377 | O | F                          | Fe    |
| 575  | <i>Oncidium robustissimum</i> Rehb.f.                         | Yes | Orchidaceae   | M | 44°    | —P  | P | 2,744              | 2.8 | 5.7  | 11.3 | 377 | O | F                          | Fe    |
| 576a | <i>Oncidium sphacelatum</i> Lindl.                            | No  | Orchidaceae   | M | 56°    | —P  | P | 2,323 <sup>1</sup> | 2.4 | 4.7  | 9.4  | 307 | O | <i>Gallus</i> <sup>f</sup> | FC:PI |
| 576b | <i>Oncidium sphacelatum</i> Lindl.                            | Yes | Orchidaceae   | M | 56°    | —P  | P | 3,136              | 3.2 | 6.4  | 12.9 | 377 | O | F                          | Fe    |
| 577  | <i>Oncidium stenotis</i> Rehb.f.                              | Yes | Orchidaceae   | M | 56°    | —P  | P | 2,940              | 3.0 | 6.0  | 12.1 | 377 | O | F                          | Fe    |
| 578  | <i>Oncidium tricoctatum</i> (Kraenzl.) Garay                  | Yes | Orchidaceae   | M | —      | —P  | P | 1,960              | 2.0 | 4.1  | 8.1  | 377 | O | F                          | Fe    |
| 579a | <i>Oncidium trilobum</i> (Schltr.) Garay & Stacy <sup>1</sup> | Yes | Orchidaceae   | M | c.50°  | c.4 | P | 3,234              | 3.3 | 6.5  | 13.1 | 377 | O | F                          | Fe    |
| 579b | <i>Oncidium trilobum</i> (Schltr.) Garay & Stacy <sup>1</sup> | Yes | Orchidaceae   | M | c.50°  | c.4 | P | 3,528              | 3.6 | 7.3  | 14.6 | 377 | O | F                          | Fe    |
| 580  | <i>Oncidium varuelum</i> Moir                                 | No  | Orchidaceae   | M | 63°    | —P  | P | 1,887 <sup>1</sup> | 2.0 | 3.9  | 7.8  | 307 | O | <i>Gallus</i> <sup>f</sup> | FC:PI |

APPENDIX. (continued, the superscript letters refer to notes concerning this table)

| Entry number <sup>g</sup> | Species                                                    | Voucher        | Family                | Monocot or dicot | Ploidy level (x) | 2n <sub>f</sub> | Life cycle type <sup>h</sup> | DNA amount             |         |         |         | Original ref. <sup>a</sup> | Present amount <sup>+</sup> | Standard species <sup>*,b1</sup> | Method <sup>†</sup> |
|---------------------------|------------------------------------------------------------|----------------|-----------------------|------------------|------------------|-----------------|------------------------------|------------------------|---------|---------|---------|----------------------------|-----------------------------|----------------------------------|---------------------|
|                           |                                                            |                |                       |                  |                  |                 |                              | IC (Mbp <sup>s</sup> ) | 1C (pg) | 2C (pg) | 4C (pg) |                            |                             |                                  |                     |
| 581                       | <i>Oncidium wentworthianum</i> ex Lindl.                   | Yes            | Orchidiaceae          | M                | — <sup>p</sup>   | 56 <sup>o</sup> | P                            | 2,842                  | 2.9     | 5.9     | 11.7    | 377                        | O                           | F                                | Fe                  |
| 582b                      | <i>Origanum vulgare</i> L.                                 | — <sup>m</sup> | Labiatae <sup>i</sup> | D                | 4                | 32 <sup>o</sup> | P                            | 784                    | 0.8     | 1.5     | 3.0     | 313                        | O                           | C <sup>d</sup>                   | Fe                  |
| 583b                      | <i>Oryza australiensis</i> Domin                           | No             | Gramineae             | M                | 2                | 24              | — <sup>q</sup>               | 980 <sup>i</sup>       | 1.0     | 2.0     | 3.9     | 351                        | O                           | <i>Gallus</i> <sup>f</sup>       | FC:PI               |
| 583c                      | <i>Oryza australiensis</i> Domin                           | No             | Gramineae             | M                | 2                | 24 <sup>o</sup> | — <sup>q</sup>               | 975                    | 1.0     | 2.0     | 4.0     | 365                        | O                           | <i>Gallus</i> <sup>f</sup>       | FC:PI               |
| 584                       | <i>Oryza brachyantha</i> A.Chevalier & Roehrich            | No             | Gramineae             | M                | 2                | 24              | B                            | 392 <sup>i</sup>       | 0.4     | 0.7     | 1.4     | 351                        | O                           | <i>Gallus</i> <sup>f</sup>       | FC:PI               |
| 585a                      | <i>Oryza eichingeri</i> Peter                              | No             | Gramineae             | M                | 2                | 24 <sup>o</sup> | — <sup>q</sup>               | 573                    | 0.6     | 1.2     | 2.3     | 365                        | O                           | <i>Gallus</i> <sup>f</sup>       | FC:PI               |
| 585b                      | <i>Oryza eichingeri</i> Peter                              | No             | Gramineae             | M                | 2                | 24              | B-P                          | 686 <sup>i</sup>       | 0.7     | 1.5     | 2.9     | 351                        | O                           | <i>Gallus</i> <sup>f</sup>       | FC:PI               |
| 586b                      | <i>Oryza glaberrima</i> Steud.                             | No             | Gramineae             | M                | 2                | 24 <sup>o</sup> | A                            | 372                    | 0.4     | 0.8     | 1.5     | 365                        | O                           | <i>Gallus</i> <sup>f</sup>       | FC:PI               |
| 586c                      | <i>Oryza glaberrima</i> Steud.                             | No             | Gramineae             | M                | 2                | 24              | A                            | 392 <sup>i</sup>       | 0.4     | 0.9     | 1.7     | 351                        | O                           | <i>Gallus</i> <sup>f</sup>       | FC:PI               |
| 587                       | <i>Oryza glumaepatula</i> Steud.                           | No             | Gramineae             | M                | 2                | 24              | — <sup>q</sup>               | 490 <sup>i</sup>       | 0.5     | 1.0     | 2.0     | 351                        | O                           | <i>Gallus</i> <sup>f</sup>       | FC:PI               |
| 588                       | <i>Oryza grandiglumis</i> Prodoehl                         | No             | Gramineae             | M                | 4                | 48 <sup>o</sup> | — <sup>q</sup>               | 975                    | 1.0     | 2.0     | 4.0     | 365                        | O                           | <i>Gallus</i> <sup>f</sup>       | FC:PI               |
| 589                       | <i>Oryza latifolia</i> <sup>1</sup>                        | No             | Gramineae             | M                | 4                | 48 <sup>o</sup> | — <sup>q</sup>               | 1,137                  | 1.2     | 2.3     | 4.6     | 365                        | O                           | <i>Gallus</i> <sup>f</sup>       | FC:PI               |
| 590c                      | <i>Oryza longistaminata</i> A.Chev. & Roehr.               | No             | Gramineae             | M                | 2                | 24              | P                            | 392 <sup>i</sup>       | 0.4     | 0.8     | 1.6     | 351                        | O                           | <i>Gallus</i> <sup>f</sup>       | FC:PI               |
| 590d                      | <i>Oryza longistaminata</i> A.Chev. & Roehr                | No             | Gramineae             | M                | 2                | 24 <sup>o</sup> | P                            | 382                    | 0.4     | 0.8     | 1.6     | 365                        | O                           | <i>Gallus</i> <sup>f</sup>       | FC:PI               |
| 591                       | <i>Oryza meridionalis</i> N.Q.Ng                           | No             | Gramineae             | M                | 2                | 24              | A-B                          | 490 <sup>i</sup>       | 0.5     | 1.0     | 2.0     | 351                        | O                           | <i>Gallus</i> <sup>f</sup>       | FC:PI               |
| 592b                      | <i>Oryza minuta</i> J & C.Presl                            | No             | Gramineae             | M                | 4                | 48 <sup>o</sup> | — <sup>q</sup>               | 1,142                  | 1.2     | 2.3     | 4.7     | 365                        | O                           | <i>Gallus</i> <sup>f</sup>       | FC:PI               |
| 593b                      | <i>Oryza officinalis</i> Wall & Watt.                      | No             | Gramineae             | M                | 2                | 24 <sup>o</sup> | P                            | 559                    | 0.6     | 1.1     | 2.3     | 365                        | O                           | <i>Gallus</i> <sup>f</sup>       | FC:PI               |
| 593c                      | <i>Oryza officinalis</i> Wall. & Watt.                     | No             | Gramineae             | M                | 2                | 24              | P                            | 686 <sup>i</sup>       | 0.7     | 1.5     | 2.9     | 351                        | O                           | <i>Gallus</i> <sup>f</sup>       | FC:PI               |
| 594                       | <i>Oryza punctata</i> Kotschy ex Steud.                    | No             | Gramineae             | M                | 2                | 24              | A-B                          | 588 <sup>i</sup>       | 0.6     | 1.1     | 2.2     | 351                        | O                           | <i>Gallus</i> <sup>f</sup>       | FC:PI               |
| 595b                      | <i>Oryza ridleyi</i> Hook <sup>h</sup>                     | No             | Gramineae             | M                | 4                | 48 <sup>o</sup> | — <sup>q</sup>               | 642                    | 0.7     | 1.3     | 2.6     | 365                        | O                           | <i>Gallus</i> <sup>f</sup>       | FC:PI               |
| 595c                      | <i>Oryza ridleyi</i> Hook <sup>h</sup>                     | No             | Gramineae             | M                | 4                | 48 <sup>o</sup> | — <sup>q</sup>               | 946                    | 1.0     | 1.9     | 3.9     | 365                        | O                           | <i>Gallus</i> <sup>f</sup>       | FC:PI               |
| 596c                      | <i>Oryza rufipogon</i> Griff.                              | No             | Gramineae             | M                | 2                | 24              | A-P                          | 490 <sup>i</sup>       | 0.5     | 1.0     | 1.9     | 351                        | O                           | <i>Gallus</i> <sup>f</sup>       | FC:PI               |
| 597n                      | <i>Oryza sativa</i> L. ssp. <i>indica</i> cv. IR36         | No             | Gramineae             | M                | 2                | 24              | A                            | 490 <sup>i</sup>       | 0.5     | 0.9     | 1.9     | 351                        | O                           | <i>Gallus</i> <sup>f</sup>       | FC:PI               |
| 597o                      | <i>Oryza sativa</i> L. ssp. <i>indica</i> cv. IR36         | No             | Gramineae             | M                | 2                | 24 <sup>o</sup> | A                            | 441                    | 0.4     | 0.9     | 1.8     | 365                        | O                           | <i>Gallus</i> <sup>f</sup>       | FC:PI               |
| 597p                      | <i>Oryza sativa</i> L. ssp. <i>japonica</i> cv. Yukihikari | No             | Gramineae             | M                | 2                | 24 <sup>o</sup> | A                            | 431                    | 0.4     | 0.9     | 1.8     | 365                        | O                           | <i>Gallus</i> <sup>f</sup>       | FC:PI               |
| 597q                      | <i>Oryza sativa</i> L. ssp. <i>japonica</i> cv. Nipponbare | No             | Gramineae             | M                | 2                | 24              | A                            | 490 <sup>i</sup>       | 0.5     | 0.9     | 1.8     | 351                        | O                           | <i>Gallus</i> <sup>f</sup>       | FC:PI               |
| 598                       | <i>Oxalis corniculata</i> L. var. <i>rubra</i>             | Yes            | Oxalidiaceae          | D                | — <sup>p</sup>   | — <sup>n</sup>  | P                            | 1,470                  | 1.5     | 2.9     | 5.8     | 375                        | O                           | F                                | Fe                  |
| 599                       | <i>Paeonia anomala</i> L.                                  | Yes            | Paeoniaceae           | D                | 2                | 10              | P                            | 18,659                 | 19.0    | 38.1    | 76.2    | 374                        | O                           | B                                | Fe                  |
| 600                       | <i>Paeonia bakeri</i> Lynch                                | Yes            | Paeoniaceae           | D                | 4                | 20              | P                            | 24,402                 | 24.9    | 49.8    | 99.5    | 374                        | O                           | B                                | Fe                  |
| 601                       | <i>Paeonia californica</i> <sup>1</sup>                    | Yes            | Paeoniaceae           | D                | 2                | 10              | P                            | 16,366                 | 16.7    | 33.5    | 67.0    | 374                        | O                           | B                                | Fe                  |
| 602                       | <i>Paeonia caucasica</i> Schipczinsky                      | Yes            | Paeoniaceae           | D                | 2                | 10              | P                            | 15,974                 | 16.3    | 32.6    | 65.2    | 374                        | O                           | B                                | Fe                  |
| 603                       | <i>Paeonia chusii</i> F.C.Stern & W.T.Stearn               | Yes            | Paeoniaceae           | D                | 4                | 20              | P                            | 28,374                 | 29.0    | 57.9    | 115.8   | 374                        | O                           | B                                | Fe                  |



|      |                                                                 |     |             |   |                 |                |   |        |      |      |       |                   |   |                                              |       |
|------|-----------------------------------------------------------------|-----|-------------|---|-----------------|----------------|---|--------|------|------|-------|-------------------|---|----------------------------------------------|-------|
| 604  | <i>Paeonia delavayi</i> <sup>1</sup>                            | Yes | Paeoniaceae | D | 10              | 2              | P | 14,382 | 14.7 | 29.4 | 58.7  | 374               | O | B                                            | Fe    |
| 605  | <i>Paeonia hybrida</i>                                          | Yes | Paeoniaceae | D | 10              | 2              | P | 17,020 | 17.4 | 34.7 | 69.5  | 374               | O | B                                            | Fe    |
| 606  | <i>Paeonia lutea</i> Delavay ex Franchet                        | Yes | Paeoniaceae | D | 10              | 2              | P | 15,680 | 16.0 | 32.1 | 64.2  | 374               | O | B                                            | Fe    |
| 607a | <i>Paeonia mascula</i> (L.) Mill ssp. <i>mascula</i>            | Yes | Paeoniaceae | D | 10              | 2              | P | 17,444 | 17.8 | 35.5 | 71.0  | 374               | O | B                                            | Fe    |
| 607b | <i>Paeonia mascula</i> (L.) Mill ssp. <i>triternata</i>         | Yes | Paeoniaceae | D | 10              | 2              | P | 15,288 | 15.6 | 31.2 | 62.4  | 374               | O | B                                            | Fe    |
| 608  | <i>Paeonia mlkosewitschi</i> Lomakin                            | Yes | Paeoniaceae | D | 10              | 2              | P | 15,876 | 16.2 | 32.3 | 64.7  | 374               | O | B                                            | Fe    |
| 609  | <i>Paeonia officinalis</i> ssp. <i>officinalis</i>              | Yes | Paeoniaceae | D | 20              | 4              | P | 26,362 | 26.9 | 53.8 | 107.6 | 374               | O | B                                            | Fe    |
| 610  | <i>Paeonia peregrina</i> Miller                                 | Yes | Paeoniaceae | D | 20              | 4              | P | 25,970 | 26.5 | 53.0 | 105.9 | 374               | O | B                                            | Fe    |
| 611  | <i>Paeonia rockii</i> (Haw & Laeuner) Hong Tao & J.J.Li         | Yes | Paeoniaceae | D | 10              | 2              | P | 15,148 | 15.5 | 30.9 | 61.8  | 374               | O | B                                            | Fe    |
| 612  | <i>Paeonia tenuifolia</i> L.                                    | Yes | Paeoniaceae | D | 10              | 2              | P | 16,268 | 16.6 | 33.1 | 66.2  | 374               | O | B                                            | Fe    |
| 613  | <i>Paeonia veitchii</i> Lynch                                   | Yes | Paeoniaceae | D | 10              | 2              | P | 17,032 | 17.4 | 34.8 | 69.5  | 374               | O | B                                            | Fe    |
| 614  | <i>Panicum dichotomiflorum</i> Michx.                           | Yes | Gramineae   | M | 54              | 6              | A | 1,666  | 1.7  | 3.4  | 6.7   | 375               | O | F                                            | Fe    |
| 615a | <i>Panicum virgatum</i> L. population SWG-24 <sup>1</sup> & ac  | No  | Gramineae   | M | 36              | 4              | P | 1,372  | 1.4  | 2.7  | 5.4   | 331               | O | Lycopers. <sup>c</sup> & Ictal. <sup>f</sup> | FC:PI |
| 615b | <i>Panicum virgatum</i> L. population PMT-279 <sup>1</sup> & ac | No  | Gramineae   | M | 36              | 4              | P | 1,666  | 1.7  | 3.3  | 6.6   | 331               | O | Lycopers. <sup>c</sup> & Ictal. <sup>f</sup> | FC:PI |
| 615c | <i>Panicum virgatum</i> L. <sup>i</sup>                         | No  | Gramineae   | M | 36              | 4              | P | 1,470  | 1.5  | 3.1  | 5.9   | 345 <sup>am</sup> | O | F <sup>c</sup>                               | FC:PI |
| 615d | <i>Panicum virgatum</i> L. <sup>i</sup>                         | No  | Gramineae   | M | 36 <sup>o</sup> | 4              | P | 1,372  | 1.4  | 2.8  | 5.6   | 368 <sup>at</sup> | O | F <sup>c</sup>                               | FC:PI |
| 615e | <i>Panicum virgatum</i> L. <sup>i</sup>                         | No  | Gramineae   | M | 36 <sup>o</sup> | 4              | P | 1,666  | 1.7  | 3.6  | 6.9   | 368 <sup>at</sup> | O | F <sup>c</sup>                               | FC:PI |
| 616a | <i>Panicum virgatum</i> L. population SWG-10p <sup>1</sup> & ac | No  | Gramineae   | M | 54              | 6              | P | 1,960  | 2.0  | 3.9  | 7.8   | 331               | O | Lycopers. <sup>c</sup> & Ictal. <sup>f</sup> | FC:PI |
| 616b | <i>Panicum virgatum</i> L. population SWG-26 <sup>1</sup> & ac  | No  | Gramineae   | M | 54              | 6              | P | 2,058  | 2.1  | 4.2  | 8.4   | 331               | O | Lycopers. <sup>c</sup> & Ictal. <sup>f</sup> | FC:PI |
| 617a | <i>Panicum virgatum</i> L. population SWG-10p <sup>1</sup> & ac | No  | Gramineae   | M | 72              | 8              | P | 2,352  | 2.4  | 4.7  | 9.4   | 331               | O | Lycopers. <sup>c</sup> & Ictal. <sup>f</sup> | FC:PI |
| 617b | <i>Panicum virgatum</i> L. population SWG-6 <sup>1</sup> & ac   | No  | Gramineae   | M | 72              | 8              | P | 2,940  | 3.0  | 6.0  | 12.0  | 331               | O | Lycopers. <sup>c</sup> & Ictal. <sup>f</sup> | FC:PI |
| 617c | <i>Panicum virgatum</i> L. <sup>i</sup>                         | No  | Gramineae   | M | 72              | 8              | P | 2,989  | 3.1  | 6.1  | 12.2  | 345 <sup>am</sup> | O | F <sup>c</sup>                               | FC:PI |
| 617d | <i>Panicum virgatum</i> L. <sup>i</sup>                         | No  | Gramineae   | M | 72 <sup>o</sup> | 8              | P | 2,842  | 2.9  | 5.7  | 11.4  | 368 <sup>at</sup> | O | F <sup>c</sup>                               | FC:PI |
| 617e | <i>Panicum virgatum</i> L. <sup>i</sup>                         | No  | Gramineae   | M | 72 <sup>o</sup> | 8              | P | 3,136  | 3.2  | 6.5  | 12.9  | 368 <sup>at</sup> | O | F <sup>c</sup>                               | FC:PI |
| 618  | <i>Paphiopedilum adductum</i> J.H.Asher                         | No  | Orchidaceae | M | — <sup>n</sup>  | — <sup>p</sup> | P | 26,460 | 27.0 | 54.0 | 108.1 | 377               | O | B                                            | Fe    |
| 619  | <i>Paphiopedilum armeniacum</i> S.C.Chen & F.Y.Liu              | No  | Orchidaceae | M | — <sup>n</sup>  | — <sup>p</sup> | P | 20,678 | 21.1 | 42.2 | 84.4  | 377               | O | B                                            | Fe    |
| 620  | <i>Paphiopedilum bullenianum</i> Pfitz. var. <i>celebesense</i> | Yes | Orchidaceae | M | 40              | — <sup>p</sup> | P | 25,284 | 25.8 | 51.7 | 103.4 | 377               | O | B                                            | Fe    |
| 621  | <i>Paphiopedilum citiolare</i> Pfitz.                           | Yes | Orchidaceae | M | 32 <sup>o</sup> | — <sup>p</sup> | P | 29,890 | 30.5 | 61.0 | 122.0 | 377               | O | B                                            | Fe    |
| 622  | <i>Paphiopedilum dianthum</i> T.Tang & F.T.Wang                 | Yes | Orchidaceae | M | 28-30           | — <sup>p</sup> | P | 35,182 | 35.9 | 71.8 | 143.6 | 377               | O | B                                            | Fe    |
| 623  | <i>Paphiopedilum exul</i> Rolfe                                 | No  | Orchidaceae | M | 26 <sup>o</sup> | — <sup>p</sup> | P | 16,170 | 16.5 | 33.0 | 66.0  | 377               | O | B                                            | Fe    |
| 624  | <i>Paphiopedilum haynaldianum</i> (Rehb.f.) Stein               | Yes | Orchidaceae | M | 26 <sup>o</sup> | — <sup>p</sup> | P | 22,442 | 22.9 | 45.7 | 91.4  | 377               | O | B                                            | Fe    |

APPENDIX. (continued, the superscript letters refer to notes concerning this table)

| Entry number <sup>g</sup> | Species                                                                                 | Voucher        | Family                 | Monocot or dicot | Ploidy level (x) | Life cycle type <sup>h</sup> | DNA amount             |         |         |         | Original ref. <sup>a</sup> | Present amount <sup>†</sup> | Standard species* <sup>b1</sup> | Method <sup>††</sup> |
|---------------------------|-----------------------------------------------------------------------------------------|----------------|------------------------|------------------|------------------|------------------------------|------------------------|---------|---------|---------|----------------------------|-----------------------------|---------------------------------|----------------------|
|                           |                                                                                         |                |                        |                  |                  |                              | IC (Mbp <sup>g</sup> ) | 1C (pg) | 2C (pg) | 4C (pg) |                            |                             |                                 |                      |
| 625                       | <i>Paphiopedilum javanicum</i> Pfitz.                                                   | No             | Orchidaceae            | M                | 40               | P                            | 24,794                 | 25.3    | 50.6    | 101.2   | 377                        | O                           | B                               | Fe                   |
| 626                       | <i>Paphiopedilum lawrenceanum</i> Pfitz.                                                | No             | Orchidaceae            | M                | 40               | P                            | 25,578                 | 26.1    | 52.3    | 104.5   | 377                        | O                           | B                               | Fe                   |
| 627                       | <i>Paphiopedilum lowii</i> (Lindl.) Stein                                               | Yes            | Orchidaceae            | M                | 26               | P                            | 24,010                 | 24.5    | 49.1    | 98.1    | 377                        | O                           | B                               | Fe                   |
| 628                       | <i>Paphiopedilum purpuratum</i> (Lindl.) Stein                                          | — <sup>m</sup> | Orchidaceae            | M                | 40               | P                            | 26,558                 | 27.1    | 54.3    | 108.5   | 377                        | O                           | B                               | Fe                   |
| 629b                      | <i>Paspopyrum smithii</i> (Rydb.) A.Löve<br>cv. Flintlock (= <i>Agropyron smithii</i> ) | No             | Gramineae <sup>d</sup> | M                | 56               | 8                            | 17,346                 | 17.7    | 35.4    | 70.8    | 343 <sup>al</sup>          | O                           | A <sup>c</sup> & F <sup>c</sup> | FC:PI                |
| 630                       | <i>Paspalum conjugatum</i> <sup>l</sup>                                                 | Yes            | Gramineae              | M                | — <sup>n</sup>   | A-P                          | 1,470                  | 1.5     | 3.1     | 6.1     | 375                        | O                           | F                               | Fe                   |
| 631                       | <i>Pennisetum alopecuroides</i> L.                                                      | Yes            | Gramineae              | M                | 18               | 2                            | 980                    | 1.0     | 1.9     | 3.8     | 308                        | O                           | Medic. <sup>e</sup>             | FC:EB                |
| 632b                      | <i>Pennisetum glaucum</i> R.Br.                                                         | Yes            | Gramineae              | M                | 14               | 2                            | 2,352                  | 2.4     | 4.7     | 9.4     | 308                        | O                           | Medic. <sup>e</sup>             | FC:EB                |
| 633                       | <i>Pennisetum hohenackeri</i> Hochst. ex Steud                                          | Yes            | Gramineae              | M                | 18               | 2                            | 882                    | 0.9     | 1.7     | 3.4     | 308                        | O                           | Medic. <sup>e</sup>             | FC:EB                |
| 634                       | <i>Pennisetum mezianum</i> Leek, Abstamm. & Heim.                                       | Yes            | Gramineae              | M                | 32               | 4                            | 1,470                  | 1.5     | 3.0     | 6.0     | 308                        | O                           | Medic. <sup>e</sup>             | FC:EB                |
| 635                       | <i>Pennisetum mollissimum</i> Hochst.                                                   | Yes            | Gramineae              | M                | 14               | 2                            | 2,254                  | 2.3     | 4.5     | 9.0     | 308                        | O                           | Medic. <sup>e</sup>             | FC:EB                |
| 636                       | <i>Pennisetum orientale</i> L.                                                          | Yes            | Gramineae              | M                | 36               | 4                            | 1,862                  | 1.9     | 3.8     | 7.6     | 308                        | O                           | Medic. <sup>e</sup>             | FC:EB                |
| 637                       | <i>Pennisetum pedicellatum</i> Trin.                                                    | Yes            | Gramineae              | M                | 36               | 4                            | 2,156                  | 2.2     | 4.4     | 8.8     | 375                        | O                           | F                               | Fe                   |
| 638                       | <i>Pennisetum pedicellatum</i> Trin.                                                    | Yes            | Gramineae              | M                | 54               | 6                            | 2,744                  | 2.8     | 5.6     | 11.2    | 308                        | O                           | Medic. <sup>e</sup>             | FC:EB                |
| 639                       | <i>Pennisetum polystachyon</i> Schult                                                   | Yes            | Gramineae              | M                | 36               | 4                            | 2,058                  | 2.1     | 4.3     | 8.5     | 375                        | O                           | F                               | Fe                   |
| 640                       | <i>Pennisetum polystachyon</i> Schult                                                   | Yes            | Gramineae              | M                | 54               | 6                            | 2,842                  | 2.9     | 5.7     | 11.4    | 308                        | O                           | Medic. <sup>e</sup>             | FC:EB                |
| 641b                      | <i>Pennisetum purpureum</i> Schum.                                                      | Yes            | Gramineae              | M                | 28               | 4                            | 2,254                  | 2.3     | 4.6     | 9.2     | 308                        | O                           | Medic. <sup>e</sup>             | FC:EB                |
| 642                       | <i>Pennisetum ramosum</i> L.                                                            | Yes            | Gramineae              | M                | 10               | 2                            | 1,960                  | 2.0     | 4.0     | 8.0     | 308                        | O                           | Medic. <sup>e</sup>             | FC:EB                |
| 643                       | <i>Pennisetum schweinfurthii</i> Pilg.                                                  | Yes            | Gramineae              | M                | 14               | 2                            | 2,450                  | 2.5     | 5.0     | 10.0    | 308                        | O                           | Medic. <sup>e</sup>             | FC:EB                |
| 644                       | <i>Pennisetum setaceum</i> (Forsk.) Chiov.                                              | Yes            | Gramineae              | M                | 27               | 3                            | 1,372                  | 1.4     | 2.8     | 5.6     | 308                        | O                           | Medic. <sup>e</sup>             | FC:EB                |
| 645                       | <i>Pennisetum setaceum</i> (Forsk.) Chiov.                                              | Yes            | Gramineae              | M                | 54               | 6                            | 2,646                  | 2.7     | 5.3     | 10.6    | 308                        | O                           | Medic. <sup>e</sup>             | FC:EB                |
| 646                       | <i>Pennisetum squamulatum</i> Fresen.                                                   | Yes            | Gramineae              | M                | 54               | 6                            | 4,704                  | 4.8     | 9.6     | 19.2    | 308                        | O                           | Medic. <sup>e</sup>             | FC:EB                |
| 647                       | <i>Pennisetum villosum</i> L.                                                           | Yes            | Gramineae              | M                | 36               | 4                            | 1,764                  | 1.8     | 3.5     | 7.0     | 308                        | O                           | Medic. <sup>e</sup>             | FC:EB                |
| 648                       | <i>Pennisetum violaceum</i> Rich.                                                       | Yes            | Gramineae              | M                | 14               | 2                            | 2,254                  | 2.3     | 4.5     | 9.0     | 308                        | O                           | Medic. <sup>e</sup>             | FC:EB                |
| 649                       | <i>Peperomia blanda</i> H.B. & K.                                                       | Yes            | Piperaceae             | D                | 22               | 2                            | 1,568                  | 1.6     | 3.1     | 6.2     | 341                        | O                           | B <sup>c</sup>                  | Fe                   |
| 650                       | <i>Peperomia fenzei</i> Regel.                                                          | Yes            | Piperaceae             | D                | 44               | 4                            | 1,960                  | 2.0     | 4.0     | 8.0     | 341                        | O                           | B <sup>c</sup>                  | Fe                   |
| 651                       | <i>Peperomia glabella</i> A.Dieter                                                      | Yes            | Piperaceae             | D                | 22               | 2                            | 1,666                  | 1.7     | 3.3     | 6.7     | 341                        | O                           | B <sup>c</sup>                  | Fe                   |
| 652                       | <i>Peperomia griseoargantia</i> Yunker                                                  | Yes            | Piperaceae             | D                | 22               | 2                            | 588                    | 0.6     | 1.2     | 2.5     | 341                        | O                           | B <sup>c</sup>                  | Fe                   |
| 653                       | <i>Peperomia longispicata</i> C.DC.                                                     | Yes            | Piperaceae             | D                | 66               | 6                            | 3,920                  | 4.0     | 7.9     | 15.8    | 341                        | O                           | B <sup>c</sup>                  | Fe                   |
| 654                       | <i>Peperomia magnoliaefolia</i> A.Dieter                                                | Yes            | Piperaceae             | D                | 22               | 2                            | 1,372                  | 1.4     | 2.7     | 5.4     | 341                        | O                           | B <sup>c</sup>                  | Fe                   |
| 655                       | <i>Peperomia metallica</i> Lind. & Rodrig.                                              | Yes            | Piperaceae             | D                | 33               | 3                            | 3,038                  | 3.1     | 6.2     | 12.3    | 341                        | O                           | B <sup>c</sup>                  | Fe                   |

|      |                                                                                      |                |                          |   |                 |                |   |                    |     |      |      |                   |   |                                 |                |
|------|--------------------------------------------------------------------------------------|----------------|--------------------------|---|-----------------|----------------|---|--------------------|-----|------|------|-------------------|---|---------------------------------|----------------|
| 656b | <i>Peperomia obtusifolia</i> A. Dieter.                                              | Yes            | Piperaceae               | D | 22              | 2              | P | 1,176              | 1.2 | 2.4  | 4.7  | 341               | O | B <sup>c</sup>                  | Fe             |
| 657  | <i>Peristeria elata</i> Hook.                                                        | No             | Orchidaceae              | M | 40 <sup>o</sup> | — <sup>p</sup> | P | 4,577 <sup>t</sup> | 4.7 | 9.3  | 18.6 | 307               | O | <i>Gallus</i> <sup>f</sup>      | FC:PI          |
| 658b | <i>Persea americana</i> Miller.                                                      | Yes            | Lauraceae                | D | 24              | 2              | P | 1,176              | 1.2 | 2.3  | 4.6  | 341               | O | B <sup>c</sup>                  | Fe             |
| 659  | <i>Persea indica</i> (L.) Sprengel.                                                  | Yes            | Lauraceae                | D | 24              | 2              | P | 1,666              | 1.7 | 3.3  | 6.6  | 341               | O | B <sup>c</sup>                  | Fe             |
| 660c | <i>Petroselinum crispum</i> (Mill.) Nym.<br>ex A. W. Hill                            | Yes            | Umbelliferae             | D | 22 <sup>o</sup> | 2              | B | 2,156              | 2.2 | 4.5  | 8.9  | 346               | O | — <sup>y</sup>                  | FC:PI          |
| 661b | <i>Phaius tankervilleae</i> (Banks) Bl.                                              | No             | Orchidaceae              | M | 46 <sup>o</sup> | — <sup>p</sup> | P | 5,576 <sup>t</sup> | 5.7 | 11.4 | 22.8 | 307               | O | <i>Gallus</i> <sup>f</sup>      | FC:PI          |
| 662  | <i>Phalaenopsis equestris</i> (Shauer)<br>Rehb.f.                                    | No             | Orchidaceae              | M | 38 <sup>o</sup> | — <sup>p</sup> | P | 2,709 <sup>t</sup> | 2.8 | 5.5  | 11.0 | 307               | O | <i>Gallus</i> <sup>f</sup>      | FC:PI          |
| 663  | <i>Phalaenopsis luedemiamiana</i><br>Rehb.f.                                         | No             | Orchidaceae              | M | 38 <sup>o</sup> | — <sup>p</sup> | P | 4,239 <sup>t</sup> | 4.4 | 8.7  | 17.4 | 307               | O | <i>Gallus</i> <sup>f</sup>      | FC:PI          |
| 664b | <i>Phoenix dactylifera</i> L.                                                        | — <sup>m</sup> | Palmae                   | M | 36 <sup>o</sup> | 2              | P | 250                | 0.3 | 0.5  | 1.0  | 340               | O | — <sup>w</sup>                  | — <sup>t</sup> |
| 665  | <i>Phyllostachys nigra</i> Munro var.<br><i>henonis</i>                              | No             | Gramineae                | M | c.50            | — <sup>p</sup> | P | 2,646              | 2.7 | 5.4  | 10.8 | 377               | O | F                               | Fe             |
| 666  | <i>Phytolacca americana</i> L.                                                       | Yes            | Phytolaccaceae           | D | 36              | 4              | P | 1,470              | 1.5 | 2.9  | 5.9  | 354               | O | B                               | Fe             |
| 667  | <i>Phytolacca bogotensis</i> Humb.,<br><i>Bompl. &amp; Kunth</i>                     | Yes            | Phytolaccaceae           | D | 36              | 4              | P | 1,372              | 1.4 | 2.8  | 5.6  | 354               | O | B                               | Fe             |
| 668  | <i>Phytolacca dioica</i> L.                                                          | Yes            | Phytolaccaceae           | D | 36              | 4              | P | 1,274              | 1.3 | 2.6  | 5.2  | 354               | O | B                               | Fe             |
| 669  | <i>Phytolacca rivinoides</i> Kunth &<br>Bouché                                       | Yes            | Phytolaccaceae           | D | 36              | 4              | P | 1,274              | 1.3 | 2.6  | 5.2  | 354               | O | B                               | Fe             |
| 670  | <i>Phytolacca tetramera</i> Hauman                                                   | Yes            | Phytolaccaceae           | D | 72              | 8              | P | 2,744              | 2.8 | 5.6  | 11.1 | 354               | O | B                               | Fe             |
| 671  | <i>Prosopis alba</i> Griseb.                                                         | No             | Leguminosae <sup>k</sup> | D | 28              | 2              | P | 392                | 0.4 | 0.8  | 1.7  | 320               | O | <i>Gallus</i> <sup>f</sup>      | FC:PI          |
| 672  | <i>Prosopis chilensis</i> (Molina) Stuntz.                                           | No             | Leguminosae <sup>k</sup> | D | 28              | 2              | P | 392                | 0.4 | 0.9  | 1.7  | 320               | O | <i>Gallus</i> <sup>f</sup>      | FC:PI          |
| 673a | <i>Prosopis chilensis</i> (Molina) Stuntz. <sup>i</sup>                              | No             | Leguminosae <sup>k</sup> | D | 56              | 4              | P | 882                | 0.9 | 1.7  | 3.4  | 320               | O | <i>Gallus</i> <sup>f</sup>      | FC:PI          |
| 673b | <i>Prosopis chilensis</i> (Molina) Stuntz. <sup>i</sup>                              | No             | Leguminosae <sup>k</sup> | D | 56              | 4              | P | 882                | 0.9 | 1.7  | 3.5  | 320               | O | <i>Gallus</i> <sup>f</sup>      | FC:PI          |
| 674  | <i>Prosopis flexusa</i> DC.                                                          | No             | Leguminosae <sup>k</sup> | D | 28              | 2              | P | 392                | 0.4 | 0.8  | 1.6  | 320               | O | <i>Gallus</i> <sup>f</sup>      | FC:PI          |
| 675  | <i>Prosopis glandulosa</i> Torr.                                                     | No             | Leguminosae <sup>k</sup> | D | 28              | 2              | P | 392                | 0.4 | 0.8  | 1.7  | 320               | O | <i>Gallus</i> <sup>f</sup>      | FC:PI          |
| 676  | <i>Prosopis juliflora</i> (Swartz) DC. <sup>i</sup>                                  | No             | Leguminosae <sup>k</sup> | D | 28              | 2              | P | 392                | 0.4 | 0.9  | 1.7  | 320               | O | <i>Gallus</i> <sup>f</sup>      | FC:PI          |
| 677  | <i>Prosopis lampa</i> Willd.                                                         | No             | Leguminosae <sup>k</sup> | D | 28              | 2              | P | 392                | 0.4 | 0.9  | 1.7  | 320               | O | <i>Gallus</i> <sup>f</sup>      | FC:PI          |
| 678  | <i>Prosopis pallida</i> Willd.                                                       | No             | Leguminosae <sup>k</sup> | D | 28              | 2              | P | 392                | 0.4 | 0.8  | 1.7  | 320               | O | <i>Gallus</i> <sup>f</sup>      | FC:PI          |
| 679  | <i>Prosopis siliquas</i> (Willd.)                                                    | No             | Leguminosae <sup>k</sup> | D | 28              | 2              | P | 490                | 0.5 | 1.0  | 2.0  | 320               | O | <i>Gallus</i> <sup>f</sup>      | FC:PI          |
| 680c | <i>Prospero autumnale</i> s.l. (= <i>Scilla</i><br><i>autumnalis</i> ) <sup>3d</sup> | Yes            | Hyacinthaceae            | M | 12              | 2              | P | 5,782              | 5.9 | 11.9 | 23.8 | 321               | O | B                               | Fe             |
| 680d | <i>Prospero autumnale</i> s.l. (= <i>Scilla</i><br><i>autumnalis</i> ) <sup>3d</sup> | Yes            | Hyacinthaceae            | M | 12              | 2              | P | 6,174              | 6.3 | 12.7 | 25.3 | 321               | O | B                               | Fe             |
| 680e | <i>Prospero autumnale</i> s.l. (= <i>Scilla</i><br><i>autumnalis</i> ) <sup>3d</sup> | Yes            | Hyacinthaceae            | M | 14              | 2              | P | 4,214              | 4.3 | 8.5  | 17.0 | 321               | O | B                               | Fe             |
| 680f | <i>Prospero autumnale</i> s.l. (= <i>Scilla</i><br><i>autumnalis</i> ) <sup>3d</sup> | Yes            | Hyacinthaceae            | M | 14              | 2              | P | 7,350              | 7.5 | 15.0 | 30.0 | 321               | O | B                               | Fe             |
| 681  | <i>Prospero obtusifolium</i> (Poiret)<br>F. Speta (= <i>Scilla obtusifolia</i> )     | Yes            | Hyacinthaceae            | M | 8               | 2              | P | 4,704              | 4.8 | 9.7  | 19.4 | 321               | O | B                               | Fe             |
| 682  | <i>Psathyrostachys fragilis</i> (Boise)<br>Nevski                                    | No             | Gramineae <sup>i</sup>   | M | 14              | 2              | P | 8,232              | 8.4 | 16.8 | 33.6 | 343 <sup>al</sup> | O | A <sup>c</sup> & F <sup>c</sup> | FC:PI          |

APPENDIX. (continued, the superscript letters refer to notes concerning this table)

| Entry number <sup>a</sup> | Species                                                                   | Voucher        | Family                 | Monocot or dicot | Ploidy level (x) | Life cycle type <sup>§</sup> | DNA amount             |         |         |         | Original ref. <sup>a</sup> | Present amount <sup>†</sup> | Standard species* <sup>b1</sup> | Method <sup>††</sup> |
|---------------------------|---------------------------------------------------------------------------|----------------|------------------------|------------------|------------------|------------------------------|------------------------|---------|---------|---------|----------------------------|-----------------------------|---------------------------------|----------------------|
|                           |                                                                           |                |                        |                  |                  |                              | 1C (Mbp <sup>s</sup> ) | 1C (pg) | 2C (pg) | 4C (pg) |                            |                             |                                 |                      |
| 683                       | <i>Psathyrostachys juncea</i> (Fisher) Nevski <sup>1</sup>                | No             | Gramineae <sup>l</sup> | M                | 2                | P                            | 7,644                  | 7.8     | 15.6    | 31.2    | 343 <sup>al</sup>          | O                           | A <sup>c</sup> & F <sup>c</sup> | FC:PI                |
| 684                       | <i>Psathyrostachys stoloniformis</i> C.Baden <sup>1</sup>                 | No             | Gramineae <sup>l</sup> | M                | 2                | P                            | 8,820                  | 9.0     | 17.9    | 35.8    | 343 <sup>al</sup>          | O                           | A <sup>c</sup> & F <sup>c</sup> | FC:PI                |
| 685                       | <i>Pseudoroegneria geniculata</i> (Trin.) A.Löve <sup>1</sup>             | No             | Gramineae <sup>l</sup> | M                | 4                | P                            | 8,526                  | 8.7     | 17.5    | 35.0    | 343 <sup>al</sup>          | O                           | A <sup>c</sup> & F <sup>c</sup> | FC:PI                |
| 686                       | <i>Pseudoroegneria libanotica</i> (Hackel) D.R.Dewey                      | No             | Gramineae <sup>l</sup> | M                | 2                | P                            | 3,920                  | 4.0     | 8.0     | 15.9    | 343 <sup>al</sup>          | O                           | A <sup>c</sup> & F <sup>c</sup> | FC:PI                |
| 687a                      | <i>Pseudoroegneria spicata</i> (Pursh.) A.Löve                            | No             | Gramineae <sup>l</sup> | M                | 2                | P                            | 4,508                  | 4.6     | 9.1     | 18.2    | 343 <sup>al</sup>          | O                           | A <sup>c</sup> & F <sup>c</sup> | FC:PI                |
| 687b                      | <i>Pseudoroegneria spicata</i> (Pursh.) A.Löve ssp. <i>spicata</i>        | No             | Gramineae <sup>l</sup> | M                | 2                | P                            | 4,606                  | 4.7     | 9.4     | 18.9    | 343 <sup>al</sup>          | O                           | A <sup>c</sup> & F <sup>c</sup> | FC:PI                |
| 688                       | <i>Pseudoroegneria stipifolia</i> (Czern ex Nevski)                       | No             | Gramineae <sup>l</sup> | M                | 2                | P                            | 3,920                  | 4.0     | 8.0     | 16.0    | 343 <sup>al</sup>          | O                           | A <sup>c</sup> & F <sup>c</sup> | FC:PI                |
| 689a                      | <i>Pseudoroegneria strigosa</i> (M.Bieb) ssp. <i>aegilopoides</i>         | No             | Gramineae <sup>l</sup> | M                | 2                | P                            | 4,606                  | 4.7     | 9.5     | 18.9    | 343 <sup>al</sup>          | O                           | A <sup>c</sup> & F <sup>c</sup> | FC:PI                |
| 689b                      | <i>Pseudoroegneria strigosa</i> (M.Bieb)                                  | No             | Gramineae <sup>l</sup> | M                | 2                | P                            | 4,802                  | 4.9     | 9.7     | 19.4    | 343 <sup>al</sup>          | O                           | A <sup>c</sup> & F <sup>c</sup> | FC:PI                |
| 690                       | <i>Psilanthus ebracteolatus</i> Hiern.                                    | No             | Rubiaceae              | D                | 22 <sup>o</sup>  | P                            | 588                    | 0.6     | 1.1     | 2.3     | 309                        | O                           | <i>Gallus</i> <sup>f</sup>      | FC:PI                |
| 691                       | <i>Pueraria lobata</i> (Willd.) Ohwi                                      | No             | Leguminosae            | D                | 22               | P                            | 1,078                  | 1.1     | 2.2     | 4.4     | 347                        | O                           | G & J                           | FC:PI                |
| 692                       | <i>Quercus cerris</i> L.                                                  | Yes            | Fagaceae               | D                | 24               | P                            | 980                    | 1.0     | 1.9     | 3.8     | 323                        | O                           | <i>Petunia</i> <sup>f</sup>     | FC:EB                |
| 693                       | <i>Quercus coccifera</i> L.                                               | Yes            | Fagaceae               | D                | 24               | P                            | 980                    | 1.0     | 2.0     | 4.0     | 323                        | O                           | <i>Petunia</i> <sup>f</sup>     | FC:EB                |
| 694                       | <i>Quercus ilex</i> L.                                                    | Yes            | Fagaceae               | D                | 24               | P                            | 980                    | 1.0     | 2.0     | 4.0     | 323                        | O                           | <i>Petunia</i> <sup>f</sup>     | FC:EB                |
| 695c                      | <i>Quercus petraea</i> L. <sup>h</sup>                                    | Yes            | Fagaceae               | D                | 24               | P                            | 882                    | 0.9     | 1.9     | 3.8     | 323                        | O                           | <i>Petunia</i> <sup>f</sup>     | FC:EB                |
| 695d                      | <i>Quercus petraea</i> L.                                                 | — <sup>m</sup> | Fagaceae               | D                | 24               | P                            | 916 <sup>i</sup>       | 0.9     | 1.9     | 3.7     | 366                        | O                           | <i>Petunia</i> <sup>f</sup>     | FC:EB                |
| 696a                      | <i>Quercus pubescens</i> Willd.                                           | — <sup>m</sup> | Fagaceae               | D                | 24               | P                            | 911 <sup>i</sup>       | 0.9     | 1.9     | 3.7     | 366                        | O                           | <i>Petunia</i> <sup>f</sup>     | FC:EB                |
| 696b                      | <i>Quercus pubescens</i> Willd.                                           | Yes            | Fagaceae               | D                | 24               | P                            | 980                    | 1.0     | 1.9     | 3.8     | 323                        | O                           | <i>Petunia</i> <sup>f</sup>     | FC:EB                |
| 697a                      | <i>Quercus robur</i> L.                                                   | — <sup>m</sup> | Fagaceae               | D                | 24               | P                            | 902 <sup>i</sup>       | 0.9     | 1.8     | 3.7     | 366                        | O                           | <i>Petunia</i> <sup>f</sup>     | FC:EB                |
| 697b                      | <i>Quercus robur</i> L.                                                   | Yes            | Fagaceae               | D                | 24               | P                            | 882                    | 0.9     | 1.9     | 3.8     | 323                        | O                           | <i>Petunia</i> <sup>f</sup>     | FC:EB                |
| 698                       | <i>Quercus suber</i> L.                                                   | Yes            | Fagaceae               | D                | 24               | P                            | 980                    | 1.0     | 1.9     | 3.8     | 323                        | O                           | <i>Petunia</i> <sup>f</sup>     | FC:EB                |
| 699                       | <i>Reichardia dichotoma</i> Freyn                                         | Yes            | Compositae             | D                | 18               | P                            | 1,274                  | 1.3     | 2.6     | 5.1     | 356                        | O                           | <i>Lycopers</i> <sup>c</sup>    | FC:EB                |
| 700                       | <i>Reichardia gaditana</i> Cout.                                          | Yes            | Compositae             | D                | 16               | P                            | 784                    | 0.8     | 1.7     | 3.3     | 356                        | O                           | <i>Lycopers</i> <sup>c</sup>    | FC:EB                |
| 701                       | <i>Reichardia picroides</i> Roth                                          | Yes            | Compositae             | D                | 14               | A                            | 686                    | 0.7     | 1.5     | 3.0     | 356                        | O                           | <i>Lycopers</i> <sup>c</sup>    | FC:EB                |
| 702                       | <i>Rhynchosstele cervantesii</i> (La Llave & Lex.) Soto, Arenas & Salazar | No             | Orchidaceae            | M                | — <sup>n</sup>   | P                            | 3,626                  | 3.7     | 7.4     | 14.8    | 377                        | O                           | F                               | FC:EB                |
| 703                       | <i>Rhynchosstele cordata</i> (Lindl.) Soto, Arenas & Salazar              | Yes            | Orchidaceae            | M                | — <sup>n</sup>   | P                            | 3,822                  | 3.9     | 7.8     | 15.6    | 377                        | O                           | F                               | FC:EB                |
| 704b                      | <i>Rhynchosstylis gigantha</i> (Lindl.) Ridl.                             | No             | Orchidaceae            | M                | 38 <sup>o</sup>  | P                            | 2,950 <sup>i</sup>     | 3.0     | 6.0     | 12.0    | 307                        | O                           | <i>Gallus</i> <sup>f</sup>      | FC:PI                |
| 705b                      | <i>Rhynchosstylis retusa</i> (L.) Bl.                                     | No             | Orchidaceae            | M                | 38 <sup>o</sup>  | P                            | 4,728 <sup>i</sup>     | 4.9     | 9.7     | 19.4    | 307                        | O                           | <i>Gallus</i> <sup>f</sup>      | FC:PI                |

|      |                                                                                        |     |            |   |     |                |   |       |     |     |      |     |   |                        |       |
|------|----------------------------------------------------------------------------------------|-----|------------|---|-----|----------------|---|-------|-----|-----|------|-----|---|------------------------|-------|
| 706  | <i>Rollinia mucosa</i> (Jacq.) Ball.                                                   | Yes | Annonaceae | D | 42  | — <sup>p</sup> | P | 2,940 | 3.0 | 6.0 | 11.9 | 341 | O | B <sup>c</sup>         | Fe    |
| 707a | <i>Rosa</i> × <i>hybrida</i> cv. 'Ballerina'<br>(Polyantha class)                      | Yes | Rosaceae   | D | 14° | 2              | P | 578   | 0.6 | 1.2 | 2.4  | 346 | O | Petrosel. <sup>v</sup> | FC:PI |
| 707b | <i>Rosa</i> × <i>hybrida</i> cv. 'Felicite et Perpetue'<br>(Hybrid Sempervirens class) | Yes | Rosaceae   | D | 14° | 2              | P | 632   | 0.6 | 1.3 | 2.6  | 346 | O | Petrosel. <sup>v</sup> | FC:PI |
| 708a | <i>Rosa</i> × <i>hybrida</i> cv. 'Frensham'<br>(Floribunda class)                      | Yes | Rosaceae   | D | 21° | 3              | P | 877   | 0.9 | 1.8 | 3.6  | 346 | O | Petrosel. <sup>v</sup> | FC:PI |
| 708b | <i>Rosa</i> × <i>hybrida</i> cv. 'New Dawn'<br>(Large-flowered Climber class)          | Yes | Rosaceae   | D | 21° | 3              | P | 862   | 0.9 | 1.8 | 3.5  | 346 | O | Petrosel. <sup>v</sup> | FC:PI |
| 709  | <i>Rosa</i> × <i>hybrida</i> cv. 'Mountbatten'<br>(Floribunda class)                   | Yes | Rosaceae   | D | 28° | 4              | P | 1,127 | 1.2 | 2.3 | 4.6  | 346 | O | Petrosel. <sup>v</sup> | FC:PI |
| 710b | <i>Rosa acicularis</i> Lindl. var. <i>engelmannii</i>                                  | Yes | Rosaceae   | D | 42° | 6              | P | 1,470 | 1.5 | 3.0 | 6.1  | 346 | O | Petrosel. <sup>v</sup> | FC:PI |
| 711  | <i>Rosa arvensis</i> Huds.                                                             | Yes | Rosaceae   | D | 14° | 2              | P | 588   | 0.6 | 1.1 | 2.2  | 346 | O | Petrosel. <sup>v</sup> | FC:PI |
| 712  | <i>Rosa banksiae</i> Ait. var. <i>lutea</i>                                            | Yes | Rosaceae   | D | 14° | 2              | P | 490   | 0.5 | 1.0 | 2.1  | 346 | O | Petrosel. <sup>v</sup> | FC:PI |
| 713  | <i>Rosa bella</i> Rehd. & Wils.                                                        | Yes | Rosaceae   | D | 28° | 4              | P | 980   | 1.0 | 1.9 | 3.9  | 346 | O | Petrosel. <sup>v</sup> | FC:PI |
| 714  | <i>Rosa bracteata</i> Wendl.                                                           | Yes | Rosaceae   | D | 14° | 2              | P | 588   | 0.6 | 1.2 | 2.4  | 346 | O | Petrosel. <sup>v</sup> | FC:PI |
| 715b | <i>Rosa canina</i> L.                                                                  | Yes | Rosaceae   | D | 35° | 5              | P | 1,470 | 1.5 | 2.9 | 5.8  | 346 | O | Petrosel. <sup>v</sup> | FC:PI |
| 716  | <i>Rosa centifolia</i> L.                                                              | Yes | Rosaceae   | D | 28° | 4              | P | 1,078 | 1.1 | 2.2 | 4.5  | 346 | O | Petrosel. <sup>v</sup> | FC:PI |
| 717  | <i>Rosa chinensis</i> Jacq.                                                            | Yes | Rosaceae   | D | 14° | 2              | P | 588   | 0.6 | 1.2 | 2.3  | 346 | O | Petrosel. <sup>v</sup> | FC:PI |
| 718  | <i>Rosa damascena</i> Mill. var. <i>versicolor</i>                                     | Yes | Rosaceae   | D | 28° | 4              | P | 1,078 | 1.1 | 2.2 | 4.3  | 346 | O | Petrosel. <sup>v</sup> | FC:PI |
| 719  | <i>Rosa fedtschenkooana</i> Reg.                                                       | Yes | Rosaceae   | D | 28° | 4              | P | 980   | 1.0 | 1.9 | 3.9  | 346 | O | Petrosel. <sup>v</sup> | FC:PI |
| 720  | <i>Rosa foetida</i> Herrm.                                                             | Yes | Rosaceae   | D | 28° | 4              | P | 980   | 1.0 | 2.0 | 3.9  | 346 | O | Petrosel. <sup>v</sup> | FC:PI |
| 721  | <i>Rosa foliolosa</i> Nutt.                                                            | Yes | Rosaceae   | D | 14° | 2              | P | 490   | 0.5 | 0.9 | 1.9  | 346 | O | Petrosel. <sup>v</sup> | FC:PI |
| 722  | <i>Rosa gallica</i> L. var. <i>officinalis</i>                                         | Yes | Rosaceae   | D | 28° | 4              | P | 1,078 | 1.1 | 2.2 | 4.4  | 346 | O | Petrosel. <sup>v</sup> | FC:PI |
| 723  | <i>Rosa iliensis</i> Chrshan                                                           | Yes | Rosaceae   | D | 14° | 2              | P | 490   | 0.5 | 1.0 | 1.9  | 346 | O | Petrosel. <sup>v</sup> | FC:PI |
| 724  | <i>Rosa laevigata</i> Michx.                                                           | Yes | Rosaceae   | D | 14° | 2              | P | 588   | 0.6 | 1.1 | 2.3  | 346 | O | Petrosel. <sup>v</sup> | FC:PI |
| 725  | <i>Rosa latibracteata</i> Boulenger                                                    | Yes | Rosaceae   | D | 28° | 4              | P | 980   | 1.0 | 1.9 | 3.8  | 346 | O | Petrosel. <sup>v</sup> | FC:PI |
| 726  | <i>Rosa moyesii</i> Hemsl. & Wils.                                                     | Yes | Rosaceae   | D | 42° | 6              | P | 1,372 | 1.4 | 2.9 | 5.8  | 346 | O | Petrosel. <sup>v</sup> | FC:PI |
| 727  | <i>Rosa nitida</i> Willd.                                                              | Yes | Rosaceae   | D | 14° | 2              | P | 490   | 0.5 | 1.0 | 1.9  | 346 | O | Petrosel. <sup>v</sup> | FC:PI |
| 728  | <i>Rosa persica</i> Michx.                                                             | Yes | Rosaceae   | D | 14° | 2              | P | 392   | 0.4 | 0.8 | 1.7  | 346 | O | Petrosel. <sup>v</sup> | FC:PI |
| 729  | <i>Rosa roxburghii</i> Tratt. var. <i>hirtula</i>                                      | Yes | Rosaceae   | D | 14° | 2              | P | 490   | 0.5 | 1.0 | 1.9  | 346 | O | Petrosel. <sup>v</sup> | FC:PI |
| 730  | <i>Rosa rugosa</i> Thunb. var. <i>alba</i>                                             | Yes | Rosaceae   | D | 14° | 2              | P | 490   | 0.5 | 1.0 | 2.0  | 346 | O | Petrosel. <sup>v</sup> | FC:PI |
| 731  | <i>Rosa sempervirens</i> L.                                                            | Yes | Rosaceae   | D | 14° | 2              | P | 588   | 0.6 | 1.1 | 2.3  | 346 | O | Petrosel. <sup>v</sup> | FC:PI |
| 732  | <i>Rosa sericea</i> Lindl. f. <i>pteracantha</i>                                       | Yes | Rosaceae   | D | 14° | 2              | P | 392   | 0.4 | 0.8 | 1.6  | 346 | O | Petrosel. <sup>v</sup> | FC:PI |
| 733  | <i>Rosa spinosissima</i> L. var. <i>hispidata</i>                                      | Yes | Rosaceae   | D | 28° | 4              | P | 882   | 0.9 | 1.9 | 3.7  | 346 | O | Petrosel. <sup>v</sup> | FC:PI |
| 734  | <i>Rosa stellata</i> Woot. var. <i>mirifica</i>                                        | Yes | Rosaceae   | D | 14° | 2              | P | 392   | 0.4 | 0.9 | 1.7  | 346 | O | Petrosel. <sup>v</sup> | FC:PI |
| 735  | <i>Rosa virginiana</i> Mill.                                                           | Yes | Rosaceae   | D | 28° | 4              | P | 980   | 1.0 | 2.0 | 3.9  | 346 | O | Petrosel. <sup>v</sup> | FC:PI |
| 736a | <i>Rosa wichuraiana</i> Crep.                                                          | Yes | Rosaceae   | D | 14° | 2              | P | 588   | 0.6 | 1.1 | 2.3  | 346 | O | Petrosel. <sup>v</sup> | FC:PI |
| 737  | <i>Rosa willmottiae</i> Hemsl.                                                         | Yes | Rosaceae   | D | 14° | 2              | P | 490   | 0.5 | 0.9 | 1.8  | 346 | O | Petrosel. <sup>v</sup> | FC:PI |
| 738  | <i>Rosa xanthina</i> Lindl. cv. 'Canary Bird'                                          | Yes | Rosaceae   | D | 14° | 2              | P | 392   | 0.4 | 0.8 | 1.6  | 346 | O | Petrosel. <sup>v</sup> | FC:PI |

APPENDIX. (continued, the superscript letters refer to notes concerning this table)

| Entry number <sup>g</sup> | Species                                                              | Voucher        | Family                 | Monocot or dicot | Ploidy level (x) | Life cycle type <sup>h</sup> | DNA amount             |         |         |         | Original ref. <sup>a</sup> | Present amount <sup>†</sup> | Standard species <sup>†b1</sup> | Method <sup>†</sup> |
|---------------------------|----------------------------------------------------------------------|----------------|------------------------|------------------|------------------|------------------------------|------------------------|---------|---------|---------|----------------------------|-----------------------------|---------------------------------|---------------------|
|                           |                                                                      |                |                        |                  |                  |                              | IC (Mbp <sup>s</sup> ) | 1C (pg) | 2C (pg) | 4C (pg) |                            |                             |                                 |                     |
| 739                       | <i>Rosstoglossum williamsianum</i><br>(Rchb.f.) Garay & G.C. Kennedy | No             | Orchidaceae            | M                | — <sup>n</sup>   | P                            | 7,546                  | 7.7     | 15.4    | 30.8    | 377                        | O                           | F                               | Fe                  |
| 740b                      | <i>Ruta graveolens</i> L.                                            | — <sup>m</sup> | Rutaceae               | D                | 8                | P                            | 686                    | 0.7     | 1.4     | 2.8     | 313                        | O                           | C <sup>d</sup>                  | Fe                  |
| 741c                      | <i>Saccharum officinarum</i> L.                                      | No             | Gramineae              | M                | 80               | P                            | 3,724                  | 3.8     | 7.7     | 15.4    | 342                        | O                           | G <sup>c</sup>                  | FC:EB               |
| 742c                      | <i>Saccharum robustum</i> Brandes & Jesw. ex Grassl                  | No             | Gramineae              | M                | 60               | P                            | 3,234                  | 3.3     | 6.5     | 13.0    | 342                        | O                           | G <sup>c</sup>                  | FC:EB               |
| 743                       | <i>Saccharum spontaneum</i> L.                                       | No             | Gramineae              | M                | 64               | P                            | 3,136                  | 3.2     | 6.3     | 12.6    | 342                        | O                           | G <sup>c</sup>                  | FC:EB               |
| 744                       | <i>Salacca zaiacca</i> (Gaertn) Voss                                 | Yes            | Palmae                 | M                | — <sup>n</sup>   | P                            | 1,274                  | 1.3     | 2.6     | 5.2     | 377                        | O                           | B                               | Fe                  |
| 745                       | <i>Sarcandra glabra</i> <sup>1</sup>                                 | Yes            | Chloranthaceae         | D                | 30               | P                            | 4,214                  | 4.3     | 8.7     | 17.4    | 341                        | O                           | B <sup>c</sup>                  | Fe                  |
| 746                       | <i>Sasa veitchii</i> Rehder                                          | No             | Gramineae              | M                | c.50             | P                            | 3,528                  | 3.6     | 7.1     | 14.3    | 377                        | O                           | F                               | Fe                  |
| 747                       | <i>Satureja montana</i> L.                                           | — <sup>m</sup> | Labiatae <sup>1</sup>  | D                | 30 <sup>o</sup>  | P                            | 2,744                  | 2.8     | 5.5     | 11.1    | 313                        | O                           | C <sup>d</sup>                  | Fe                  |
| 748                       | <i>Schomburgkia lyonsii</i> Lindl.                                   | No             | Orchidaceae            | M                | — <sup>n</sup>   | P                            | 1,906 <sup>t</sup>     | 2.0     | 3.9     | 7.8     | 307                        | O                           | <i>Gallus</i> <sup>f</sup>      | FC:PI               |
| 749                       | <i>Semiarundinaria tranquillans</i> Koidz                            | No             | Gramineae              | M                | c.50             | P                            | 3,136                  | 3.2     | 6.3     | 12.7    | 377                        | O                           | F                               | Fe                  |
| 750                       | <i>Sesleria albicans</i> Kit. ex Schult <sup>h</sup> & au            | Yes            | Gramineae <sup>1</sup> | M                | 28               | P                            | 4,508 <sup>t</sup>     | 4.6     | 9.3     | 18.5    | 370                        | O                           | H <sup>c</sup>                  | FC:PI               |
| 751                       | <i>Sesleria caerulea</i> (L.) Ard.                                   | Yes            | Gramineae <sup>1</sup> | M                | 28               | P                            | 4,508 <sup>t</sup>     | 4.6     | 9.1     | 18.2    | 370                        | O                           | H <sup>c</sup>                  | FC:PI               |
| 752                       | <i>Sesleria heuffleriana</i> Schur                                   | Yes            | Gramineae <sup>1</sup> | M                | 28               | P                            | 4,704 <sup>t</sup>     | 4.8     | 9.6     | 19.2    | 370                        | O                           | H <sup>c</sup>                  | FC:PI               |
| 753                       | <i>Sesleria heuffleriana</i> Schur                                   | Yes            | Gramineae <sup>1</sup> | M                | 56               | P                            | 9,310 <sup>t</sup>     | 9.5     | 19.0    | 37.9    | 370                        | O                           | H <sup>c</sup> -752             | FC:PI               |
| 754a                      | <i>Sesleria sadleriana</i> Janka                                     | Yes            | Gramineae <sup>1</sup> | M                | 56               | P                            | 8,722 <sup>t</sup>     | 8.9     | 17.7    | 35.5    | 370                        | O                           | H <sup>c</sup> -752             | FC:PI               |
| 754b                      | <i>Sesleria sadleriana</i> Janka                                     | Yes            | Gramineae <sup>1</sup> | M                | 56               | P                            | 8,918 <sup>t</sup>     | 9.1     | 18.3    | 36.6    | 370                        | O                           | H <sup>c</sup> -752             | FC:PI               |
| 755                       | <i>Sesleria tatrae</i> (Degen) Deyl                                  | Yes            | Gramineae <sup>1</sup> | M                | 56               | P                            | 8,918 <sup>t</sup>     | 9.1     | 18.3    | 36.6    | 370                        | O                           | H <sup>c</sup> -752             | FC:PI               |
| 756                       | <i>Setaria chevalieri</i> Stapf                                      | Yes            | Gramineae              | M                | 36               | P                            | 2,156                  | 2.2     | 4.5     | 8.9     | 330                        | O                           | <i>Petunia</i> <sup>f</sup>     | FC:EB               |
| 757                       | <i>Setaria faberi</i> Herrm.                                         | Yes            | Gramineae              | M                | 36               | A                            | 1,568                  | 1.6     | 3.3     | 6.5     | 375                        | O                           | F                               | Fe                  |
| 758                       | <i>Setaria glauca</i> <sup>1</sup>                                   | Yes            | Gramineae              | M                | — <sup>n</sup>   | A                            | 1,176                  | 1.2     | 2.5     | 4.9     | 375                        | O                           | F                               | Fe                  |
| 759                       | <i>Setaria holstii</i> Herrm.                                        | Yes            | Gramineae              | M                | 18               | P                            | 882                    | 0.9     | 1.7     | 3.4     | 330                        | O                           | <i>Petunia</i> <sup>f</sup>     | FC:EB               |
| 760                       | <i>Setaria incrassata</i> Hack.                                      | Yes            | Gramineae              | M                | 36               | A                            | 2,058                  | 2.1     | 4.2     | 8.5     | 330                        | O                           | <i>Petunia</i> <sup>f</sup>     | FC:EB               |
| 761a                      | <i>Setaria italica</i> (L.) Beauv. cv. Little red                    | No             | Gramineae              | M                | 18 <sup>o</sup>  | A                            | 490                    | 0.5     | 1.1     | 2.1     | 372                        | O                           | K                               | Fe                  |
| 761b                      | <i>Setaria italica</i> (L.) Beauv. <sup>i</sup>                      | Yes            | Gramineae              | M                | 18               | A                            | 490                    | 0.5     | 1.0     | 2.1     | 330                        | O                           | <i>Petunia</i> <sup>f</sup>     | FC:EB               |
| 762                       | <i>Setaria leiantha</i> Hack. ex Stuck.                              | Yes            | Gramineae              | M                | 36               | A                            | 1,176                  | 1.2     | 2.4     | 4.8     | 330                        | O                           | <i>Petunia</i> <sup>f</sup>     | FC:EB               |
| 763                       | <i>Setaria macrostachya</i> <sup>1</sup>                             | Yes            | Gramineae              | M                | 54               | P                            | 1,764                  | 1.8     | 3.6     | 7.2     | 330                        | O                           | <i>Petunia</i> <sup>f</sup>     | FC:EB               |
| 764                       | <i>Setaria neglecta</i> <sup>1</sup>                                 | Yes            | Gramineae              | M                | 36               | A                            | 1,764                  | 1.8     | 3.5     | 7.0     | 330                        | O                           | <i>Petunia</i> <sup>f</sup>     | FC:EB               |
| 765                       | <i>Setaria palmifolia</i> (Koenig) Stapf                             | Yes            | Gramineae              | M                | 36               | P                            | 1,862                  | 1.9     | 3.9     | 7.8     | 330                        | O                           | <i>Lycopers</i> <sup>e</sup>    | FC:EB               |
| 766                       | <i>Setaria parviflora</i> (Poiret) M.Kerguelen                       | Yes            | Gramineae              | M                | 36               | P                            | 2,352                  | 2.4     | 4.8     | 9.6     | 330                        | O                           | <i>Petunia</i> <sup>f</sup>     | FC:EB               |
| 767                       | <i>Setaria pumila</i> Nob. <sup>i</sup>                              | Yes            | Gramineae              | M                | 54               | A                            | 2,548                  | 2.6     | 5.3     | 10.5    | 330                        | O                           | <i>Petunia</i> <sup>f</sup>     | FC:EB               |
| 768                       | <i>Setaria queenstandica</i> Domin.                                  | Yes            | Gramineae              | M                | 36               | A                            | 1,372                  | 1.4     | 2.8     | 5.5     | 330                        | O                           | <i>Lycopers</i> <sup>e</sup>    | FC:EB               |

|      |                                                                                                                           |                         |   |                 |    |     |                    |      |      |      |                   |   |                                 |       |
|------|---------------------------------------------------------------------------------------------------------------------------|-------------------------|---|-----------------|----|-----|--------------------|------|------|------|-------------------|---|---------------------------------|-------|
| 769a | <i>Setaria sphaacelata</i> (Schum.) Stapf & Hubb. <sup>1</sup>                                                            | Gramineae               | M | 36              | 4  | P   | 980                | 1.0  | 2.1  | 4.1  | 330               | O | <i>Lycopers.</i> <sup>c</sup>   | FC:EB |
| 769b | <i>Setaria sphaacelata</i> (Schum.) Stapf & Hubb. <sup>1</sup>                                                            | Gramineae               | M | 36              | 4  | P   | 1,666              | 1.7  | 3.3  | 6.6  | 330               | O | <i>Lycopers.</i> <sup>c</sup>   | FC:EB |
| 770a | <i>Setaria viridis</i> (L.) Beauv.                                                                                        | Gramineae               | M | 18              | 2  | E-A | 784                | 0.8  | 1.6  | 3.2  | 375               | O | F                               | Fe    |
| 770b | <i>Setaria viridis</i> (L.) Beauv. <sup>1</sup>                                                                           | Gramineae               | M | 18              | 2  | E-A | 490                | 0.5  | 1.0  | 2.1  | 330               | O | <i>Petunia</i> <sup>f</sup>     | FC:EB |
| 771  | <i>Setaria woodii</i> Hack.                                                                                               | Gramineae               | M | 18              | 2  | -g  | 784                | 0.8  | 1.7  | 3.3  | 330               | O | <i>Petunia</i> <sup>f</sup>     | FC:EB |
| 772  | <i>Sida spinosa</i> <sup>d</sup>                                                                                          | Malvaceae               | D | -n              | -p | A   | 980                | 1.0  | 2.0  | 3.9  | 375               | O | F                               | Fe    |
| 773  | <i>Smitinandia micrantha</i> (Lindl.) Holtt.                                                                              | Orchidaceae             | M | 38 <sup>o</sup> | -p | P   | 2,055 <sup>t</sup> | 2.1  | 4.2  | 8.4  | 307               | O | <i>Gallus</i> <sup>f</sup>      | FC:PI |
| 774b | <i>Solanum berthaultii</i> Hawkes                                                                                         | Solanaceae              | D | 24              | 2  | P   | 784                | 0.8  | 1.6  | 3.2  | 337               | O | <i>Gallus</i> <sup>f</sup>      | FC:PI |
| 775  | <i>Solanum brevidens</i> Phil. <sup>h &amp; ak</sup>                                                                      | Solanaceae              | D | 24              | 2  | P   | 740                | 0.1  | 1.5  | 3.0  | 337               | O | <i>Gallus</i> <sup>f</sup>      | FC:PI |
| 776b | <i>Solanum demissum</i> Lindl.                                                                                            | Solanaceae              | D | 72              | 6  | P   | 2,352              | 2.4  | 4.9  | 9.8  | 337               | O | <i>Gallus</i> <sup>f</sup>      | FC:PI |
| 777  | <i>Solanum etuberosum</i> Lindl. <sup>h &amp; ak</sup>                                                                    | Solanaceae              | D | 24              | 2  | P   | 755                | 0.8  | 1.5  | 3.1  | 337               | O | <i>Gallus</i> <sup>f</sup>      | FC:PI |
| 778  | <i>Solanum fernandezianum</i> Phil. <sup>h &amp; ak</sup>                                                                 | Solanaceae              | D | 24              | 2  | P   | 799                | 0.8  | 1.6  | 3.3  | 337               | O | <i>Gallus</i> <sup>f</sup>      | FC:PI |
| 779g | <i>Solanum tuberosum</i> L. cv. Pito                                                                                      | Solanaceae              | D | 48              | 4  | P   | 1,715              | 1.8  | 3.5  | 7.0  | 337               | O | <i>Gallus</i> <sup>f</sup>      | FC:PI |
| 779h | <i>Solanum tuberosum</i> L. cv. Van Gogh                                                                                  | Solanaceae              | D | 48              | 4  | P   | 1,715              | 1.8  | 3.5  | 7.0  | 337               | O | <i>Gallus</i> <sup>f</sup>      | FC:PI |
| 779i | <i>Solanum tuberosum</i> L. cv. Pentland Crown                                                                            | Solanaceae              | D | 48              | 4  | P   | 1,774              | 1.8  | 3.6  | 7.2  | 337               | O | <i>Gallus</i> <sup>f</sup>      | FC:PI |
| 780  | <i>Spergula arvensis</i> L.                                                                                               | Caryophyllaceae         | D | 18              | -p | A   | 1,078              | 1.1  | 2.1  | 4.2  | 375               | O | F                               | Fe    |
| 781  | <i>Stromanthe sanguinea</i> Sond.                                                                                         | Marantaceae             | M | 44 <sup>o</sup> | 4  | P   | 686                | 0.7  | 1.3  | 2.7  | 377               | O | J                               | Fe    |
| 782  | <i>Tagetes patula</i> L.                                                                                                  | Compositae              | D | 48 <sup>o</sup> | 4  | A   | 1,176              | 1.2  | 2.4  | 4.7  | 373               | O | G <sup>b2</sup>                 | FC:PI |
| 783a | <i>Tanacetum vulgare</i> L. <sup>h</sup>                                                                                  | Compositae <sup>d</sup> | D | 18              | 2  | P   | 3,822              | 3.9  | 7.8  | 15.7 | 338               | O | F <sup>b2</sup>                 | FC:PI |
| 783b | <i>Tanacetum vulgare</i> L. <sup>h</sup>                                                                                  | Compositae <sup>d</sup> | D | 18              | 2  | P   | 4,900              | 5.0  | 10.0 | 19.9 | 338               | O | F <sup>b2</sup>                 | FC:PI |
| 784  | <i>Thinopyrum bessarabicum</i> (Savul & Rayass) A.Löve <sup>1</sup>                                                       | Gramineae <sup>d</sup>  | M | 14              | 2  | P   | 7,350              | 7.5  | 15.0 | 29.9 | 343 <sup>al</sup> | O | A <sup>c</sup> & F <sup>c</sup> | FC:PI |
| 785  | <i>Thinopyrum caespitosum</i> Liu & Wang                                                                                  | Gramineae <sup>d</sup>  | M | 28              | 4  | P   | 9,702              | 9.9  | 19.9 | 39.8 | 343 <sup>al</sup> | O | A <sup>c</sup> & F <sup>c</sup> | FC:PI |
| 786b | <i>Thinopyrum elongatum</i> (Host) D.R.Dewey (= <i>Agropyron elongatum</i> ) <sup>1</sup>                                 | Gramineae <sup>d</sup>  | M | 14              | 2  | P   | 5,978              | 6.1  | 12.2 | 24.4 | 343 <sup>al</sup> | O | A <sup>c</sup> & F <sup>c</sup> | FC:PI |
| 787a | <i>Thinopyrum intermedium</i> ssp. <i>barbulatum</i> (Schur) Barkw. & D.R.Dewey cv. Manska                                | Gramineae <sup>d</sup>  | M | 42              | 6  | P   | 12,740             | 13.0 | 25.9 | 51.8 | 343 <sup>al</sup> | O | A <sup>c</sup> & F <sup>c</sup> | FC:PI |
| 787b | <i>Thinopyrum intermedium</i> ssp. <i>intermedium</i> (Host) Barkw. & D.R.Dewey cv. Slate                                 | Gramineae <sup>d</sup>  | M | 42              | 6  | P   | 12,838             | 13.1 | 26.3 | 52.5 | 343 <sup>al</sup> | O | A <sup>c</sup> & F <sup>c</sup> | FC:PI |
| 788a | <i>Thinopyrum junceiforme</i> (Löve & Löve) A.Löve (= <i>Agropyron junceum</i> ssp. <i>boreoatlanticum</i> ) <sup>h</sup> | Gramineae <sup>d</sup>  | M | 28              | 4  | P   | 11,564             | 11.8 | 23.6 | 47.2 | 343 <sup>al</sup> | O | A <sup>c</sup> & F <sup>c</sup> | FC:PI |
| 788b | <i>Thinopyrum junceiforme</i> (Löve & Löve) A.Löve (= <i>Agropyron junceum</i> ssp. <i>boreoatlanticum</i> ) <sup>h</sup> | Gramineae <sup>d</sup>  | M | 28              | 4  | P   | 12,740             | 13.0 | 26.0 | 51.9 | 343 <sup>al</sup> | O | A <sup>c</sup> & F <sup>c</sup> | FC:PI |

APPENDIX. (continued, the superscript letters refer to notes concerning this table)

| Entry number <sup>e</sup> | Species                                                                                                                | Voucher        | Family                 | Monocot or dicot | 2n <sup>†</sup> | Ploidy level (x) | Life cycle type <sup>§</sup> | DNA amount             |         |         |         | Original ref. <sup>a</sup> | Present amount <sup>†</sup> | Standard species <sup>b,1</sup> | Method <sup>††</sup> |
|---------------------------|------------------------------------------------------------------------------------------------------------------------|----------------|------------------------|------------------|-----------------|------------------|------------------------------|------------------------|---------|---------|---------|----------------------------|-----------------------------|---------------------------------|----------------------|
|                           |                                                                                                                        |                |                        |                  |                 |                  |                              | IC (Mbp <sup>5</sup> ) | 1C (pg) | 2C (pg) | 4C (pg) |                            |                             |                                 |                      |
| 789                       | <i>Thinopyrum ponticum</i> (Podp.) Barkw. & D.R.Dewey cv. Platte (= <i>Agropyron elongatum</i> ssp. <i>ruthenium</i> ) | No             | Gramineae <sup>d</sup> | M                | 70              | 10               | P                            | 22,148                 | 22.6    | 45.3    | 90.5    | 343 <sup>al</sup>          | O                           | A <sup>c</sup> & F <sup>c</sup> | FC:PI                |
| 790b                      | <i>Thymus vulgaris</i> L.                                                                                              | — <sup>m</sup> | Labiatae <sup>d</sup>  | D                | 30 <sup>o</sup> | 6                | P                            | 2,058                  | 2.1     | 4.2     | 8.3     | 313                        | O                           | C <sup>d</sup>                  | Fe                   |
| 791                       | <i>Trichoceros antennifera</i> H.B. & K.                                                                               | No             | Orchidaceae            | M                | — <sup>n</sup>  | — <sup>p</sup>   | P                            | 4,312                  | 4.4     | 8.7     | 17.5    | 377                        | O                           | F                               | Fe                   |
| 792                       | <i>Trichopilia maculata</i> Robb.f.                                                                                    | No             | Orchidaceae            | M                | — <sup>n</sup>  | — <sup>p</sup>   | P                            | 2,288 <sup>t</sup>     | 2.4     | 4.7     | 9.4     | 307                        | O                           | <i>Gallus</i> <sup>f</sup>      | FC:PI                |
| 793e                      | <i>Trifolium repens</i> L. Daeno population <sup>n</sup>                                                               | No             | Leguminosae            | D                | 32 <sup>o</sup> | 4                | P                            | 1,274                  | 1.3     | 2.7     | 5.3     | 329                        | O                           | B & I <sup>c</sup>              | Fe                   |
| 793f                      | <i>Trifolium repens</i> L. Grasslands Kopu population <sup>n</sup>                                                     | No             | Leguminosae            | D                | 32 <sup>o</sup> | 4                | P                            | 1,078                  | 1.1     | 2.2     | 4.4     | 329                        | O                           | B & I <sup>c</sup>              | Fe                   |
| 794                       | <i>Vanda lamellata</i> Lindl.                                                                                          | No             | Orchidaceae            | M                | 38 <sup>o</sup> | — <sup>p</sup>   | P                            | 2,009 <sup>t</sup>     | 2.1     | 4.1     | 8.2     | 307                        | O                           | <i>Gallus</i> <sup>f</sup>      | FC:PI                |
| 795                       | <i>Vanilla phaeantha</i> Rchb.f.                                                                                       | No             | Orchidaceae            | M                | 32 <sup>o</sup> | — <sup>p</sup>   | P                            | 7,443 <sup>t</sup>     | 7.6     | 15.2    | 30.4    | 307                        | O                           | <i>Gallus</i> <sup>f</sup>      | FC:PI                |
| 796                       | <i>Vanilla pompona</i> Schiede                                                                                         | No             | Orchidaceae            | M                | 32 <sup>o</sup> | — <sup>p</sup>   | P                            | 7,080 <sup>t</sup>     | 7.3     | 14.5    | 29.0    | 307                        | O                           | <i>Gallus</i> <sup>f</sup>      | FC:PI                |
| 797                       | <i>Vicia amoena</i> Fisch. ex Ser. var. <i>sericea</i>                                                                 | Yes            | Leguminosae            | D                | 12              | 2                | P                            | 6,272                  | 6.4     | 12.8    | 25.5    | 312                        | O                           | B                               | Fe                   |
| 798a                      | <i>Vicia amoena</i> Fisch. ex Ser. <sup>h</sup>                                                                        | Yes            | Leguminosae            | D                | 24              | 4                | P                            | 8,428                  | 8.6     | 17.2    | 34.4    | 312                        | O                           | B                               | Fe                   |
| 798b                      | <i>Vicia amoena</i> Fisch. ex Ser. <sup>h</sup>                                                                        | Yes            | Leguminosae            | D                | 24              | 4                | P                            | 9,114                  | 9.3     | 18.6    | 37.2    | 312                        | O                           | B                               | Fe                   |
| 799b                      | <i>Vicia amurensis</i> Oett.                                                                                           | Yes            | Leguminosae            | D                | 12              | 2                | P                            | 6,370                  | 6.5     | 12.9    | 25.8    | 312                        | O                           | B                               | Fe                   |
| 800c                      | <i>Vicia pseudorobus</i> Fisch & Mey.                                                                                  | Yes            | Leguminosae            | D                | 12              | 2                | P                            | 6,958                  | 7.1     | 14.1    | 28.2    | 312                        | O                           | B                               | Fe                   |
| 801b                      | <i>Vicia ramuliflora</i> (Maxim) Ohwi                                                                                  | Yes            | Leguminosae            | D                | 12              | 2                | P                            | 6,958                  | 7.1     | 14.3    | 28.5    | 312                        | O                           | B                               | Fe                   |
| 802                       | <i>Vicia ramuliflora</i> (Maxim) Ohwi                                                                                  | Yes            | Leguminosae            | D                | 24              | 4                | P                            | 12,544                 | 12.8    | 25.5    | 51.0    | 312                        | O                           | B                               | Fe                   |
| 803b                      | <i>Vicia unijuga</i> A.Br.                                                                                             | Yes            | Leguminosae            | D                | 12              | 2                | P                            | 8,428                  | 8.6     | 17.2    | 34.4    | 312                        | O                           | B                               | Fe                   |
| 804                       | <i>Vicia unijuga</i> A.Br.                                                                                             | Yes            | Leguminosae            | D                | 24              | 4                | P                            | 15,876                 | 16.2    | 32.5    | 64.9    | 312                        | O                           | B                               | Fe                   |
| 805                       | <i>Xanthium strumarium</i> <sup>l</sup>                                                                                | Yes            | Compositae             | D                | 36              | — <sup>p</sup>   | A                            | 3,136                  | 3.2     | 6.3     | 12.6    | 375                        | O                           | F                               | Fe                   |
| 806                       | <i>Xylopiya</i> sp. <sup>y</sup>                                                                                       | Yes            | Annonaceae             | D                | 16              | — <sup>p</sup>   | P                            | 980                    | 1.0     | 2.0     | 4.0     | 341                        | O                           | B <sup>c</sup>                  | Fe                   |
| 807a                      | <i>Zingiber officinale</i> Rosc. cv. S-541 <sup>h</sup>                                                                | Yes            | Zingiberaceae          | M                | 22              | 2                | P                            | 5,880                  | 6.0     | 12.1    | 24.1    | 324                        | O                           | B <sup>c</sup>                  | Fe                   |
| 807b                      | <i>Zingiber officinale</i> Rosc. cv. Z-17 <sup>h</sup>                                                                 | Yes            | Zingiberaceae          | M                | 22              | 2                | P                            | 4,802                  | 4.9     | 9.8     | 19.7    | 324                        | O                           | B <sup>c</sup>                  | Fe                   |

† Chromosome number.

§ E, ephemeral; A, annual; B, biennial; P, perennial.

† O, original value; C, calibrated value

\* The standard species used to calibrate the present amount.

†† Fe, Feulgen microdensitometry; FC, flow cytometry using one of the following fluorochromes: PI, propidium iodide; DAPI, 4', 6-diamidino-2-phenylindole; EB, ethidium bromide; MI, mithramycin.



standard. As the ratios for *Maranta bicolor* (2.09/0.1734 = 12.053) and *Stromanthe sanguinea* (2.68/0.2254 = 11.889) were both so similar, it is reasonable to assume that plants growing at RBG Kew had the same ploidy levels as those used by Sharma and Mukhopadhyay (loc. cit.).

(ap) 4C DNA amounts for 26 *Carex* species given in Table 1 of Nishikawa *et al.* (1984, Ref. 357) in arbitrary units (a.u.) were converted to absolute units using the conversion factor 1 pg = 98.25 a.u. This factor was obtained as the ratio of the estimates for *Carex ciliatmarginata* (225 a.u.) obtained by Nishikawa *et al.* (loc. cit.) and L. Hanson at RBG, Kew (4C = 2.29 pg). Fixed root-tips of the original material used by Nishikawa *et al.* (1984) were kindly provided by Prof. T. Hoshino (Okayama University of Science, Japan) in 1999, and its 4C DNA amount was estimated as 2.29 pg by Feulgen microdensitometry using *Vigna radiata* 'Berken' (4C = 2.12 pg) as a calibration standard.

Two species listed by Nishikawa *et al.* (loc. cit.) were reported to display aneuploidy (*C. oxyandra*, 2n = 18, 20, 24, 26; and *C. conica*, 2n = 32, 36, 38) but no significant differences in DNA amount were found. Consequently, only the highest DNA amount for each species is given in the Appendix. Nishikawa *et al.* noted 'it seems that these intraspecific aneuploids resulted from simple change of chromosome number caused by fragmentation or fusion, but without deficiency and/or duplication of chromosome segment'. Nishikawa *et al.* (loc. cit.) also reported large intraspecific variation in DNA content in six species: *C. tristachya* (18%), *C. capillacea* (13%), *C. brownii* (15%), *C. thunbergii* (14%), *C. paxii* (17%) and *C. nubigera* (14%), however, only one DNA value was listed for each of these species in Table 1 of their paper and these are listed in the Appendix.

(aq) Six of the eight species of *Citrus* examined by Ollitrault *et al.* (1994, Ref. 358) showed significant variation in DNA amounts between four or five cultivars of the same species (although this was not greater than 3%). Table 1 in Ref. 358 gave the mean value for each species, and it is this value that is listed in the Appendix.

(ar) Greilhuber and Obermayer (1998, Ref. 360) investigated genome size variation in eight accessions of *Cajanus cajan* using both flow cytometry and Feulgen microdensitometry. They were however, unable to confirm the 1.29-fold variation in genome size reported for this species by Ohri *et al.* (1994). Only flow cytometry was able to detect statistically significant but minor differences in genome size between different accessions, Feulgen microdensitometry was apparently not sensitive enough. However, the authors noted that '... in flow cytometry the preparation and constitution of the material can result in minor systematic deviations from the true value'. Thus the significance of the marginal differences in genome size detected by flow cytometry remains to be determined.

(as) In Ref. 361, Dimitrova *et al.* (1999) estimated the genome sizes of three subspecies of *Crepis foetida* (ssp. *foetida*, ssp. *rhoeadifolia* and ssp. *commutata*) using three techniques: Feulgen microdensitometry, flow cytometry and image analysis. The mean DNA C-values obtained

for each subspecies estimated by the first two methods are given in the Appendix. The values for image analysis were found to be somewhat lower. Dimitrova *et al.* (loc. cit.) felt that this bias needed further investigation and so these results have been excluded from the Appendix.

(at) In Ref. 368 (Hultquist *et al.*, 1997), the DNA C-values for 30 germplasm accessions of the switchgrass *Panicum virgatum* from midwestern U.S. prairies were estimated. However, only the highest and lowest DNA amounts for the tetraploid and octoploid populations are listed in the Appendix.

(au) In Ref. 370, Lysák and Doležel (1998) listed DNA amounts for five central European *Sesleria* species. While the mean DNA content of each species given in Table 2 of their paper is listed in the Appendix, the authors noted that intraspecific variation in DNA content for *S. albicans* of 1.84% was statistically significant. Thus the DNA amount of *S. albicans* given in the Appendix may not be representative of all populations of this species. The cause of the variation was not determined.

Lysák and Doležel (loc. cit.) also reported a statistically significant difference (3.02%) in DNA amount for two populations of the octoploid *S. sadleriana* ('Vršatec' and 'Hainburg'). Both values were listed in Ref. 370 and are given in the Appendix. The possibility of two distinct origins of the polyploid followed by separate evolution of the populations was suggested to account for these intraspecific differences. Multiple origins of polyploids have been documented in numerous taxa and are not now considered to be rare events (Soltis and Soltis, 1999).

#### Original references for DNA values

Named references in the above notes are given in 'Literature cited'. Only numbered references of original sources of species DNA values in the Appendix (column 13) are given in Key below.

307. Jones WE, Kuehnle AR, Arumuganathan K. 1998. Nuclear DNA content of 26 Orchid (Orchidaceae) genera with emphasis on *Dendrobium*. *Annals of Botany* 82: 189–194.
308. Martel E, de Nay D, Šiljak-Yakovlev S, Brown S, Sarr A. 1997. Genome size variation and basic chromosome number in pearl millet and fourteen related *Pennisetum* species. *Journal of Heredity* 88: 139–143.
309. Cros J, Gavalda MC, Chabrillange N, Récallt C, Duperray C, Hamon S. 1994. Variations in the total nuclear DNA content in African *Coffea* species (Rubiaceae). *Café Cacao* 38: 3–10.
310. Cremonini R, Colonna N, Stefani A, Galasso I, Pignone D. 1994. Nuclear DNA content, chromatin organization and chromosome banding in brown and yellow seeds of *Dasypyrum villosum* (L.) P. Candargy. *Heredity* 72: 365–373.
311. Lindsay GC, Hopping ME, O'Brien IEW. 1994. Detection of protoplast-derived DNA tetraploid *Lisianthus* (*Eustoma grandiflorum*) plants by leaf and flower characteristics and by flow cytometry. *Plant Cell, Tissue and Organ Culture* 38: 53–55.
312. Li R, Liu C. 1996. DNA content of some taxa of *Vicia* sect. *Vicilla* in Northeast China. *Cytologia* 61: 225–228.
313. Ceccarelli M, Morosi L, Cionini PG. 1998. Chromocenter association in plant cell nuclei: determinants, functional significance, and evolutionary implications. *Genome* 41: 96–103.
314. Horjales M, Redondo N, Pérez B, Brown S. 1995. Presencia en Galicia de *Dactylis glomerata* L. Hexaploide. *Boletim da Sociedade Broteriana (Ser. 2)* 67: 223–230.

315. Morgan ER, Burge GK, Seelye JF, Grant JE, Hopping ME. 1995. Interspecific hybridisation between *Limonium perigrinum* Bergius and *Limonium purpuratum* L. *Euphytica* **83**: 215–224.
316. Morgan ER, Burge GK, Seelye JF, Hopping ME, Grant JE. 1998. Production of inter-specific hybrids between *Limonium perezii* (Stapf) Hubb. and *Limonium sinuatum* (L.) Mill. *Euphytica* **102**: 109–115.
317. Rudall PJ, Engleman EM, Hanson L, Chase MW. 1998. Embryology, cytology and systematics of *Hemiphylacus*, *Asparagus* and *Anemarrhena* (Asparagales). *Plant Systematics and Evolution* **211**: 181–199.
318. Vekemans X, Lefèbvre C, Coulaud J, Blaise S, Gruber W, Šiljak-Yakovlev S, Brown SC. 1996. Variation in nuclear DNA content at the species level in *Armeria maritima*. *Hereditas* **124**: 237–242.
319. Nandini AV, Murray BG, O'Brien IEW, Hammett KRW. 1997. Intra- and interspecific variation in genome size in *Lathyrus* (Leguminosae). *Botanical Journal of the Linnean Society* **125**: 359–366.
320. Bukhari YM. 1997. Nuclear DNA amounts in *Acacia* and *Prosopis* (Mimosaceae) and their evolutionary implications. *Hereditas* **126**: 45–51.
321. Ebert I, Greilhuber J, Speta F. 1996. Chromosome banding and genome size differentiation in *Prospero* (Hyacinthaceae): diploids. *Plant Systematics and Evolution* **203**: 143–177.
322. Barral G, Poggio L, Giberti GC. 1995. Chromosome numbers and DNA content from *Ilex argentina* (Aquifoliaceae). *Boletín de la Sociedad Argentina de Botanica* **30**: 243–248.
323. Zoldoš V, Papeš D, Brown SC, Panaud O, Šiljak-Yakovlev S. 1998. Genome size and base composition of seven *Quercus* species: inter- and intra-population variation. *Genome* **41**: 162–168.
324. Rai S, Das AB, Das P. 1997. Estimation of 4C DNA and karyotype analysis in Ginger (*Zingiber officinale* Rosc.). *Cytologia* **62**: 133–141.
325. Barre P, Noirot M, Louarn J, Duperray C, Hamon S. 1996. Reliable flow cytometric estimation of nuclear DNA content in coffee trees. *Cytometry* **24**: 32–38.
326. Dabrowska J. 1992. Chromosome number and DNA content in taxa of *Achillea* L. in relation to the distribution of the genus. *Prace Botaniczne* **49**: 1–84.
327. Palomino G, Sousa SM. 2000. Variation of nuclear DNA content in the biflorous species of *Lonchocarpus* (Leguminosae). *Annals of Botany* **85**: 69–76.
328. Palomino G, Doležel J, Cid R, Brunner I, Méndez I, Rubluc A. 1999. Nuclear genome stability of *Mammillaria san-angelensis* (Cactaceae) regenerants induced by auxins in long-term in vitro culture. *Plant Science* **141**: 191–200.
329. Campbell BD, Caradus JR, Hunt CI. 1999. Temperature responses and nuclear DNA amounts of seven white clover populations which differ in early spring growth rates. *New Zealand Journal of Agricultural Research* **42**: 9–17.
330. Le Thierry d'Ennequin M, Panaud O, Brown S, Šiljak-Yakovlev S, Sarr A. 1998. First evaluation of nuclear DNA content in *Setaria* genus by flow cytometry. *Journal of Heredity* **89**: 556–559.
331. Hopkins AA, Taliaferro CM, Murphy CD, Christian D. 1996. Chromosome number and nuclear DNA content of several switchgrass populations. *Crop Science* **36**: 1192–1195.
332. Ayele M, Doležel J, van Duren M, Brunner H, Zapata-Arias FJ. 1996. Flow cytometric analysis of nuclear genome of the Ethiopian cereal Tef [*Eragrostis tef* (Zucc.) Trotter]. *Genetica* **98**: 211–215.
333. Vosa CG, Bassi P. 1991. Chromosome [sic.] studies in the Southern African flora. The basic karyotype of eight species of succulent *Euphorbia* L. *Caryologia* **44**: 27–33.
334. Das AB, Mohanty S, Das P. 1997. Meiotic behaviour and nuclear DNA variation in some species of *Mammillaria* (Cactaceae). *Cytologia* **62**: 253–257.
335. D'Hont A, Paget-Goy A, Jenny C, Noyer JL, Baurens FC, Lagoda PJJ, Carreel F. 1999. Investigation of the complex genome structure of cultivated banana (*Musa* spp.) by flow cytometry, genomic DNA *in situ* hybridisation and repeated sequence analysis. In: May GD, ed. *The International Symposium on the Molecular and Cellular Biology of Banana*. BTI Cornell University, Ithaca, New York, March 22–25 1999. p. 9.
336. Baranyi M, Greilhuber J. 1999. Genome size in *Allium*: in quest of reproducible data. *Annals of Botany* **83**: 687–695.
337. Valkonen JPT. 1994. Nuclear DNA content of the *Solanum* spp. in the series *Etuberosa* as determined by laser flow cytometry. *Annals of Applied Biology* **125**: 589–600.
338. Keskitalo M, Lindén A, Valkonen JPT. 1998. Genetic and morphological diversity of Finnish tansy (*Tanacetum vulgare* L., Asteraceae). *Theoretical and Applied Genetics* **96**: 1141–1150.
339. Antonius K, Ahokas H. 1996. Flow cytometric determination of polyploidy level in spontaneous clones of strawberries. *Hereditas* **124**: 285.
340. Barakat A, Han DT, Benslimane A-A, Rode A, Bernardi G. 1999. The gene distribution in the genomes of pea, tomato and date palm. *FEBS Letters* **463**: 139–142.
341. Morawetz W, Samuel R. (pers. comm. 1998).
342. D'Hont A. (pers. comm. 1999).
343. Vogel KP, Arumuganathan K, Jensen KB. 1999. Nuclear DNA content of perennial grasses of the Triticeae. *Crop Science* **39**: 661–667.
344. Hopping ME. 1994. Flow cytometric analysis of *Actinidia* species. *New Zealand Journal of Botany* **32**: 85–93.
345. Lu K, Kaeppler SM, Vogel KP, Arumuganathan K, Lee DJ. 1998. Nuclear DNA content and chromosome numbers in switchgrass. *Great Plains Research* **8**: 269–280.
346. Yokoya K, Roberts AV, Mottley J, Lewis R, Brandham PE. 2000. Nuclear DNA amounts in roses. *Annals of Botany* **85**: 557–562.
347. Price HJ. (pers. comm. 1999).
348. Grauke LC, Johnston S, Price HJ. (pers. comm. 1999).
349. Wendel JF, Johnston S, Price HJ. (pers. comm. 1999).
350. Krisai R, Greilhuber J. 1997. *Cochlearia pyrenaica* DC., das Löffelkraut, in Oberösterreich (mit Anmerkungen zur Karyologie und zur Genomgröße). *Beiträge zur Naturkunde Oberösterreichs* **5**: 151–160.
351. Uozu S, Ikehashi H, Ohmido N, Ohtsubo H, Ohtsubo E, Fukui K. 1997. Repetitive sequences: cause for variation in genome size and chromosome morphology in the genus *Oryza*. *Plant Molecular Biology* **35**: 791–799.
352. Bräutigam S, Bräutigam E. 1996. Determination of the ploidy level in the genus *Hieracium* subgenus *Pilosella* (Hill) S.F. Gray by flow cytometric DNA analysis. *Folia Geobotanica and Phytotaxonomica* **31**: 315–321.
353. Bottini MCJ, Greizerstein EJ, Premoli AC, Poggio L. 1998. Genome size and meiotic behavior of *Berberis* L. species from Patagonia, Argentina. *Cytogenetics and Cell Genetics* **81**: 125 and pers. comm.
354. Poggio L, Greizerstein EJ, Bottini MCJ, Guaglianone R. (pers. comm. 1999).
355. Sharma AK, Mukhopadhyay S. 1984. Feulgen microspectrophotometric estimation of nuclear DNA of species and varieties of three different genera of Marantaceae. *Proceedings of the Indian Academy of Science (Plant Science)* **93**: 337–347.
356. Šiljak-Yakovlev S, Cerbah M, Zoldos V, Godelle B. (pers. comm. 1998).
357. Nishikawa K, Furuta Y, Ishitoba K. 1984. Chromosomal evolution in genus *Carex* as viewed from nuclear DNA content, with special reference to its aneuploidy. *Japanese Journal of Genetics* **59**: 465–472.
358. Ollitrault P, Dambier D, Luro F, Duperray C. 1994. Nuclear genome size variation in *Citrus*. *Fruits* **49**: 390–393.
359. Sun M, Hu YZ, Chen H. (pers. comm. 1999).
360. Greilhuber J, Obermayer R. 1998. Genome size variation in *Cajanus cajan* (Fabaceae): a reconsideration. *Plant Systematics and Evolution* **212**: 135–141.
361. Dimitrova D, Ebert I, Greilhuber J, Kozuharov S. 1999. Karyotype constancy and genome size variation in Bulgarian *Crepis foetida* s.l. (Asteraceae). *Plant Systematics and Evolution* **217**: 245–257.
362. Jones WE, Kuehnle AR. 1998. Ploidy identification using flow cytometry in tissues of *Dendrobium* species and cultivars. *Lindleyana* **13**: 11–18.

363. Akpınar N, Yildiz B. 1999. Nuclear DNA contents of some endemic *Hedysarum* L. species. *Turkish Journal of Botany* 23: 229–232.
364. Mukherjee S, Sharma AK. 1995. *In situ* nuclear DNA variation in Australian species of *Acacia*. *Cytobios* 83: 59–64.
365. Martínez CP, Arumuganathan K, Kikuchi H, Earle ED. 1994. Nuclear DNA content of ten rice species as determined by flow cytometry. *Japanese Journal of Genetics* 69: 513–523.
366. Favre JM, Brown S. 1996. A flow cytometric evaluation of the nuclear DNA content and GC percent in genomes of European oak species. *Annales des Sciences Forestières* 53: 915–917.
367. Keeler KH. 1992. Local polyploid variation in the native prairie grass *Andropogon gerardii*. *American Journal of Botany* 79: 1229–1232.
368. Hultquist SJ, Vogel KP, Lee DJ, Arumuganathan K, Kaepler S. 1997. DNA content and chloroplast DNA polymorphisms among switchgrasses from remnant midwestern prairies. *Crop Science* 37: 595–598.
369. Obermayer R, Świącicki WK, Greilhuber J. 1999. Flow cytometric determination of genome size in some old world *Lupinus* species (Fabaceae). *Plant Biology* 1: 403–407.
370. Lysák MA, Doležel J. 1998. Estimation of nuclear DNA content in *Sesleria* (Poaceae). *Caryologia* 52: 123–132.
371. Greilhuber J, Baranyi M. 1999. Feulgen densitometry: importance of a stringent hydrolysis regime. *Plant Biology* 1: 538–540.
372. Bennett MD, Hanson L. (pers. comm. 1997).
373. Bennett MD, Price HJ, Johnston S. (pers. comm. 1999).
374. Mulry M, Hanson L. (pers. comm. 1999).
375. Bennett MD, Leitch IJ, Hanson L. 1998. DNA amounts in two samples of angiosperm weeds. *Annals of Botany* 82 (Supplement A): 121–134.
376. Houben A, Wanner G, Hanson L, Verlin D, Leach CR, Timmis JN. Cloning and characterisation of polymorphic heterochromatic segments of *Brachycome dichromosomatica*. *Chromosoma* 109: 206–213.
377. Hanson L, Leitch IJ, Bennett MD. 1999. Unpublished values from the Jodrell Laboratory, Royal Botanic Gardens, Kew.
